# Supplementary material for: Nucleophile promoted gold redox catalysis with diazonium salts: C–Br, C–S and C–P bond formation through catalytic Sandmeyer coupling
Source: PubMed Central journal article supplement (PMC6024175; doi:10.1039/c6sc01742h), 2016-06-10

*Supporting Information*

**Aryldiazonium Promoted Gold-Redox Catalysis: C-Br, C-P and C-S  
Bond Formation through Catalytic Sandmeyer Coupling**

**Haihui Peng,<sup>a</sup> Rong Cai,<sup>b</sup> Chang Xu,<sup>c</sup> Hao Chen<sup>c</sup> and Xiaodong Shi<sup>\*a</sup>**

<sup>a</sup> *Department of Chemistry, University of South Florida, Tampa, FL 33620, USA*

<sup>b</sup> *C. Eugene Bennett Department of Chemistry, West Virginia University, Morgantown, WV 26506, USA*

<sup>c</sup> *Center for Intelligent Chemical Instrumentation, Department of Chemistry and Biochemistry, Edison Biotechnology Institute., Ohio University, Athens, OH 45701, USA*

|                                                                    |                 |
|--------------------------------------------------------------------|-----------------|
| I. General Methods and Materials                                   | <b>S2</b>       |
| II. General Procedures                                             | <b>S2-S4</b>    |
| III. Stoichiometric experiment with Au complex                     | <b>S5-S7</b>    |
| IV. Kinetics Experiments with Au/non-metal C-S bond formation      | <b>S8-S10</b>   |
| V. Exploring the Au(III) intermediate in Au(I) oxidation by ESI-MS | <b>S11-S15</b>  |
| VI. Compounds Characterization                                     | <b>S16-S28</b>  |
| VII. NMR Spectra of New Compounds                                  | <b>S29-S105</b> |

## I. General Methods and Materials

All of the reactions dealing with air and/or moisture-sensitive reactions were carried out under an atmosphere of nitrogen using oven/flame-dried glassware. Unless otherwise noted, all commercial reagents and solvents were obtained from the commercial provider and used without further purification.  $\text{PPh}_3\text{AuCl}$ ,  $\text{PPh}_3\text{AuNTf}_2$  were synthesized according to literature report.  $^1\text{H}$  NMR,  $^{13}\text{C}$  NMR,  $^{31}\text{P}$  NMR, and  $^{19}\text{F}$  NMR spectra were recorded on Agilent 400 MHz or Varian 600 MHz spectrometers. Chemical shifts were reported relative to internal tetramethylsilane ( $\delta$  0.00 ppm) or  $\text{CDCl}_3$  ( $\delta$  7.26 ppm) for  $^1\text{H}$  and  $\text{CDCl}_3$  ( $\delta$  77.0 ppm) for  $^{13}\text{C}$ . Flash column chromatography was performed on 230-430 mesh silica gel.

## II. General Procedures

### A. General procedure of conditions for Au(I) catalyzed C-X bond formation

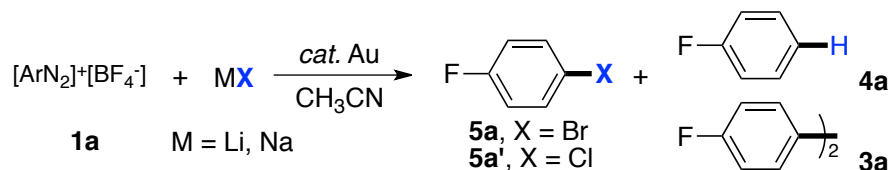

In a dried glass tube, **1a** (0.1 mmol), [Au] (0.005 mmol, 5 mol %) and MX (0.3 mmol, 3 equiv) were dissolved in  $\text{CH}_3\text{CN}$  (0.3 mL). The reaction mixture was stirred at 50 °C for 5-12 h. After the reaction completed, the reaction was filtrate through a pad of silica gel. After evacuation of the solvents, the NMR yields were obtained by  $^{19}\text{F}$  NMR analysis of the crude mixture with the internal standard of benzotrifluoride. The results were summarized in Table S1.

**Table S1.** Screening of conditions

| entry | cat.Au(%)                       | MX   | Solvent                | Time/h              | convn (%) <sup>a</sup> | yield (%) <sup>a,b</sup> |       |       |
|-------|---------------------------------|------|------------------------|---------------------|------------------------|--------------------------|-------|-------|
|       |                                 |      |                        |                     |                        | 5a                       | 3a    | 4a    |
| 1     | None                            | LiCl | $\text{CH}_3\text{CN}$ | 50 °C, 12 h         | 50                     | <10                      | Trace | 33    |
| 2     | 5% $\text{Ph}_3\text{PAuCl}$    | LiCl | $\text{CH}_3\text{CN}$ | 50 °C, 12 h         | 70                     | 5a', <5                  | Trace | 38    |
| 3     | 5% $\text{Ph}_3\text{PAuNTf}_2$ | LiCl | $\text{CH}_3\text{CN}$ | 50 °C, 12 h         | 77                     | 5a', <5                  | Trace | 43    |
| 4     | 5% $\text{Ph}_3\text{PAuNCl}$   | NaBr | $\text{CH}_3\text{CN}$ | 50 °C, 12 h         | 100                    | 5a, 51                   | 11    | 23    |
| 5     | 5% $\text{Ph}_3\text{PAuNTf}_2$ | NaBr | $\text{CH}_3\text{CN}$ | 50 °C, 12 h         | 100                    | 5a, 58                   | 9     | 18    |
| 6     | 5% $\text{Ph}_3\text{PAuNTf}_2$ | LiBr | $\text{CH}_3\text{CN}$ | 50 °C, 12 h         | 100                    | 5a, 68                   | 6     | 15    |
| 7     | 5% $\text{Ph}_3\text{PAuNTf}_2$ | LiBr | $\text{CH}_3\text{CN}$ | 20% bpy, 50 °C, 5 h | 100                    | 5a, 63                   | 8     | 15    |
| 8     | 5% $\text{Ph}_3\text{PAuCl}$    | LiBr | $\text{CH}_3\text{CN}$ | 50 °C, 5 h          | 100                    | 5a, 83                   | 7     | Trace |
| 9     | 3% $\text{Ph}_3\text{PAuCl}$    | LiBr | $\text{CH}_3\text{CN}$ | 50 °C, 5 h          | 100                    | 5a, 81                   | 7     | <5    |
| 10    | 1% $\text{Ph}_3\text{PAuCl}$    | LiBr | $\text{CH}_3\text{CN}$ | 50 °C, 5 h          | 100                    | 5a, 63                   | 13    | 9     |
| 11    | 5% $\text{Ph}_3\text{PAuCl}$    | LiBr | Acetone                | 50 °C, 5 h          | 100                    | 5a, 11                   | 37    | Trace |

<sup>a</sup> Reaction conditions: **1a** (0.1 mmol), Au (5 mol%), MX (0.3 mmol), additives and solvent (0.33M); <sup>b</sup> Determined by  $^{19}\text{F}$  NMR using benzotrifluoride as internal standard; <sup>c</sup> The major byproduct is biaryl; <sup>d</sup> Yield of biaryl:37%.

## B. General procedure of conditions for Au(I) catalyzed C-P bond formation

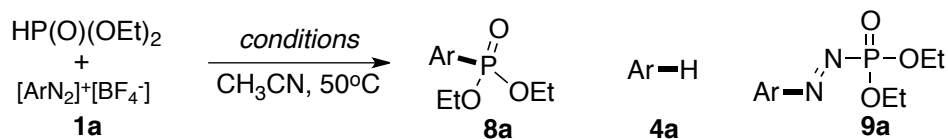

In a dried glass tube, **1a** (0.2 mmol, 2 equiv), [Au] (0.005 mmol, 5 mol %), HP(O)(OEt)<sub>2</sub> (0.1 mmol, 1 equiv) and additives (2 equiv) were dissolved in CH<sub>3</sub>CN (0.3 mL). The reaction mixture was stirred at 50 °C for 5-12 h. After the reaction completed, the reaction was filtrate through a pad of silica gel. After evacuation of the solvents, the NMR yields were obtained by <sup>19</sup>F NMR analysis of the crude mixture with the internal standard of benzotrifluoride. The results were summarized in Table S2.

**Table S2.** Screening of conditions

| entry | cat.Au(%)                              | Additive(2 equiv)                        | Solvent                       | Time/h | convn (%) <sup>a</sup> | yield (%) <sup>a,b</sup> |           |           |
|-------|----------------------------------------|------------------------------------------|-------------------------------|--------|------------------------|--------------------------|-----------|-----------|
|       |                                        |                                          |                               |        |                        | <b>8a</b>                | <b>4a</b> | <b>9a</b> |
| 1     | None                                   | None                                     | CH <sub>3</sub> CN            | 10 h   | 50                     | 0                        | 31        | 0         |
| 2     | None                                   | Na <sub>2</sub> CO <sub>3</sub>          | CH <sub>3</sub> CN            | 10 h   | 100                    | 0                        | 70        | 0         |
| 3     | 1 eq Cu(OAc) <sub>2</sub>              | Na <sub>2</sub> CO <sub>3</sub>          | CH <sub>3</sub> CN            | 10 h   | 100                    | 0                        | 75        | 0         |
| 4     | 5% PPh <sub>3</sub> AuCl               | None                                     | CH <sub>3</sub> CN            | 10 h   | 50                     | 25                       | 13        | 0         |
| 5     | 5% PPh <sub>3</sub> AuCl               | Na <sub>2</sub> CO <sub>3</sub>          | CH <sub>3</sub> CN            | 10 h   | 100                    | 11                       | 38        | 0         |
| 6     | 5% PPh <sub>3</sub> AuNTf <sub>2</sub> | 20% bpy, Na <sub>2</sub> CO <sub>3</sub> | CH <sub>3</sub> CN            | 10 h   | 100                    | <5                       | 53        | 11        |
| 7     | 5% PPh <sub>3</sub> AuNTf <sub>2</sub> | 3-Cl-py                                  | CH <sub>3</sub> CN            | 5h     | 100                    | 67                       | 16        | 0         |
| 8     | 5% PPh <sub>3</sub> AuCl <sup>c</sup>  | 3-Cl-py                                  | CH <sub>3</sub> CN            | 5 h    | 100                    | 73                       | 15        | 0         |
| 9     | None <sup>d</sup>                      | 3-Cl-py                                  | CH <sub>3</sub> CN            | 10 h   | 69                     | 0                        | 5         | 44        |
| 10    | None                                   | 3-Cl-py                                  | CH <sub>3</sub> CN            | 10h    | >90                    | 0                        | 25        | 4         |
| 11    | 5% PPh <sub>3</sub> AuCl               | Py                                       | CH <sub>3</sub> CN            | 2 h    | 100                    | 9                        | 36        | 0         |
| 12    | 5% PPh <sub>3</sub> AuCl               | 2,6-Lutidine                             | CH <sub>3</sub> CN            | 3 h    | 100                    | 26                       | 26        | 0         |
| 13    | 5% PPh <sub>3</sub> AuCl               | DMAP                                     | CH <sub>3</sub> CN            | 0.5 h  | 100                    | 0                        | 71        | 0         |
| 14    | 5% Ph <sub>3</sub> PAuCl               | 3-Cl-Py                                  | CH <sub>3</sub> CN/EtOH = 6:1 | 3 h    | 100                    | 83                       | 7         | 0         |
| 15    | 3% PPh <sub>3</sub> AuCl               | 3-Cl-py                                  | CH <sub>3</sub> CN/EtOH = 6:1 | 5 h    | 100                    | 70                       | 13        | 0         |
| 16    | 1% PPh <sub>3</sub> AuCl               | 3-Cl-py                                  | CH <sub>3</sub> CN/EtOH = 6:1 | 7 h    | 100                    | 51                       | 18        | 0         |

<sup>a</sup> Reaction conditions: **1a** (0.2 mmol), Au (5 mol%), HP(O)(OEt)<sub>2</sub> (0.1 mmol), additives and solvent (0.33M); <sup>b</sup> Determined by <sup>19</sup>F NMR using benzotrifluoride as internal standard; <sup>c</sup> The major byproduct is biaryl, yield of biaryl:37%; <sup>d</sup> room temperature.

### C. General procedure for Au(I) catalyzed C-Br bond formation

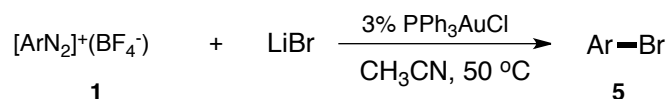

In a dried glass tube, **1** (0.2 mmol), PPh<sub>3</sub>AuCl (0.010 mmol, 5 mol %) and LiBr (0.6 mmol, 3 equiv) were dissolved in CH<sub>3</sub>CN (0.5 mL). The reaction mixture was stirred at 50 °C for 5 h. After the reaction completed, the reaction mixture was directly put on the column to obtain the product.

### D. General procedure for Au(I) catalyzed C-S bond formation

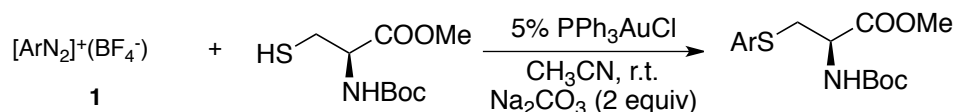

In a dried glass tube, **1** (0.4 mmol, 2 equiv), PPh<sub>3</sub>AuCl (0.010 mmol, 5 mol %), Na<sub>2</sub>CO<sub>3</sub> (2 equiv) and **4** (0.2 mmol, 1 equiv) were dissolved in CH<sub>3</sub>CN (0.5 mL). The reaction mixture was stirred at room temperature for 3 h. After the reaction completed, the reaction mixture was directly put on the column to obtain the product.

### E. General procedure for Au(I) catalyzed C-P bond formation

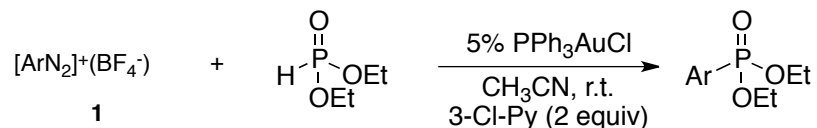

In a dried glass tube, **1** (0.4 mmol, 2 equiv), PPh<sub>3</sub>AuCl (0.010 mmol, 5 mol %), diethyl phosphite (0.2 mmol, 1 equiv) and 3-Cl-Py (0.4 mmol, 1 equiv) were dissolved in CH<sub>3</sub>CN (0.5 mL). The reaction mixture was stirred at 50 °C for 8 h. After the reaction completed, the reaction mixture was directly put on the column to obtain the product.

### III. Stoichiometric experiment with PPh<sub>3</sub>Au complex

#### A. Stoichiometric experiments of diazonium with PPh<sub>3</sub>AuCl

In a dried glass tube, **1a** (0.036 mmol, 1.1 equiv), Nu<sup>-</sup> (1 equiv) and PPh<sub>3</sub>AuCl (0.033 mmol, 1 equiv) were dissolved in CD<sub>3</sub>CN (0.3 mL). The reaction mixture was stirred at 50 °C for 10h. The results were summarized in **Figure S1**. By using bpy as nucleophile, the reaction kinetics was also monitored with <sup>31</sup>P NMR, the results were summarized in Figure S2.

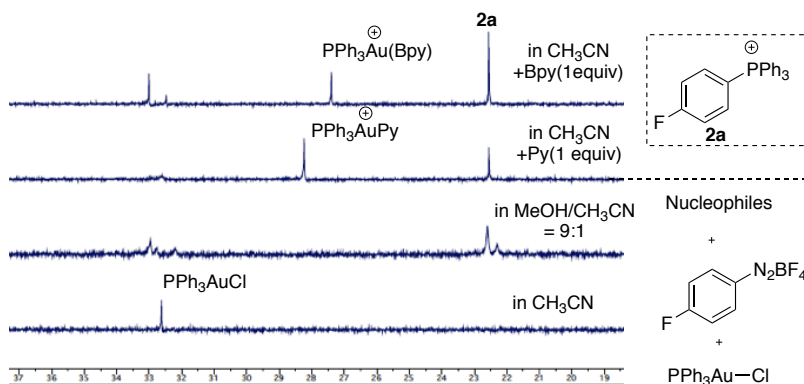

**Figure S1.** <sup>31</sup>P NMR of PPh<sub>3</sub>AuCl with diazonium **1a** in the presence of nucleophiles

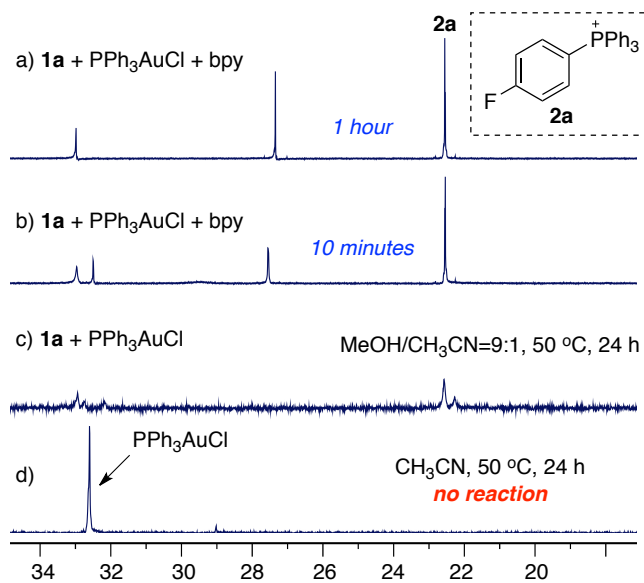

**Figure S2.** <sup>31</sup>P NMR of PPh<sub>3</sub>AuCl with diazonium **1a** in the presence of bpy

### **B. Stoichiometric experiments of diazonium with PPh<sub>3</sub>AuNTf<sub>2</sub>**

In a dried glass tube, **1a** (0.05 mmol, 1.5 equiv) and PPh<sub>3</sub>AuNTf<sub>2</sub> (0.033 mmol, 1 equiv) were dissolved in CD<sub>3</sub>CN (0.3 mL). The reaction mixture was stirred at 50 °C for 10 h. The reaction was monitored by <sup>31</sup>P NMR and <sup>19</sup>F NMR. The results were summarized in **Figure S3** and **Figure S4**.

### **C. Stoichiometric experiments of diazonium with PPh<sub>3</sub>AuCl**

In a dried glass tube, **1a** (0.05 mmol, 1.5 equiv) and PPh<sub>3</sub>AuCl (0.033 mmol, 1 equiv) were dissolved in CD<sub>3</sub>CN (0.3 mL). The reaction mixture was stirred at 50 °C for 10 h. The reaction was monitored by <sup>31</sup>P NMR and <sup>19</sup>F NMR. The results were summarized in **Figure S3** and **Figure S4**.

### **D. Stoichiometric experiments of diazonium with PPh<sub>3</sub>AuNTf<sub>2</sub> and 1 equiv LiCl**

In a dried glass tube, **1a** (0.05 mmol, 1.5 equiv), PPh<sub>3</sub>AuNTf<sub>2</sub> (0.033 mmol, 1 equiv) and LiCl (0.033 mmol, 1 equiv) were dissolved in CD<sub>3</sub>CN (0.3 mL). The reaction mixture was stirred at 50 °C for 10 h. The reaction was monitored by <sup>31</sup>P NMR and <sup>19</sup>F NMR. The results were summarized in **Figure S3** and **Figure S4**.

### **E. Stoichiometric experiments of diazonium with PPh<sub>3</sub>AuNTf<sub>2</sub> and 10 equiv LiCl**

In a dried glass tube, **1a** (0.05 mmol, 1.5 equiv), PPh<sub>3</sub>AuNTf<sub>2</sub> (0.033 mmol, 1 equiv) and LiCl (0.33 mmol, 10 equiv) were dissolved in CD<sub>3</sub>CN (0.3 mL). The reaction mixture was stirred at 50 °C for 10 h. The reaction was monitored by <sup>31</sup>P NMR and <sup>19</sup>F NMR. The results were summarized in **Figure S3** and **Figure S4**.

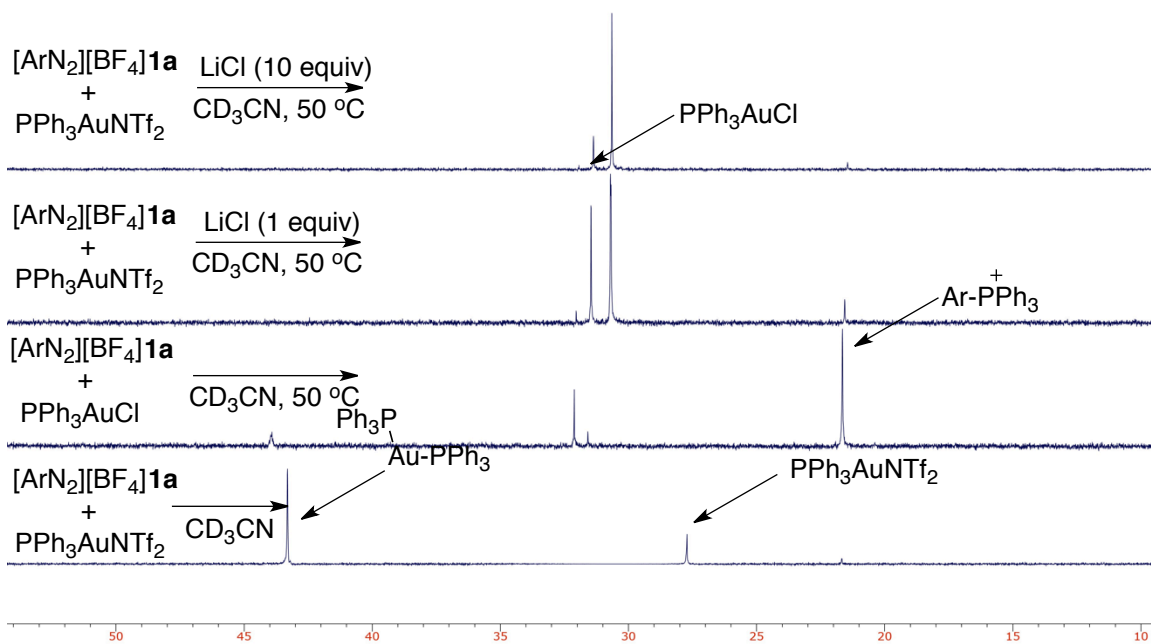

Figure S3.  $^{31}P$  NMR analysis of stoichiometric experiments

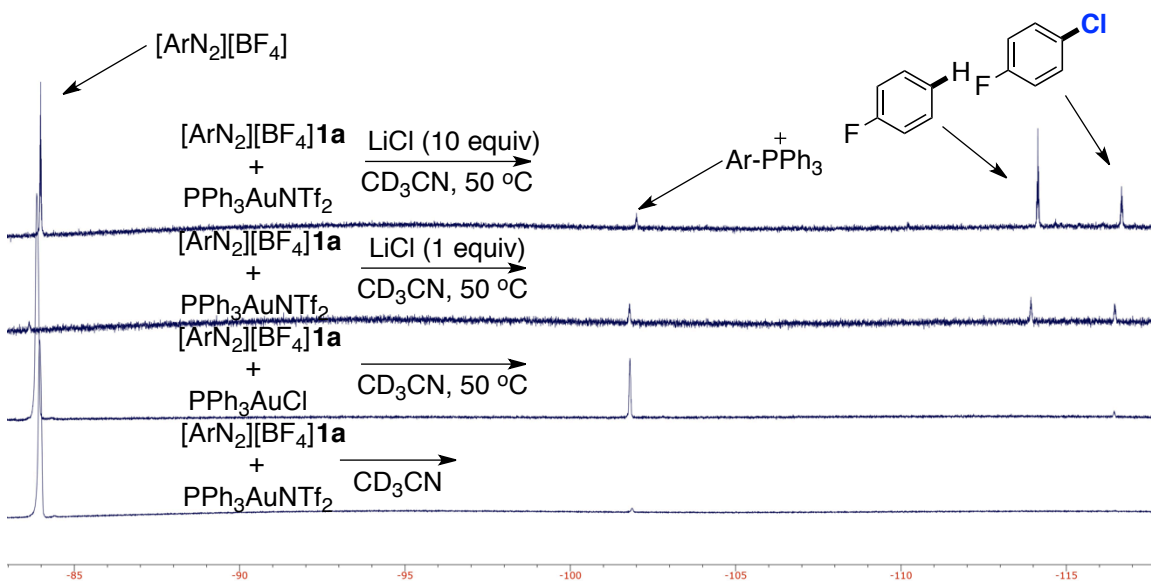

Figure S4.  $^{19}F$  NMR analysis of stoichiometric experiments

## IV. Kinetics Experiments for C-S bond formation

### A. Kinetics Experiments for Au-catalyzed C-S bond formation

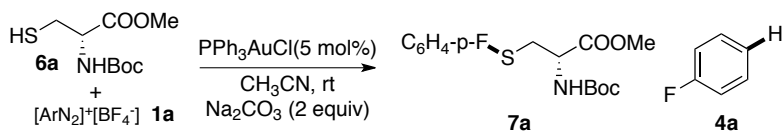

In a dried glass tube, **1a** (0.4 mmol, 2 equiv),  $\text{PPh}_3\text{AuCl}$  (0.010 mmol, 5 mol %),  $\text{Na}_2\text{CO}_3$  (0.4 mmol, 2 equiv) and **4** (0.2 mmol, 1 equiv) were dissolved in  $\text{CD}_3\text{CN}$  (0.5 mL). The reaction mixture was stirred at room temperature for 3 h. The reaction was monitored by  $^{19}\text{F}$  NMR analysis with the internal standard of benzotrifluoride with different reaction time. The results were summarized in **Figure S5**.

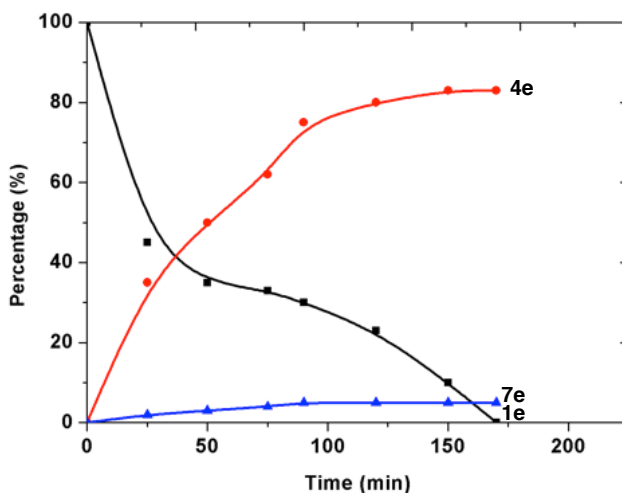

**Figure S5.**  $\text{PPh}_3\text{AuCl}$  catalyzed C-S bond formation



## B. Kinetics Experiments for C-S bond formation without gold catalyst

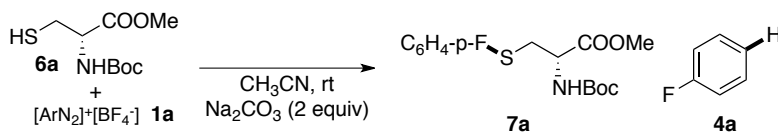

In a dried glass tube, **1a** (0.4 mmol, 2 equiv), Na<sub>2</sub>CO<sub>3</sub> (0.4 mmol, 2 equiv) and **4** (0.2 mmol, 1 equiv) were dissolved in CD<sub>3</sub>CN (0.5 mL). The reaction mixture was stirred at room temperature for 3 h. The reaction was monitored by <sup>19</sup>F NMR analysis with the internal standard of benzotrifluoride with different reaction time. The results were summarized in **Figure S6**.

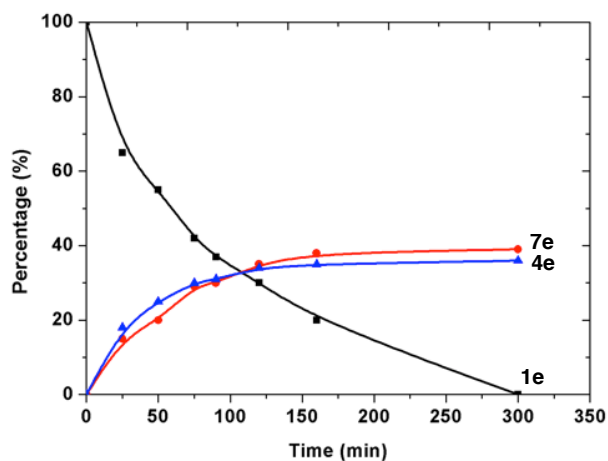

**Figure S6.** Na<sub>2</sub>CO<sub>3</sub> promoted C-S bond formation

### C. Kinetics Experiments for C-S bond formation without base and catalyst

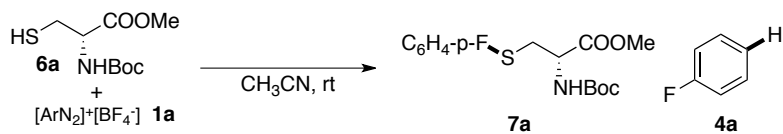

In a dried glass tube, **1a** (0.4 mmol, 2 equiv) and **4** (0.2 mmol, 1 equiv) were dissolved in  $\text{CD}_3\text{CN}$  (0.5 mL). The reaction mixture was stirred at room temperature for 3 h. The reaction was monitored by  $^{19}\text{F}$  NMR analysis with the internal standard of benzotrifluoride with different reaction time. The results were summarized in **Figure S7**.

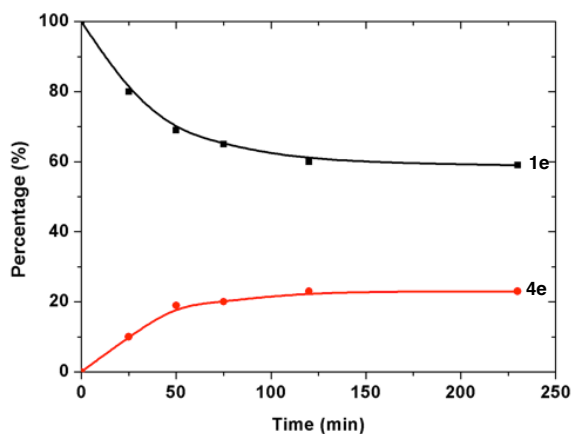

**Figure S7.** No metal or base promoted reaction

## V. Exploring the Au(III) intermediate in Au(I) oxidation by electrospray ionization mass spectrometry (ESI-MS).

ESI-MS spectra were collected using a Waters Xevo QToF mass spectrometer (Milford, MA, USA) in the positive ion mode. The samples were infused and sprayed at a flow rate of 10  $\mu\text{L}/\text{min}$  with an applied high voltage of 5 kV.

20 mM  $\text{PPh}_3\text{AuCl}$  was reacted with NaBr at a 1:3 ratio in  $\text{CH}_3\text{CN}$  and was stirred at room temperature for 12 h. The solution was further stirred at 50  $^\circ\text{C}$  for 1 h on the next day. Then 20 mM of aryldiazonium **2a** was added to the reaction mixture and stirred for 1 h. The reaction solution was diluted to 500  $\mu\text{M}$  using  $\text{CH}_3\text{CN}$  and subsequently analyzed using ESI-MS. The acquired MS data is shown in Figure S8. Besides the aryldiazonium ion  $[\text{Ar}-\text{N}_2^+]$  ( $m/z$  123) seen in the spectrum, a Au(III) complex ion  $[\text{Ph}_3\text{PAuAr}(\text{Br})_2 + \text{Ar}-\text{N}_2^+]$  is also detected at  $m/z$  835 (Figure S8).

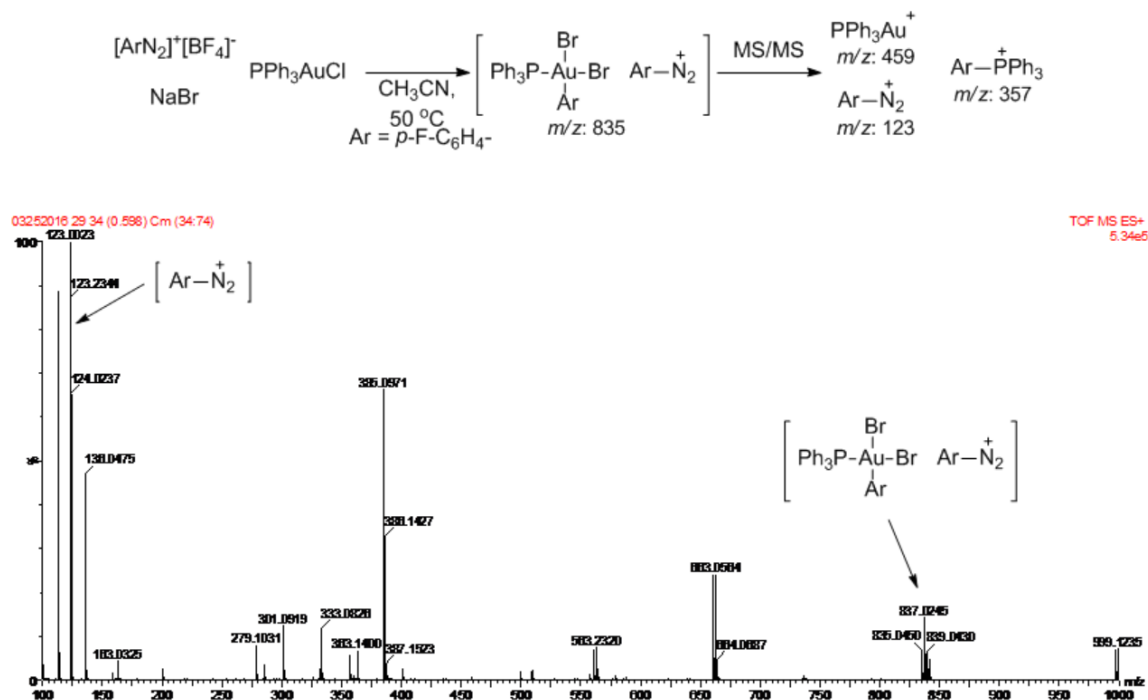

**Figure S8.** ESI-MS spectrum of the reaction mixture with NaBr.

Tandem MS analysis (MS/MS) was used to characterize the structures of assigned ions. Upon collision induced dissociation (CID),  $m/z$  835 gave rise to fragment ions  $[\text{Ph}_3\text{PAu}^+]$  ( $m/z$  459),  $[\text{Ar}-\text{PPh}_3]$  ( $m/z$  357),  $[\text{Ar}-\text{N}_2^+]$  ( $m/z$  123), consistent with the assigned Au(III) ion structure for  $m/z$  835. (Figure S9).

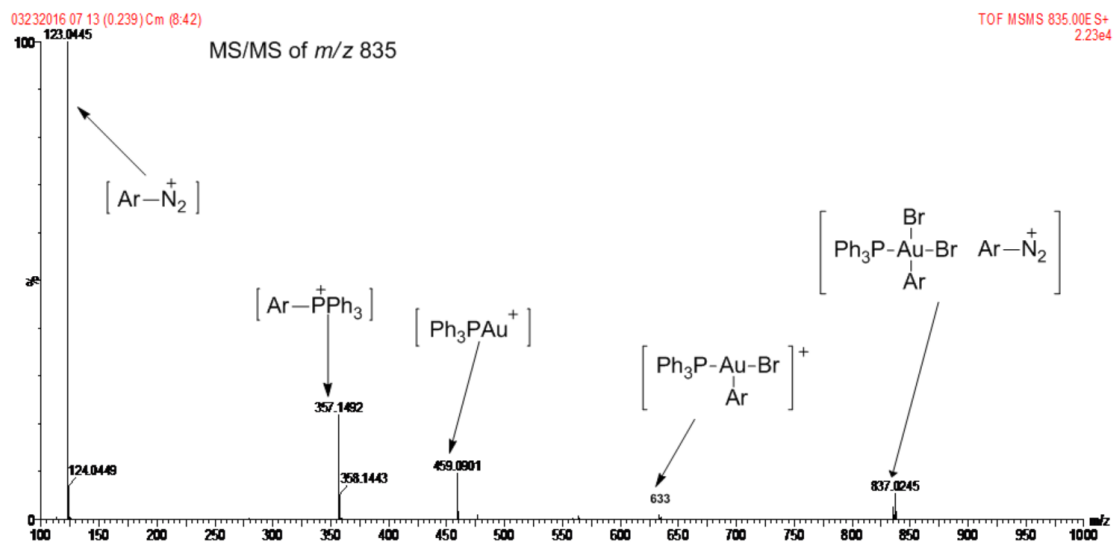

**Figure S9.** CID MS-MS spectrum of  $m/z$  835

The reaction was also examined using LiBr to replace NaBr. In the experiment, 20 mM  $PPh_3AuCl$  was reacted with LiBr in ACN at a 1:3 ratio and was stirred at room temperature for 12 h. The solution was stirred at 50 °C for 1 h on the next day. Then 20 mM of aryldiazonium **2a** was added to the reaction mixture and stirred for 1 hr. The reaction solution was diluted to 500  $\mu$ M using  $CH_3CN$  and subsequently analyzed using ESI-MS. The acquired MS data is shown in Figure S10. Beside  $[Ph_3PAuBr^+]$  ( $m/z$  545),  $[Ar-PPh_3^+]$  ( $m/z$  357),  $[Ar-N_2^+]$  ( $m/z$  123) seen in the spectrum, two solid (III) complex ions,  $[Ph_3PAuAr(Br)_2 + Li^+]$  ( $m/z$  719),  $[Ph_3PAuAr(Br)_2 + ArN_2^+]$  ( $m/z$  835) are also detected.

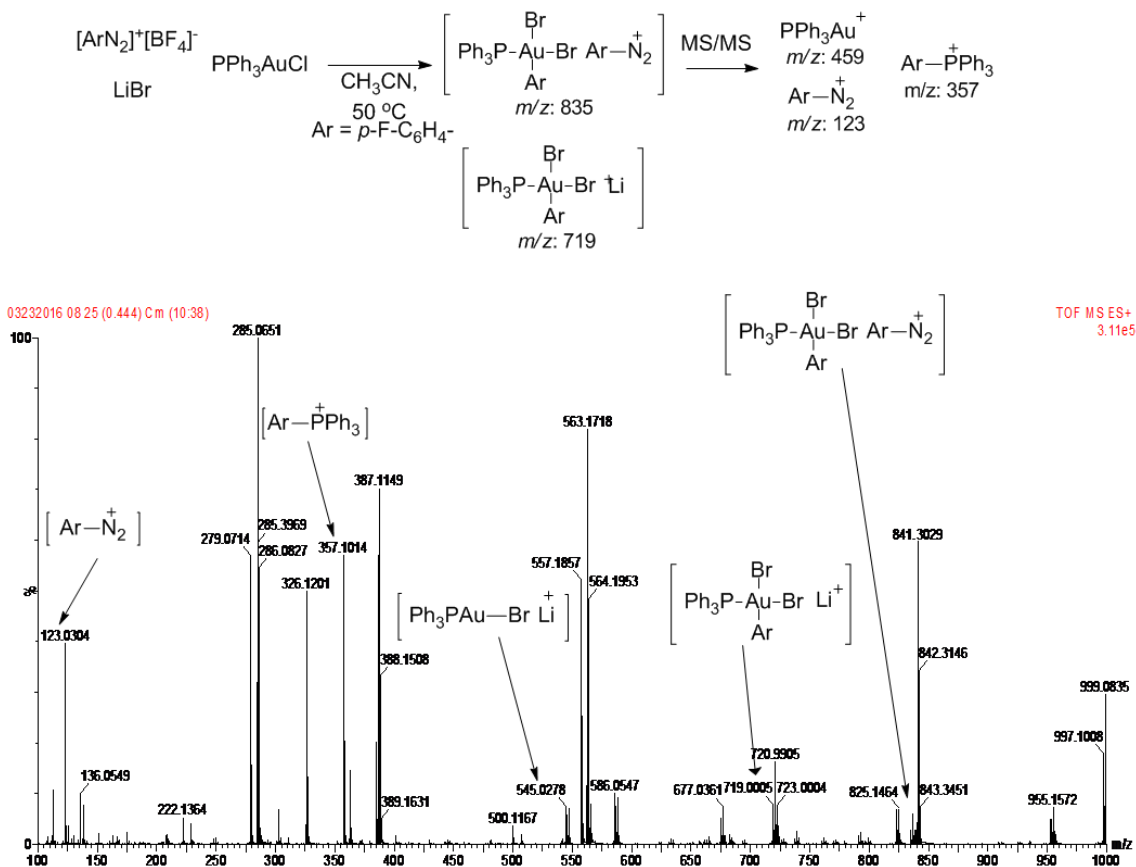

**Figure S10.** ESI-MS spectrum of the reaction mixture with LiBr

4 mM  $\text{PPh}_3\text{AuCl}$  was reacted with equal concentration of aryldiazonium and 2,2'-bipyridyl (bpy) at a 1:1:1 ratio in  $\text{CH}_3\text{CN}$  and was stirred at room temperature for 30 min. The reaction solution was diluted to 50  $\mu\text{M}$  using  $\text{CH}_3\text{CN}$  and subsequently analyzed using ESI-MS and the sample injected flow rate was 5  $\mu\text{L}/\text{min}$ . In addition to  $[\text{Ar-N}_2]^+$  ( $m/z$  123),  $[\text{bpy}+\text{H}]^+$  ( $m/z$  157),  $[\text{bpy}+\text{Ar-N}_2]^+$  ( $m/z$  279),  $[\text{bpy}+\text{Ph}_3\text{PAu}]^+$  ( $m/z$  615), and  $[\text{Cl}+2(\text{Ph}_3\text{PAu})]^+$  ( $m/z$  953) observed in the acquired MS spectrum (**Figure S-X**), an Au(III) complex ion  $[\text{Ph}_3\text{PAuAr}(\text{Cl})(\text{bpy})]^+$  was also detected at  $m/z$  745.

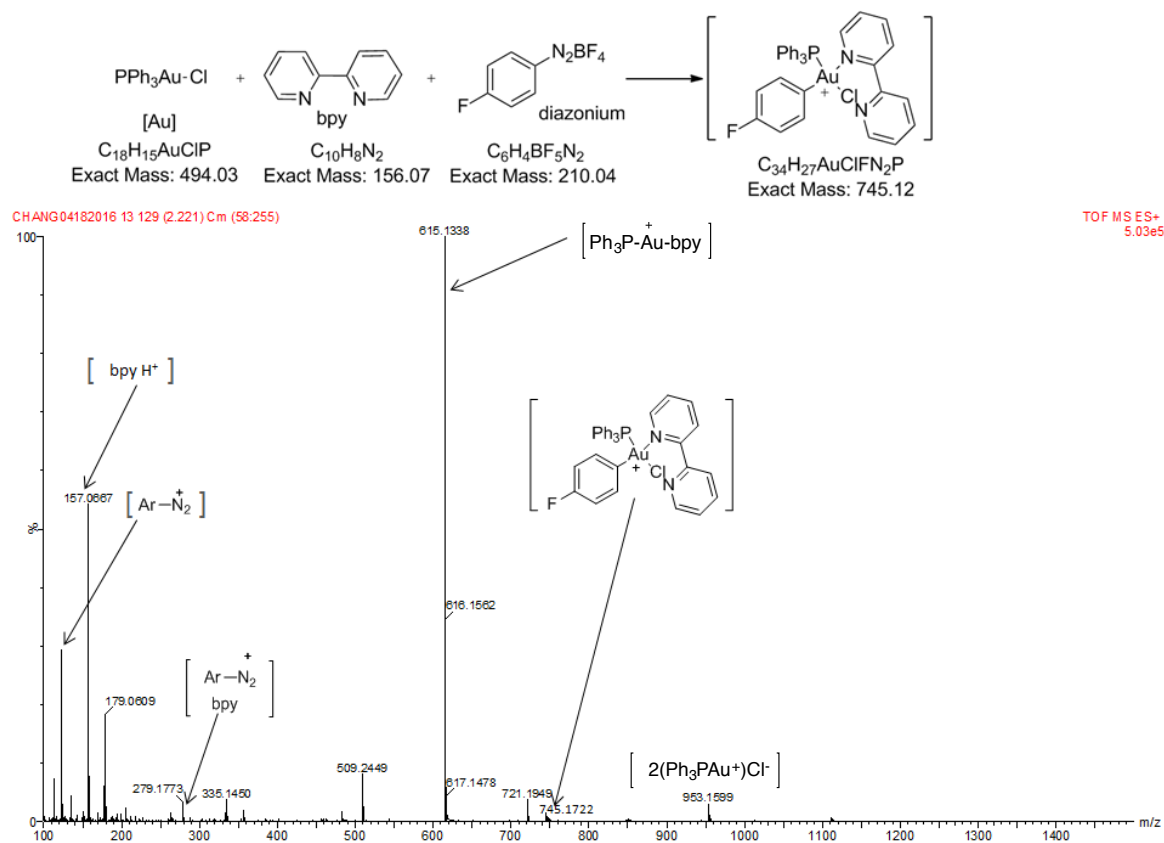

Tandem MS analysis (MS/MS) was used to characterize the structures of assigned ions. Upon collision induced dissociation (CID),  $m/z$  745 gave rise to fragment ions  $[\text{Ar-PPh}_3]^+$  ( $m/z$  357) and  $[\text{Ar-AuCl}(\text{bpy})]^+$  ( $m/z$  483), consistent with the assigned Au(III) ion structure for  $m/z$  745. (Figure S-Y).

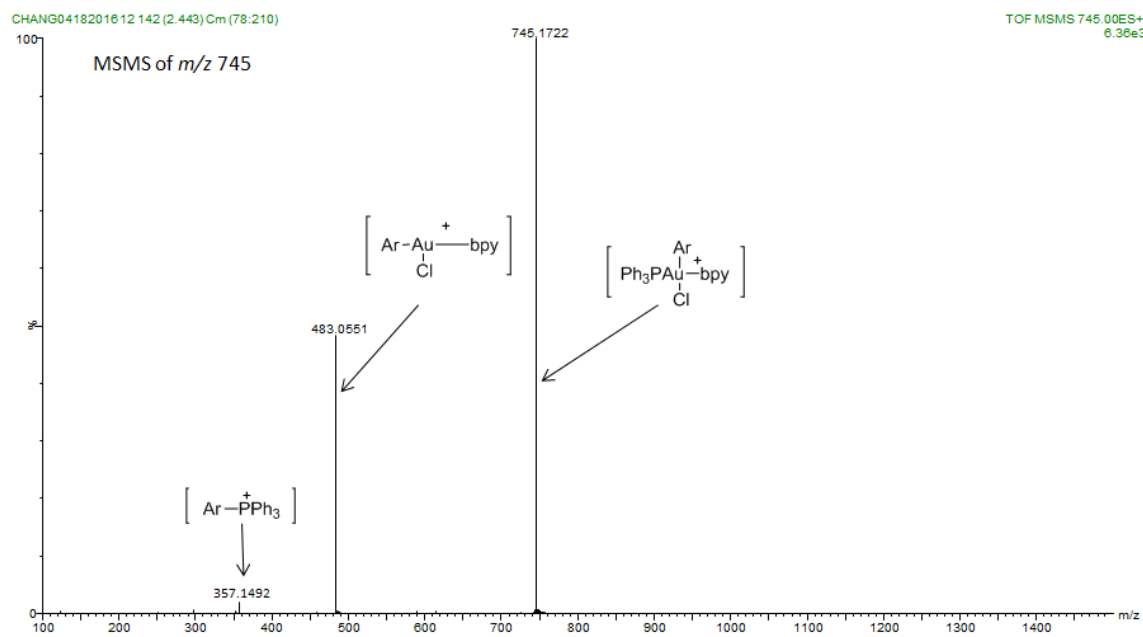

**Figure S12.** CID MS-MS spectrum of  $m/z$  745

## V. Compounds Characterization

Compounds **5a**, **5b**, **5c**, **5d**, **5e**, **5f**, and **5g** are commercially available and volatile compounds. **5h**,<sup>[1]</sup> **5i**,<sup>[2]</sup> **5j**,<sup>[3]</sup> **5k**,<sup>[4]</sup> **5m**,<sup>[5]</sup> **5n**,<sup>[6]</sup> **5o**,<sup>[7]</sup> **5p**,<sup>[8]</sup> **5r**,<sup>[9]</sup> **5s**,<sup>[10]</sup> **8a**, **8c**,<sup>[11]</sup> **8d**, **8e**,<sup>[12]</sup> **8g**,<sup>[13]</sup> and **8h**<sup>[14]</sup> were reported in literature.

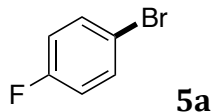

CAS: 460-00-4, GC-MS: 174.0, 95.1, 87.1, 75.1, 68.1, 50.1.

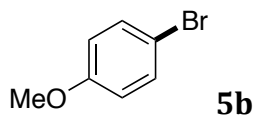

CAS: 104-92-7, GC-MS: 187.8, 170.8, 142.9, 118.9, 92.0, 77.0, 63.0.

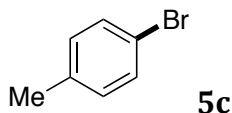

CAS: 106-38-7, GC-MS: 169.9, 91.0, 65.0.

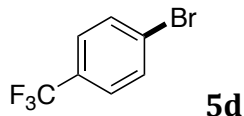

CAS: 402-43-7, GC-MS: 223.8, 204.8, 173.8, 144.9, 125.0, 95.0, 75.0.

---

[1] Rühling, A.; Galla, H.-J.; Glorius, F. *Chem. Eur. J.* **2015**, *21*, 12291.

[2] Gonzalez-de-Castro, A.; Xiao, J. *J. Am. Chem. Soc.*, **2015**, *137*, 8206.

[3] Skillinghaug, B.; Sköld, C.; Rydfjord, J.; Svensson, F.; Behrends, M.; Sävmarker, J.; Sjöberg, J. R.; Larhed, M. *J. Org. Chem.*, **2014**, *79*, 12018.

[4] Thomé, I.; Besson, C.; Kleine, T.; Bolm, C. *Angew. Chem. Int. Ed.* **2013**, *52*, 7509.

[5] Thompson, W. J.; Gaudino, J. *J. Org. Chem.*, **1984**, *49*, 5237.

[6] Hibi, S.; Ueno, K.; Nagato, S.; Kawano, K.; Ito, K.; Norimine, Y.; Takenaka, O.; Hanada, T.; Yonaga, M. *J. Med. Chem.*, **2012**, *55*, 10584.

[7] Arora, A.; Teegardin, K.; Weaver, J. D. *Org. Lett.*, **2015**, *17*, 3722.

[8] Uemura, Y.; Mori, S.; Hara, K.; Koumura, N. *Chem Lett.* **2011**, *40*, 872

[9] Uptmoor, A. C.; Freudenberg, J.; Schwäbel, S. T.; Paulus, F.; Rominger, F.; Hinkel, F.; Bunz, U. H. F. *Angew. Chem. Int. Ed.* **2015**, *54*, 14673.

[10] Tani, M.; Sakaguchi, S.; Ishii, Y. *J. Org. Chem.*, 2004, *69*, 1221.

[11] He, Y.; Wu, H.; Toste, F. D. *Chem. Sci.*, **2015**, *6*, 1194.

[12] Ballester, J.; Gatignol, J.; Schmidt, G.; Alayrac, C.; Gaumont, A.-C.; Taillefer, M. *ChemCatChem*, **2014**, *6*, 1549.

[13] Amatore, C.; Gareil, M.; Octuran, M. A.; Pinson, J.; Saveant, J. M.; Thiebault, A. *J. Org. Chem.*, **1986**, *51*, 3757.

[14] Zhuang, R.; Xu, J.; Cai, Z.; Tang, G.; Fang, M.; Zhao, Y. *Org. Lett.*, **2011**, *13*, 2110.



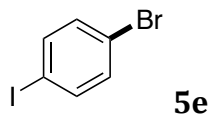

CAS: 589-87-7, GC-MS: 281.6, 154.8, 140.9, 126.8, 75.0.

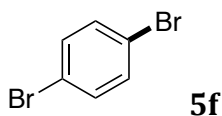

CAS: 106-37-6, GC-MS: 235.7, 154.8, 117.9, 75.0.

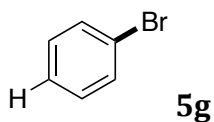

CAS: 108-86-1, GC-MS: 155.8, 77.0, 51.0.

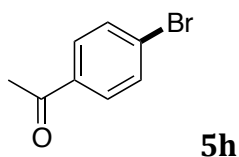

$^1\text{H NMR}$  (400 MHz,  $\text{CDCl}_3$ ):  $\delta$  7.82 (dt,  $J = 1.6, 8.4$  Hz, 2H), 7.61 (dt,  $J = 1.6, 8.8$  Hz, 2H), 2.61 (s, 3H).

$^{13}\text{C NMR}$  (100 MHz,  $\text{CDCl}_3$ ):  $\delta$  197.0, 135.8, 131.9, 129.8, 128.3, 26.5.

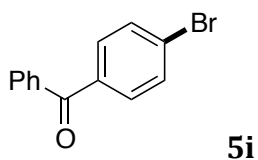

$^1\text{H NMR}$  (400 MHz,  $\text{CDCl}_3$ ):  $\delta$  7.77 (d,  $J = 7.2$  Hz, 2H), 7.67 (dt,  $J = 2.0, 8.8$  Hz, 2H), 7.61 (m, 3H), 7.49 (t,  $J = 7.6$  Hz, 2H).

$^{13}\text{C NMR}$  (100 MHz,  $\text{CDCl}_3$ ):  $\delta$  195.6, 137.1, 136.3, 132.6, 131.6, 131.5, 129.9, 128.4, 127.5.

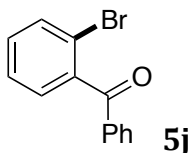

$^1\text{H NMR}$  (400 MHz,  $\text{CDCl}_3$ ):  $\delta$  7.81 (dd,  $J = 1.2, 8.4$  Hz, 2H), 7.63 (m, 2H), 7.45 (m, 3H), 7.35 (m, 2H).

$^{13}\text{C NMR}$  (100 MHz,  $\text{CDCl}_3$ ):  $\delta$  195.9, 140.7, 136.1, 133.8, 133.2, 131.2, 130.3, 129.0, 128.7, 127.2, 119.5.

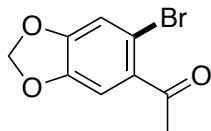

**5k**

$^1\text{H NMR}$  (400 MHz,  $\text{CDCl}_3$ ):  $\delta$  7.04 (s, 1H), 7.03 (s, 1H), 6.04 (s, 2H), 2.61 (s, 3H).

$^{13}\text{C NMR}$  (100 MHz,  $\text{CDCl}_3$ ):  $\delta$  199.4, 150.3, 147.3, 134.2, 113.8, 109.8, 102.4, 33.8, 30.2.

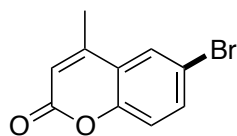

**5l**

$^1\text{H NMR}$  (400 MHz,  $\text{CDCl}_3$ ):  $\delta$  7.45 (m, 3H), 6.29 (q,  $J = 1.6$  Hz, 1H), 2.38 (q,  $J = 1.6$  Hz, 3H).

$^{13}\text{C NMR}$  (100 MHz,  $\text{CDCl}_3$ ):  $\delta$  159.9, 153.7, 151.8, 127.5, 125.6, 125.5, 120.1, 118.9, 115.2, 18.5.

HRMS:  $m/z$  (ESI) Calculated for  $[\text{M}+\text{H}]^+$  238.9708, Found 238.9688.

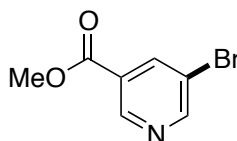

**5m**

$^1\text{H NMR}$  (400 MHz,  $\text{CDCl}_3$ ):  $\delta$  9.13 (d,  $J = 2.0$  Hz, 1H), 8.84 (d,  $J = 2.0$  Hz, 1H), 8.43 (d,  $J = 2.0$  Hz, 1H), 3.97 (s, 3H).

$^{13}\text{C NMR}$  (100 MHz,  $\text{CDCl}_3$ ):  $\delta$  164.5, 154.5, 148.8, 139.5, 127.3, 120.6, 52.7.

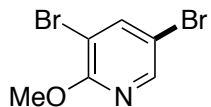

**5n**

$^1\text{H NMR}$  (400 MHz,  $\text{DMSO-d}_6$ ):  $\delta$  8.30 (d,  $J = 2.4$  Hz, 1H), 8.27 (d,  $J = 2.4$  Hz, 1H), 3.88 (s, 3H).

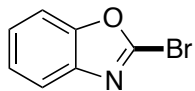

**5o**

$^1\text{H NMR}$  (500 MHz,  $\text{CDCl}_3$ ):  $\delta$  7.99 (d,  $J = 7.0$  Hz, 1H), 7.81 (dd,  $J = 1.5, 8.5$  Hz, 1H), 7.47 (dt,  $J = 1.0, 8.5$  Hz, 1H), 7.42 (dt,  $J = 1.5, 8.0$  Hz, 1H).

$^{13}\text{C NMR}$  (125 MHz,  $\text{CDCl}_3$ ):  $\delta$  152.3, 138.9, 137.3, 126.6, 125.7, 122.8, 120.9.

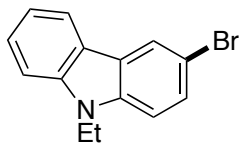

**5p**

$^1\text{H}$  NMR (500 MHz,  $\text{CDCl}_3$ ):  $\delta$  8.20 (d,  $J = 2.0$  Hz, 1H), 8.04 (d,  $J = 3.0$  Hz, 1H), 7.53 (dd,  $J = 2.0, 9.0$  Hz, 1H), 7.47 (ddd,  $J = 1.0, 7.0$  Hz, 1H), 7.40 (d,  $J = 8.0$  Hz, 1H), 7.26 (m, 2H), 4.34 (q,  $J = 7.5$  Hz, 2H), 1.4 (t,  $J = 7.5$  Hz, 3H).

$^{13}\text{C}$  NMR (125 MHz,  $\text{CDCl}_3$ ):  $\delta$  140.2, 138.5, 128.2, 126.3, 124.7, 123.1, 121.9, 120.6, 119.2, 111.5, 109.9, 108.7, 37.7, 13.7.

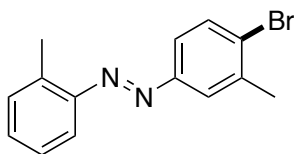

**5q**

$^1\text{H}$  NMR (400 MHz,  $\text{CDCl}_3$ ):  $\delta$  7.55 (s, 1H), 7.59 (m, 3H), 7.31 (m, 2H), 7.23 (m, 1H), 2.69 (s, 3H), 2.46 (s, 3H).

$^{13}\text{C}$  NMR (100 MHz,  $\text{CDCl}_3$ ):  $\delta$  152.0, 150.6, 138.8, 138.3, 133.0, 131.4, 131.2, 127.6, 126.5, 125.3, 121.4, 115.4, 23.1, 17.6.

HRMS:  $m/z$  (ESI) Calculated for  $[\text{M}+\text{NH}]^+$  289.0340, Found 289.0335.

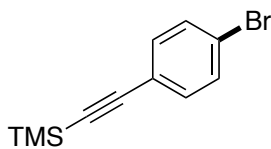

**5r**

$^1\text{H}$  NMR (500 MHz,  $\text{CDCl}_3$ ):  $\delta$  7.52 (d,  $J = 8.0$  Hz, 2H), 7.41 (d,  $J = 8.0$  Hz, 2H), 0.33 (s, 9H).

$^{13}\text{C}$  NMR (125 MHz,  $\text{CDCl}_3$ ):  $\delta$  133.4, 131.5, 122.7, 122.1, 103.8, 95.6, 29.7, -0.1.

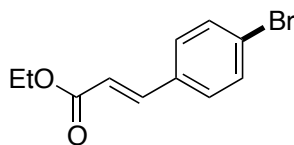

**5s**

$^1\text{H}$  NMR (500 MHz,  $\text{CDCl}_3$ ):  $\delta$  8.20 (d,  $J = 2.0$  Hz, 1H), 8.04 (d,  $J = 3.0$  Hz, 1H), 7.61 (d,  $J = 16.0$  Hz, 1H), 7.52 (d,  $J = 8.0$  Hz, 2H), 7.38 (d,  $J = 8.0$  Hz, 2H), 6.42 (d,  $J = 16.0$  Hz, 1H), 4.26 (q,  $J = 7.5$  Hz, 2H), 1.33 (t,  $J = 7.5$  Hz, 3H).

$^{13}\text{C}$  NMR (125 MHz,  $\text{CDCl}_3$ ):  $\delta$  166.7, 143.2, 133.4, 132.1, 129.4, 124.4, 119.0, 60.6, 14.3.

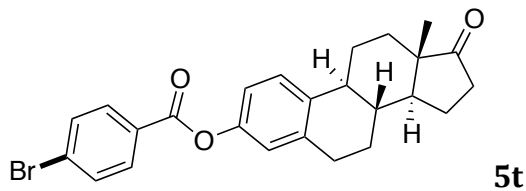

$^1\text{H}$  NMR (400 MHz,  $\text{CDCl}_3$ ):  $\delta$  7.94 (dd,  $J = 2.0, 6.4$  Hz, 2H), 7.53 (dd,  $J = 2.0, 6.4$  Hz, 2H), 7.23 (d,  $J = 8.4$  Hz, 1H), 6.88 (dd,  $J = 2.8, 8.4$  Hz, 1H), 6.84 (d,  $J = 2.8$  Hz, 1H), 2.83 (dd,  $J = 4.4$  Hz, 2H), 2.42 (d,  $J = 8.4$  Hz, 1H), 2.32 (m, 2H), 2.20 (m, 1H), 1.97 (m, 4H), 1.41 (m, 6H), 0.83 (s, 3H).

$^{13}\text{C}$  NMR (100 MHz,  $\text{CDCl}_3$ ):  $\delta$  220.5, 164.5, 148.5, 138.0, 137.5, 131.7, 131.5, 131.4, 128.5, 126.4, 121.4, 118.6, 50.4, 47.9, 44.2, 38.0, 35.9, 31.5, 29.4, 26.3, 25.7, 21.6, 13.8.

HRMS:  $m/z$  (ESI) Calculated for  $[\text{M}+\text{H}]^+$  453.1065, Found 453.1061.

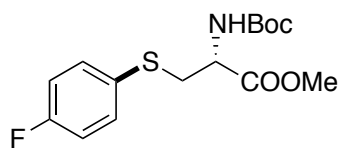

$^1\text{H}$  NMR (400 MHz,  $\text{CDCl}_3$ ):  $\delta$  7.39 (dd,  $J = 5.6, 9.2$  Hz, 2H), 6.96 (t,  $J = 8.8$  Hz, 2H), 5.35 (d,  $J = 7.6$  Hz, 1H), 4.50 (m, 1H), 3.53 (s, 3H), 3.27 (m, 2H), 1.38 (s, 9H).

$^{13}\text{C}$  NMR (100 MHz,  $\text{CDCl}_3$ ):  $\delta$  170.9, 162.1 (d,  $J = 246.0$  Hz), 154.8, 133.9 (dd,  $J = 8.0, 13.2$  Hz), 129.6, 116.0 (d,  $J = 21.7$  Hz), 80.0, 53.2, 52.2 (d,  $J = 12.2$  Hz), 38.1, 28.1 (d,  $J = 6.8$  Hz).

HRMS:  $m/z$  (ESI) Calculated for  $[\text{M}+\text{Na}]^+$  352.0995, Found 352.0983.

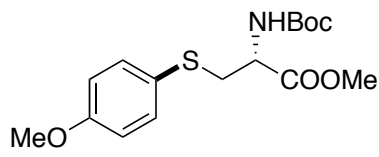

$^1\text{H}$  NMR (400 MHz,  $\text{CDCl}_3$ ):  $\delta$  7.39 (dt,  $J = 2.0, 7.2$  Hz, 2H), 6.83 (dt,  $J = 2.0, 7.2$  Hz, 2H), 5.35 (d,  $J = 6.0$  Hz, 1H), 4.50 (m, 1H), 3.78 (s, 3H), 3.54 (s, 3H), 3.25 (d,  $J = 4.0$  Hz, 2H), 1.42 (s, 9H).

$^{13}\text{C}$  NMR (125 MHz,  $\text{CDCl}_3$ ):  $\delta$  171.1, 159.4, 154.9, 134.4, 124.7, 114.6, 79.9, 55.2, 53.1, 52.2, 38.7, 28.2.

HRMS:  $m/z$  (ESI) Calculated for  $[\text{M}+\text{Na}]^+$  364.1195, Found 364.1185.

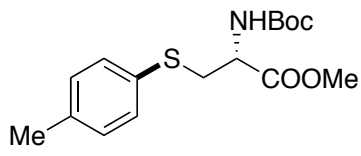

$^1\text{H}$  NMR (500 MHz,  $\text{CDCl}_3$ ):  $\delta$  7.31 (d,  $J = 8.0$  Hz, 2H), 7.09 (d,  $J = 8.0$  Hz, 2H), 5.37 (d,  $J = 7.0$  Hz, 1H), 4.53 (m, 1H), 3.54 (s, 3H), 3.31 (d,  $J = 5.0$  Hz, 2H), 2.31 (s, 3H), 1.41 (s, 9H).

$^{13}\text{C}$  NMR (125 MHz,  $\text{CDCl}_3$ ):  $\delta$  171.0, 154.9, 137.1, 131.6, 130.8, 129.7, 79.9, 53.2, 52.2, 37.7, 28.1, 20.9.

HRMS:  $m/z$  (ESI) Calculated for  $[\text{M}+\text{Na}]^+$  348.1245, Found 348.1258.

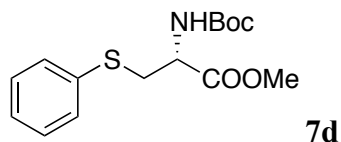

$^1\text{H}$  NMR (500 MHz,  $\text{CDCl}_3$ ):  $\delta$  7.41 (d,  $J = 8.0$  Hz, 2H), 7.28 (t,  $J = 8.0$  Hz, 2H), 7.21 (t,  $J = 7.5$  Hz, 1H), 5.39 (d,  $J = 7.0$  Hz, 1H), 4.56 (m, 1H), 3.53 (s, 3H), 3.37 (m, 2H), 1.42 (s, 9H).

$^{13}\text{C}$  NMR (125 MHz,  $\text{CDCl}_3$ ):  $\delta$  171.0, 155.0, 134.7, 131.0, 129.0, 127.0, 80.1, 53.2, 52.3, 37.2, 28.2.

HRMS:  $m/z$  (ESI) Calculated for  $[\text{M}+\text{Na}]^+$  334.1089, Found 334.1097.

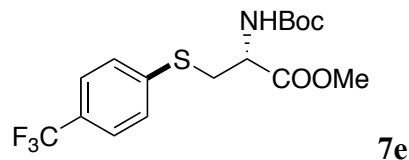

$^1\text{H}$  NMR (400 MHz,  $\text{CDCl}_3$ ):  $\delta$  7.52 (d,  $J = 8.4$  Hz, 2H), 7.46 (d,  $J = 8.4$  Hz, 2H), 5.34 (d,  $J = 6.4$  Hz, 1H), 4.56 (m, 1H), 3.59 (s, 3H), 3.35 (m, 2H), 1.41 (s, 9H).

$^{13}\text{C}$  NMR (125 MHz,  $\text{CDCl}_3$ ):  $\delta$  170.7, 154.9, 140.5, 129.3, 128.5 (q,  $J = 26.2$  Hz), 125.7, (d,  $J = 2.7$  Hz), 124.0 (q,  $J = 216.3$  Hz), 80.3, 53.3, 52.5, 36.0, 28.2.

HRMS:  $m/z$  (ESI) Calculated for  $[\text{M}+\text{Na}]^+$  402.0963, Found 402.0970.

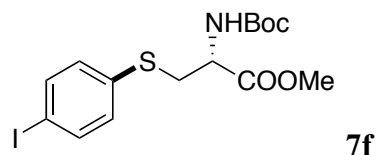

$^1\text{H}$  NMR (400 MHz,  $\text{CDCl}_3$ ):  $\delta$  7.60 (dd,  $J = 2.0, 6.8$  Hz, 2H), 7.14 (dt,  $J = 1.6, 6.8$  Hz, 2H), 5.29 (d,  $J = 8.0$  Hz, 1H), 4.57 (m, 1H), 3.60 (s, 3H), 3.37 (m, 2H), 1.42 (s, 9H).

$^{13}\text{C}$  NMR (125 MHz,  $\text{CDCl}_3$ ):  $\delta$  170.8, 154.8, 138.0, 132.5, 92.1, 80.2, 53.3, 52.5, 37.0, 28.2.

HRMS:  $m/z$  (ESI) Calculated for  $[\text{M}+\text{Na}]^+$  460.0055, Found 460.0063.

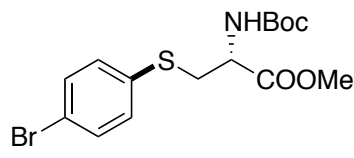

$^1\text{H}$  NMR (500 MHz,  $\text{CDCl}_3$ ):  $\delta$  7.40 (dt,  $J = 2.5, 9.0$  Hz, 2H), 7.27 (dt,  $J = 2.0, 8.5$  Hz, 2H), 5.35 (d,  $J = 7.5$  Hz, 1H), 4.56 (m, 1H), 3.59 (s, 3H), 3.35 (m, 2H), 1.41 (s, 9H).

$^{13}\text{C}$  NMR (125 MHz,  $\text{CDCl}_3$ ):  $\delta$  170.8, 154.8, 134.0, 132.4, 132.0, 120.9, 80.1, 53.2, 52.4, 37.1, 28.2.

HRMS:  $m/z$  (ESI) Calculated for  $[\text{M}+\text{Na}]^+$  412.0194, Found 412.0189.

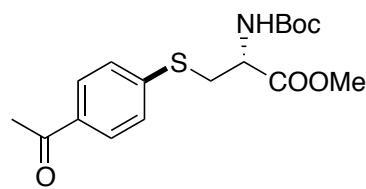

$^1\text{H}$  NMR (500 MHz,  $\text{CDCl}_3$ ):  $\delta$  7.87 (d,  $J = 8.5$  Hz, 2H), 7.40 (d,  $J = 8.5$  Hz, 2H), 5.32 (d,  $J = 7.5$  Hz, 1H), 4.57 (m, 1H), 3.56 (s, 3H), 3.37 (m, 2H), 2.57 (s, 3H), 1.41 (s, 9H).

$^{13}\text{C}$  NMR (125 MHz,  $\text{CDCl}_3$ ):  $\delta$  197.0, 170.7, 154.9, 142.4, 134.7, 128.8, 128.1, 80.3, 53.2, 52.6, 35.4, 28.2, 26.5.

HRMS:  $m/z$  (ESI) Calculated for  $[\text{M}+\text{Na}]^+$  376.1195, Found 376.1198.

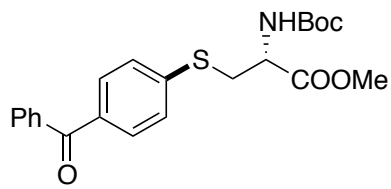

$^1\text{H}$  NMR (400 MHz,  $\text{CDCl}_3$ ):  $\delta$  7.76 (d,  $J = 7.6$  Hz, 2H), 7.73 (d,  $J = 8.4$  Hz, 2H), 7.59 (t,  $J = 7.6$  Hz, 1H), 7.49 (d,  $J = 7.6$  Hz, 2H), 7.43 (d,  $J = 8.4$  Hz, 2H), 5.41 (d,  $J = 6.8$  Hz, 1H), 4.65 (m, 1H), 3.66 (s, 3H), 3.47 (m, 2H), 1.43 (s, 9H).

$^{13}\text{C}$  NMR (125 MHz,  $\text{CDCl}_3$ ):  $\delta$  195.6, 170.8, 154.9, 141.6, 137.5, 135.0, 132.4, 130.6, 129.8, 128.3, 127.9, 80.3, 53.2, 52.5, 35.4, 28.2.

HRMS:  $m/z$  (ESI) Calculated for  $[\text{M}+\text{Na}]^+$  438.1351, Found 438.1350.

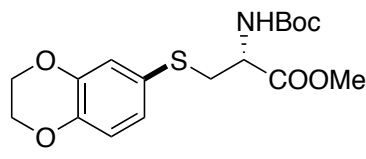

$^1\text{H}$  NMR (400 MHz,  $\text{CDCl}_3$ ):  $\delta$  6.97 (d,  $J = 2.0$  Hz, 1H), 6.92 (dd,  $J = 2.0, 6.4$  Hz, 1H), 6.78 (d,  $J = 6.8$  Hz, 1H), 5.34 (d,  $J = 5.6$  Hz, 1H), 4.51 (m, 1H), 4.23 (s, 4H), 3.61 (s, 3H), 3.26 (m, 2H), 1.42 (s, 9H).

$^{13}\text{C}$  NMR (125 MHz,  $\text{CDCl}_3$ ):  $\delta$  171.1, 154.9, 143.6, 143.4, 125.8, 121.4, 117.8, 79.9, 64.3, 64.2, 53.2, 52.3, 38.4, 28.2.

HRMS:  $m/z$  (ESI) Calculated for  $[\text{M}+\text{Na}]^+$  392.1144, Found 392.1130.

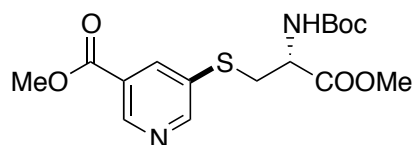

**7k**

$^1\text{H}$  NMR (500 MHz,  $\text{CDCl}_3$ ):  $\delta$  9.05 (s, 1H), 8.76 (d,  $J = 1.5$  Hz, 1H), 8.31 (s, 1H), 5.39 (d,  $J = 7.5$  Hz, 1H), 4.60 (m, 1H), 3.96 (s, 3H), 3.64 (s, 3H), 3.46 (m, 2H), 1.41 (s, 9H).

$^{13}\text{C}$  NMR (125 MHz,  $\text{CDCl}_3$ ):  $\delta$  170.6, 165.1, 154.6, 148.7, 138.6, 132.7, 126.1, 80.4, 53.2, 52.6, 36.9, 28.2.

HRMS:  $m/z$  (ESI) Calculated for  $[\text{M}+\text{Na}]^+$  393.1096, Found 393.1074.

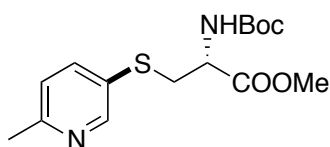

**7l**

$^1\text{H}$  NMR (400 MHz,  $\text{CDCl}_3$ ):  $\delta$  8.53 (s, 1H), 7.65 (dd,  $J = 1.6, 7.6$  Hz, 1H), 7.10 (d,  $J = 8.4$  Hz, 1H), 5.38 (d,  $J = 6.8$  Hz, 1H), 4.53 (m, 1H), 3.60 (s, 3H), 3.33 (m, 2H), 2.53 (s, 3H), 1.41 (s, 9H).

$^{13}\text{C}$  NMR (125 MHz,  $\text{CDCl}_3$ ):  $\delta$  170.6, 157.4, 154.8, 151.8, 139.8, 128.2, 123.4, 80.1, 53.2, 37.8, 28.2, 23.9.

HRMS:  $m/z$  (ESI) Calculated for  $[\text{M}+\text{Na}]^+$  349.1198, Found 349.1187.

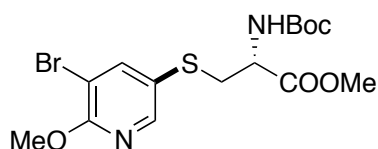

**7m**

$^1\text{H}$  NMR (400 MHz,  $\text{CDCl}_3$ ):  $\delta$  8.17 (dd,  $J = 1.6, 7.6$  Hz, 1H), 7.10 (d,  $J = 8.4$  Hz, 1H), 5.38 (d,  $J = 6.8$  Hz, 1H), 4.53 (m, 1H), 3.60 (s, 3H), 3.33 (m, 2H), 2.53 (s, 3H), 1.41 (s, 9H).

$^{13}\text{C}$  NMR (125 MHz,  $\text{CDCl}_3$ ):  $\delta$  170.8, 159.8, 154.8, 149.6, 145.9, 123.9, 106.9, 80.3, 54.7, 53.3, 52.5, 38.9, 28.2.

HRMS:  $m/z$  (ESI) Calculated for  $[\text{M}+\text{Na}]^+$  443.0252, Found 443.0250.

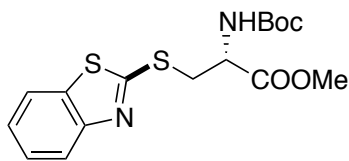

**7n**

$^1\text{H}$  NMR (500 MHz,  $\text{CDCl}_3$ ):  $\delta$  7.87 (d,  $J = 8.0$  Hz, 1H), 7.75 (d,  $J = 8.0$  Hz, 1H), 7.42 (t,  $J = 7.5$  Hz, 1H), 7.31 (t,  $J = 7.5$  Hz, 1H), 6.19 (d,  $J = 7.5$  Hz, 1H), 4.75 (dd,  $J = 5.5, 12.0$  Hz, 1H), 3.82 (d,  $J = 5.0$  Hz, 2H), 3.73 (s, 3H), 1.41 (s, 9H).

$^{13}\text{C}$  NMR (125 MHz,  $\text{CDCl}_3$ ):  $\delta$  170.9, 152.7, 135.5, 127.1, 126.2, 124.6, 121.6, 121.0, 111.8, 80.0, 53.9, 52.7, 35.4, 28.2.

HRMS:  $m/z$  (ESI) Calculated for  $[\text{M}+\text{Na}]^+$  391.0762, Found 391.0743.

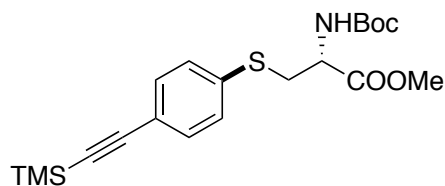

$^1\text{H}$  NMR (500 MHz,  $\text{CDCl}_3$ ):  $\delta$  7.35 (d,  $J$  = 8.5 Hz, 2H), 7.29 (d,  $J$  = 8.0 Hz, 2H), 5.32 (d,  $J$  = 7.5 Hz, 1H), 4.57 (m, 1H), 3.56 (s, 3H), 3.37 (m, 2H), 1.41 (s, 9H), 0.23 (s, 9H).

$^{13}\text{C}$  NMR (125 MHz,  $\text{CDCl}_3$ ):  $\delta$  170.8, 154.9, 135.8, 132.3, 129.8, 121.5, 104.4, 95.1, 80.2, 53.2, 52.4, 36.6, 28.2, -0.1.

HRMS:  $m/z$  (ESI) Calculated for  $[\text{M}+\text{Na}]^+$  430.1484, Found 430.1481.

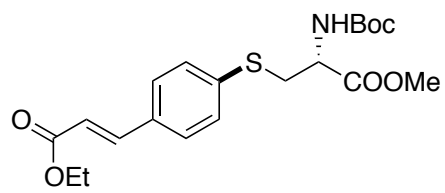

$^1\text{H}$  NMR (500 MHz,  $\text{CDCl}_3$ ):  $\delta$  7.68 (d,  $J$  = 16.5 Hz, 1H), 7.58 (s, 4H), 6.47 (d,  $J$  = 16.5 Hz, 1H), 5.53 (d,  $J$  = 7.5 Hz, 1H), 4.76 (m, 1H), 4.27 (q,  $J$  = 7.0 Hz, 2H), 3.96 (m, 2H), 3.73 (s, 3H), 1.42 (s, 9H), 1.34 (t,  $J$  = 7.5 Hz, 3H).

$^{13}\text{C}$  NMR (125 MHz,  $\text{CDCl}_3$ ):  $\delta$  170.9, 166.6, 154.9, 152.1, 143.2, 135.8, 128.8, 122.0, 119.4, 80.1, 60.6, 53.2, 52.6, 36.7, 28.2, 14.2.

HRMS:  $m/z$  (ESI) Calculated for  $[\text{M}+\text{Na}]^+$  432.1457, Found 432.1416.

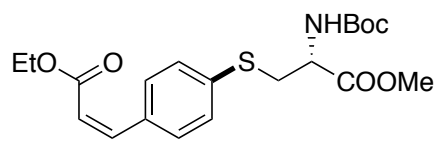

$^1\text{H}$  NMR (500 MHz,  $\text{CDCl}_3$ ):  $\delta$  7.62 (d,  $J$  = 15.5 Hz, 1H), 7.43 (d,  $J$  = 8.5 Hz, 2H), 7.37 (d,  $J$  = 8.0 Hz, 2H), 6.40 (d,  $J$  = 15.5 Hz, 1H), 5.38 (d,  $J$  = 7.5 Hz, 1H), 4.60 (m, 1H), 4.26 (q,  $J$  = 7.0 Hz, 2H), 3.60 (s, 3H), 3.41 (m, 2H), 1.41 (s, 9H), 1.34 (t,  $J$  = 7.0 Hz, 3H).

$^{13}\text{C}$  NMR (125 MHz,  $\text{CDCl}_3$ ):  $\delta$  170.7, 166.8, 154.8, 152.1, 143.5, 132.6, 129.8, 128.4, 118.1, 80.0, 60.5, 53.2, 52.4, 36.2, 28.2, 14.2.

HRMS:  $m/z$  (ESI) Calculated for  $[\text{M}+\text{Na}]^+$  432.1457, Found 432.1416.



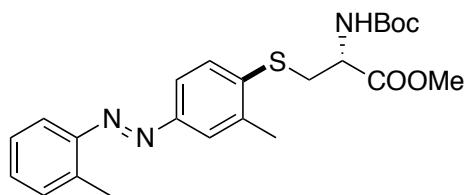

**(E)-7q**

$^1\text{H NMR}$  (400 MHz,  $\text{CDCl}_3$ ):  $\delta$  7.73 (s, 1H), 7.72 (d,  $J = 8.0$  Hz, 1H), 7.60 (d,  $J = 8.4$  Hz, 1H), 7.46 (d,  $J = 8.0$  Hz, 1H), 7.33 (m, 2H), 7.24 (m, 1H), 5.38 (d,  $J = 7.6$  Hz, 1H), 4.65 (m, 1H), 3.63 (s, 3H), 3.45 (m, 2H), 2.71 (s, 3H), 2.47 (s, 3H), 1.43 (s, 9H).

$^{13}\text{C NMR}$  (100 MHz,  $\text{CDCl}_3$ ):  $\delta$  170.9, 154.9, 151.2, 150.7, 138.7, 138.0, 131.2, 130.8, 129.2, 129.1, 126.3, 124.4, 121.0, 115.3, 80.2, 53.2, 52.5, 35.8, 29.6, 28.2, 20.6, 17.4.

HRMS:  $m/z$  (ESI) Calculated for  $[\text{M}+\text{Na}]^+$  466.1776, Found 446.1752.

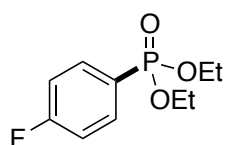

**8a**

$^1\text{H NMR}$  (400 MHz,  $\text{CDCl}_3$ ):  $\delta$  7.83 (ddd,  $J = 5.6, 8.4, 13.6$  Hz, 2H), 7.15 (ddd,  $J = 3.2, 9.2$  Hz, 2H), 4.12 (m, 4H), 1.33 (t,  $J = 7.2$  Hz, 6H).

$^{13}\text{C NMR}$  (100 MHz,  $\text{CDCl}_3$ ):  $\delta$  165.3 (d,  $J = 199.3$  Hz), 134.3 (t,  $J = 9.1$  Hz), 124.4 (d,  $J = 150.7$  Hz), 115.8 (dd,  $J = 12.9, 16.6$  Hz), 62.1 (d,  $J = 3.8$  Hz), 16.2 (d,  $J = 4.9$  Hz).

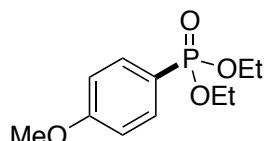

**8b**

$^1\text{H NMR}$  (400 MHz,  $\text{CDCl}_3$ ):  $\delta$  7.75 (dd,  $J = 8.8, 12.4$  Hz, 2H), 6.97 (dd,  $J = 3.6, 8.8$  Hz, 2H), 4.09 (m, 4H), 3.85 (s, 3H), 1.31 (t,  $J = 6.8$  Hz, 6H).

$^{13}\text{C NMR}$  (125 MHz,  $\text{CDCl}_3$ ):  $\delta$  162.8, 133.8 (d,  $J = 11.4$  Hz), 119.5 (d,  $J = 193.6$  Hz), 114.0 (d,  $J = 15.6$  Hz), 61.9 (d,  $J = 5.2$  Hz), 53.3, 16.3 (d,  $J = 6.6$  Hz).

HRMS:  $m/z$  (ESI) Calculated for  $[\text{M}+\text{H}]^+$  245.0943, Found 245.0931.

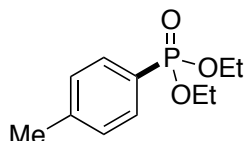

**8c**

$^1\text{H NMR}$  (400 MHz,  $\text{CDCl}_3$ ):  $\delta$  7.70 (dd,  $J = 8.0, 13.0$  Hz, 2H), 7.27 (dd,  $J = 3.5, 8.0$  Hz, 2H), 4.10 (m, 4H), 2.40 (s, 3H), 1.31 (t,  $J = 7.0$  Hz, 6H).

$^{13}\text{C NMR}$  (100 MHz,  $\text{CDCl}_3$ ):  $\delta$  142.9 (d,  $J = 2.3$  Hz), 131.8 (t,  $J = 7.9$  Hz), 129.2 (d,  $J = 12.1$  Hz), 124.9 (d,  $J = 155.0$  Hz), 61.9 (d,  $J = 4.2$  Hz), 21.6, 16.3 (d,  $J = 5.3$  Hz).

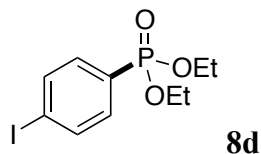

$^1\text{H NMR}$  (400 MHz,  $\text{CDCl}_3$ ):  $\delta$  7.83 (dd,  $J = 3.6, 8.4$  Hz, 2H), 7.52 (dd,  $J = 8.0, 12.8$  Hz, 2H), 4.11 (m, 4H), 1.32 (t,  $J = 7.2$  Hz, 6H).

$^{13}\text{C NMR}$  (125 MHz,  $\text{CDCl}_3$ ):  $\delta$  137.7 (d,  $J = 15.2$  Hz), 133.1 (d,  $J = 10.4$  Hz), 128.0 (d,  $J = 188.8$  Hz), 100.1 (d,  $J = 3.9$  Hz), 62.3 (d,  $J = 5.3$  Hz), 16.3 (d,  $J = 6.2$  Hz).

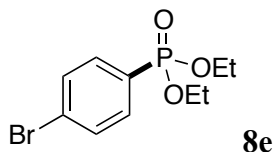

$^1\text{H NMR}$  (400 MHz,  $\text{CDCl}_3$ ):  $\delta$  7.65 (m, 4H), 4.12 (m, 4H), 1.32 (t,  $J = 7.2$  Hz, 6H).

$^{13}\text{C NMR}$  (100 MHz,  $\text{CDCl}_3$ ):  $\delta$  133.2 (d,  $J = 8.3$  Hz), 131.7 (d,  $J = 12.1$  Hz), 127.5 (d,  $J = 3.1$  Hz), 127.4 (d,  $J = 151.9$  Hz), 62.2 (d,  $J = 4.2$  Hz), 16.2 (d,  $J = 5.4$  Hz).

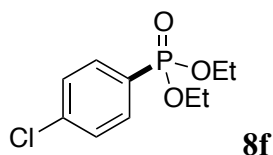

$^1\text{H NMR}$  (400 MHz,  $\text{CDCl}_3$ ):  $\delta$  7.75 (dd,  $J = 8.4, 13.2$  Hz, 2H), 7.45 (dd,  $J = 3.6, 8.4$  Hz, 2H), 4.11 (m, 4H), 1.32 (t,  $J = 7.2$  Hz, 6H).

$^{13}\text{C NMR}$  (100 MHz,  $\text{CDCl}_3$ ):  $\delta$  138.9 (d,  $J = 3.0$  Hz), 133.1 (d,  $J = 8.7$  Hz), 128.8 (d,  $J = 12.5$  Hz), 126.9 (d,  $J = 151.8$  Hz), 62.2 (d,  $J = 4.2$  Hz), 16.2 (d,  $J = 5.4$  Hz).

HRMS:  $m/z$  (ESI) Calculated for  $[\text{M}+\text{H}]^+$  249.0447, Found 249.0439.

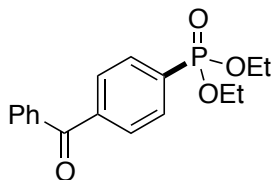

$^1\text{H NMR}$  (500 MHz,  $\text{CDCl}_3$ ):  $\delta$  7.94 (dd,  $J = 8.0, 12.8$  Hz, 1H), 7.85 (m, 1H), 7.81 (m, 3H), 7.63 (m, 2H), 7.51 (m, 2H), 4.15 (m, 4H), 1.36 (t,  $J = 7.2$  Hz, 6H).

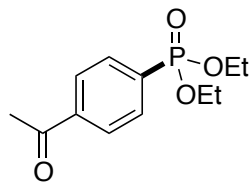

$^1\text{H NMR}$  (400 MHz,  $\text{CDCl}_3$ ):  $\delta$  7.75 (dd,  $J = 8.4, 13.2$  Hz, 2H), 7.45 (dd,  $J = 3.6, 8.4$  Hz, 2H), 4.11 (m, 4H), 1.32 (t,  $J = 7.2$  Hz, 6H).

$^{13}\text{C NMR}$  (125 MHz,  $\text{CDCl}_3$ ):  $\delta$  138.9 (d,  $J = 3.0$  Hz), 133.1 (d,  $J = 8.7$  Hz), 128.8 (d,  $J = 12.5$  Hz), 126.9 (d,  $J = 151.8$  Hz), 62.2 (d,  $J = 4.2$  Hz), 16.2 (d,  $J = 5.4$  Hz).

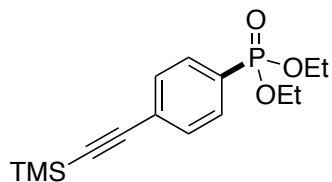

$^1\text{H}$  NMR (500 MHz,  $\text{CDCl}_3$ ):  $\delta$  7.74 (dd,  $J = 8.5, 13.5$  Hz, 2H), 7.54 (dd,  $J = 3.5, 8.5$  Hz, 2H), 4.10 (m, 4H), 1.32 (t,  $J = 7.2$  Hz, 6H), 0.25 (s, 9H).

$^{13}\text{C}$  NMR (125 MHz,  $\text{CDCl}_3$ ):  $\delta$  131.8 (d,  $J = 14.6$  Hz), 131.5 (d,  $J = 9.9$  Hz), 128.2 (d,  $J = 188.3$  Hz), 127.3 (d,  $J = 3.3$  Hz), 103.8, 97.4, 62.2 (d,  $J = 5.3$  Hz), 16.3 (d,  $J = 6.7$  Hz), -0.2.

HRMS:  $m/z$  (ESI) Calculated for  $[\text{M}+\text{H}]^+$  311.1232, Found 311.1220.

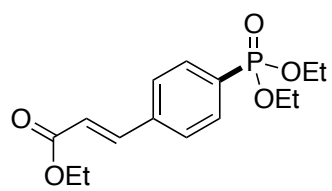

$^1\text{H}$  NMR (400 MHz,  $\text{CDCl}_3$ ):  $\delta$  7.83 (dd,  $J = 8.0, 12.8$  Hz, 2H), 7.78 (d,  $J = 16.0$  Hz, 1H), 7.60 (dd,  $J = 3.6, 8.0$  Hz, 2H), 6.51 (d,  $J = 16.0$  Hz, 1H), 4.28 (q,  $J = 7.2$  Hz, 2H), 4.13 (m, 4H), 1.35 (t,  $J = 7.2$  Hz, 3H), 1.33 (t,  $J = 7.2$  Hz, 6H).

$^{13}\text{C}$  NMR (125 MHz,  $\text{CDCl}_3$ ):  $\delta$  166.5, 143.1, 138.2 (d,  $J = 3.3$  Hz), 132.3 (d,  $J = 10.0$  Hz), 127.8 (d,  $J = 15.2$  Hz), 120.7, 130.1 (d,  $J = 187.9$  Hz), 62.3 (d,  $J = 5.6$  Hz), 60.8, 16.3 (d,  $J = 6.6$  Hz), 14.3.

HRMS:  $m/z$  (ESI) Calculated for  $[\text{M}+\text{H}]^+$  313.1205, Found 313.1200.

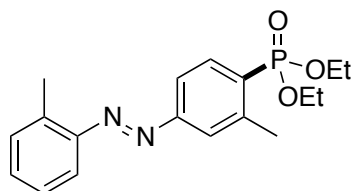

$^1\text{H}$  NMR (500 MHz,  $\text{CDCl}_3$ ):  $\delta$  8.07 (dd,  $J = 8.5, 13.5$  Hz, 1H), 7.76 (m, 2H), 7.76 (d,  $J = 8.0$  Hz, 1H), 7.38 (m, 2H), 7.27 (dt,  $J = 2.0, 8.0$  Hz, 1H), 4.16 (m, 4H), 2.74 (s, 3H), 2.69 (s, 3H), 1.36 (t,  $J = 6.5$  Hz, 6H).

$^{13}\text{C}$  NMR (125 MHz,  $\text{CDCl}_3$ ):  $\delta$  155.0 (d,  $J = 4.3$  Hz), 150.7, 143.1, 138.7, 135.0 (d,  $J = 13.6$  Hz), 130.2 (d,  $J = 188.6$  Hz), 131.4, 126.4, 125.4 (d,  $J = 19.5$  Hz), 119.4 (d,  $J = 19.0$  Hz), 115.4, 62.0 (d,  $J = 6.6$  Hz), 21.3 (d,  $J = 4.2$  Hz), 17.6, 16.3 (d,  $J = 7.8$  Hz).

HRMS:  $m/z$  (ESI) Calculated for  $[\text{M}+\text{H}]^+$  347.1525, Found 347.1510.

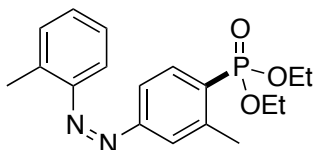

$^1\text{H}$  NMR (500 MHz,  $\text{CDCl}_3$ ):  $\delta$  7.72 (dd,  $J = 8.0, 13.5$  Hz, 1H), 7.18 (d,  $J = 8.0$  Hz, 1H), 7.06 (t,  $J = 7.5$  Hz, 1H), 6.91 (t,  $J = 8.0$  Hz, 1H), 6.83 (dd,  $J = 1.5, 5.0$  Hz, 1H), 6.54 (dt,  $J = 2.5, 7.5$  Hz, 1H), 6.19 (d,  $J = 8.0$  Hz, 1H), 4.09 (m, 4H), 2.49 (s, 3H), 2.33 (s, 3H), 1.30 (t,  $J = 6.5$  Hz, 6H).

$^{13}\text{C}$  NMR (125 MHz,  $\text{CDCl}_3$ ):  $\delta$  156.5 (d,  $J = 4.3$  Hz), 152.8, 143.2, 141.4, 134.3 (d,  $J = 13.6$  Hz), 131.1 (d,  $J = 188.6$  Hz), 128.2, 127.7, 125.9, 123.1 (d,  $J = 19.0$  Hz), 117.1, 115.8 (d,  $J = 19.5$  Hz), 62.0 (d,  $J = 6.6$  Hz), 21.2 (d,  $J = 4.2$  Hz), 17.5, 16.2 (d,  $J = 7.8$  Hz).

HRMS:  $m/z$  (ESI) Calculated for  $[\text{M}+\text{H}]^+$  347.1525, Found 347.1510.

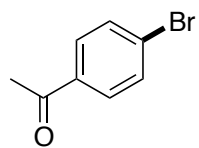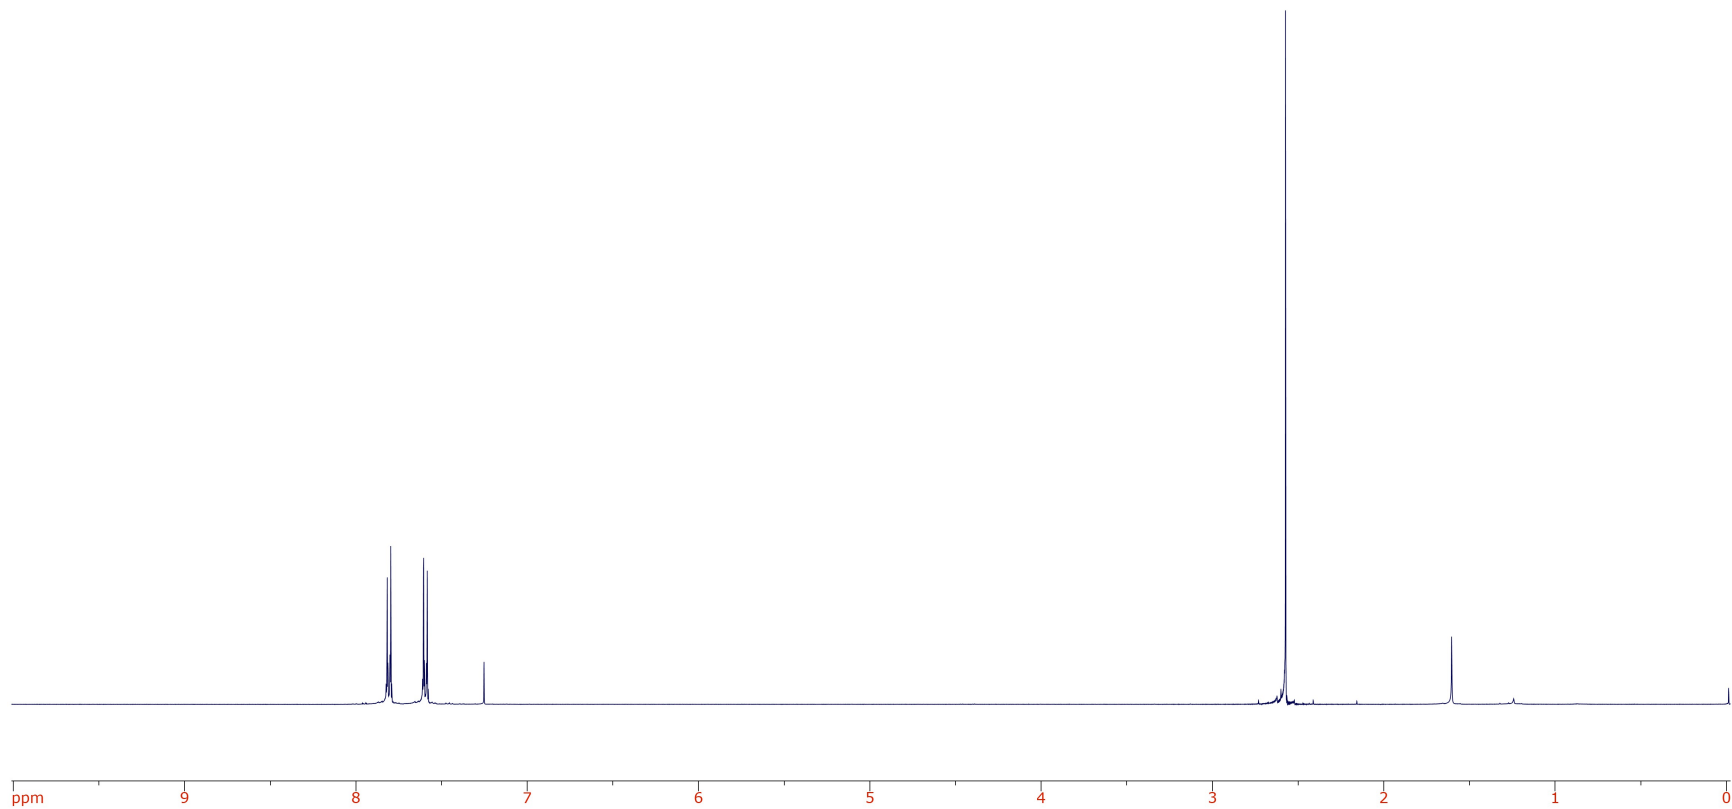

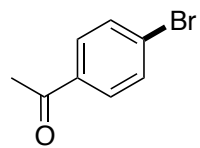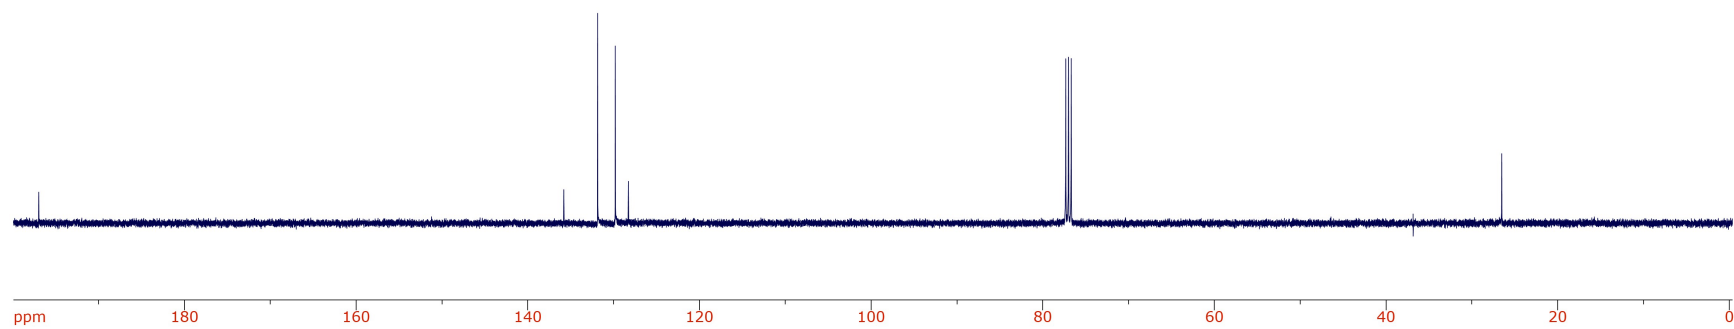

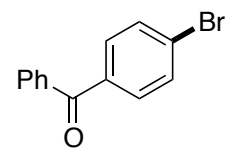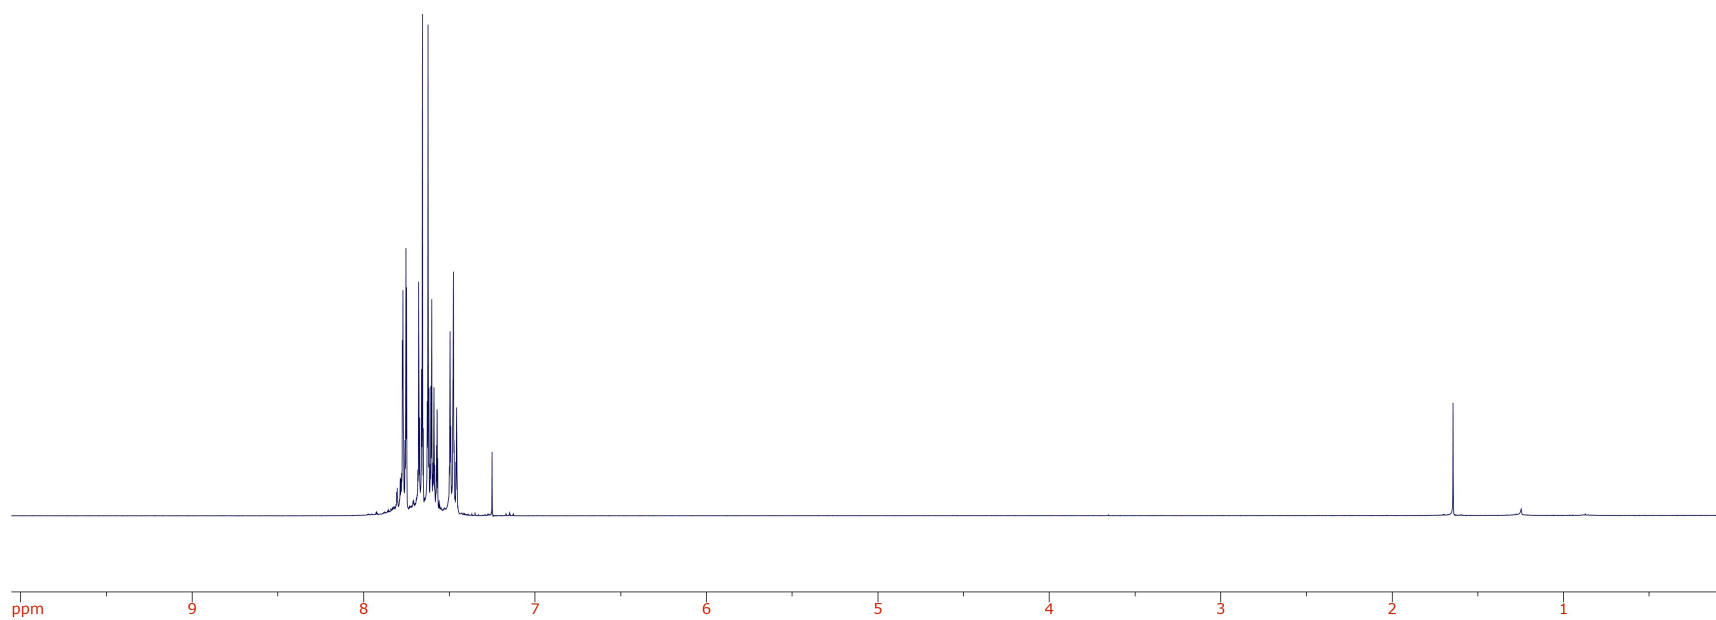

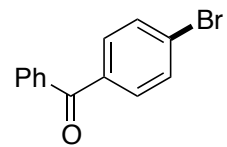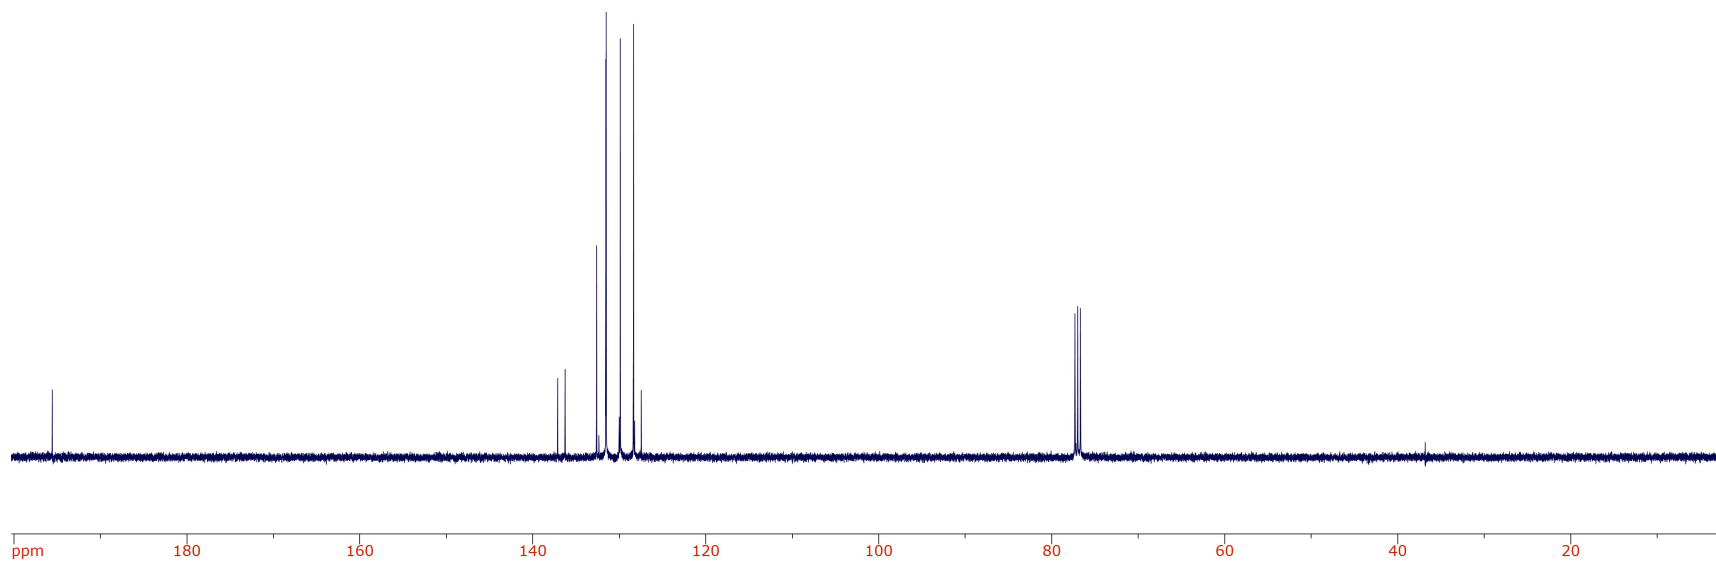



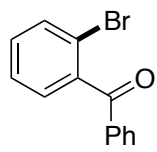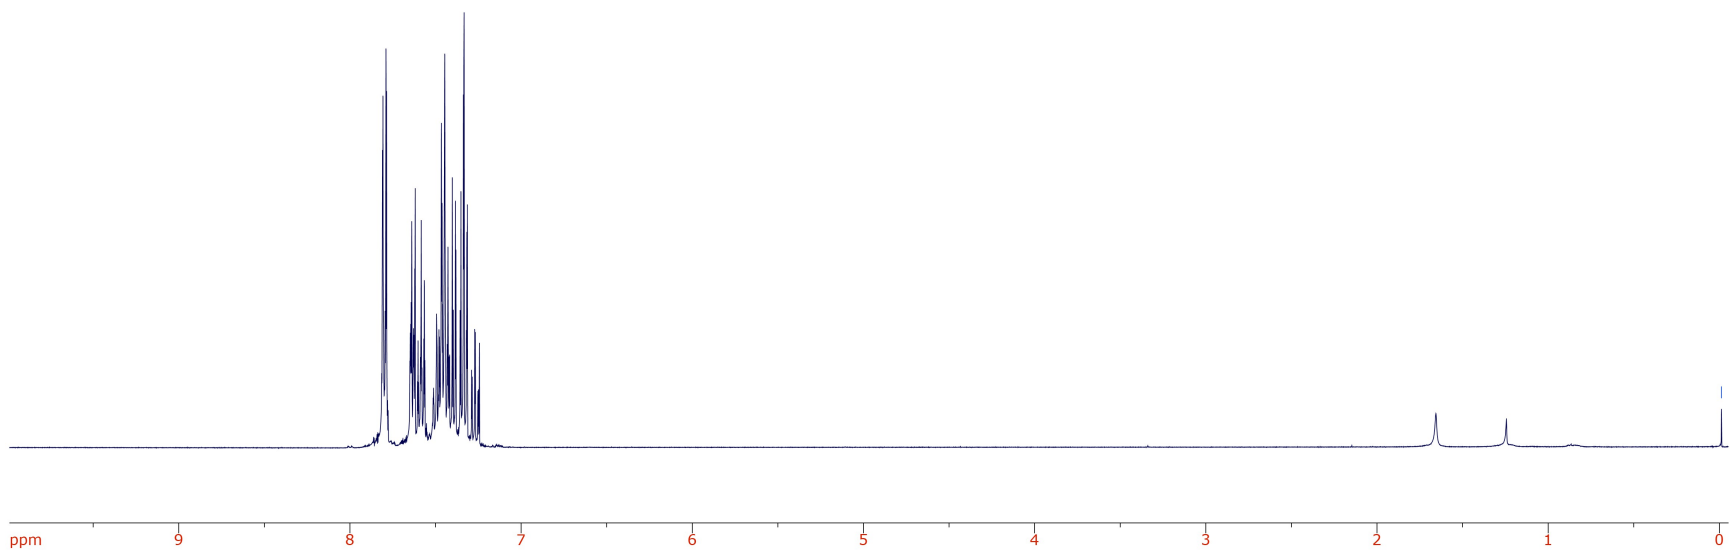

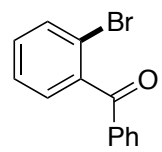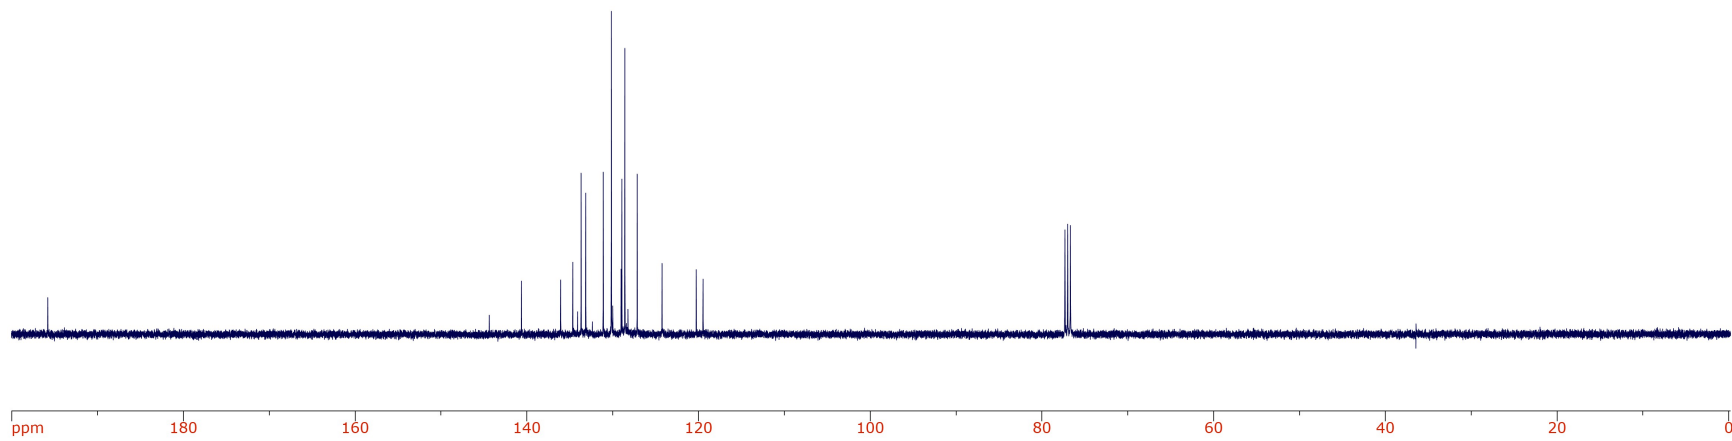

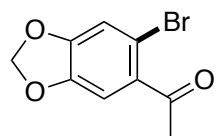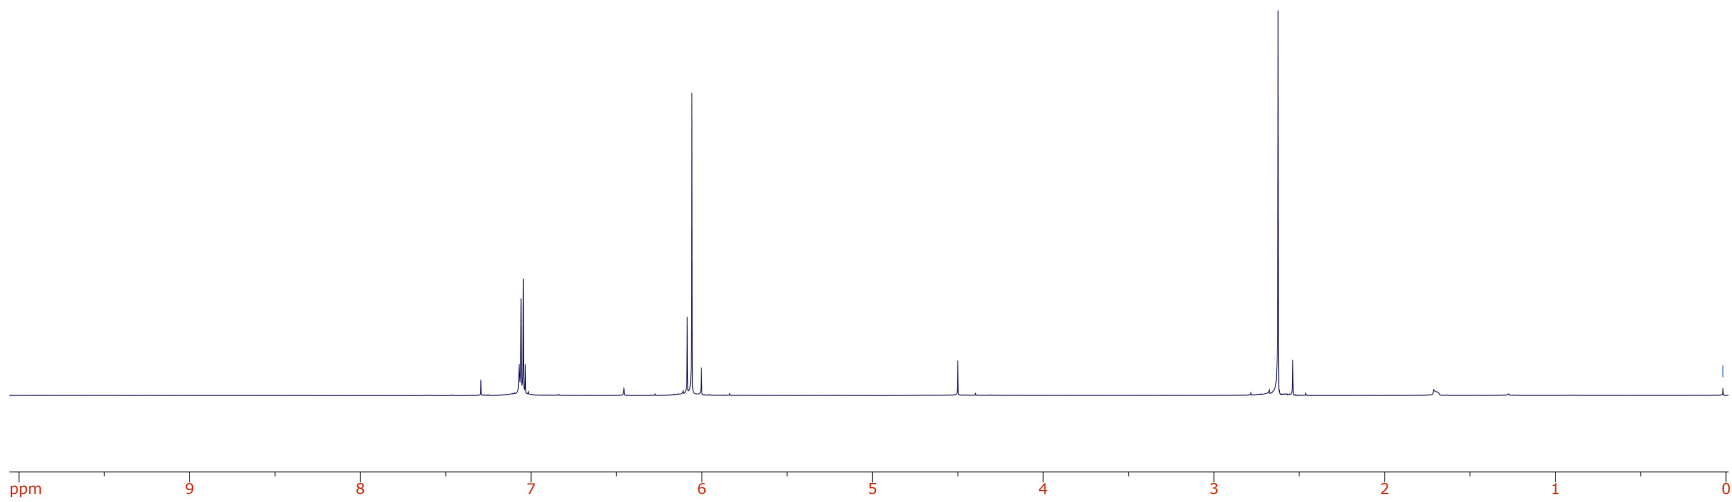

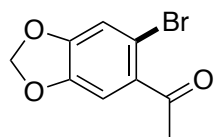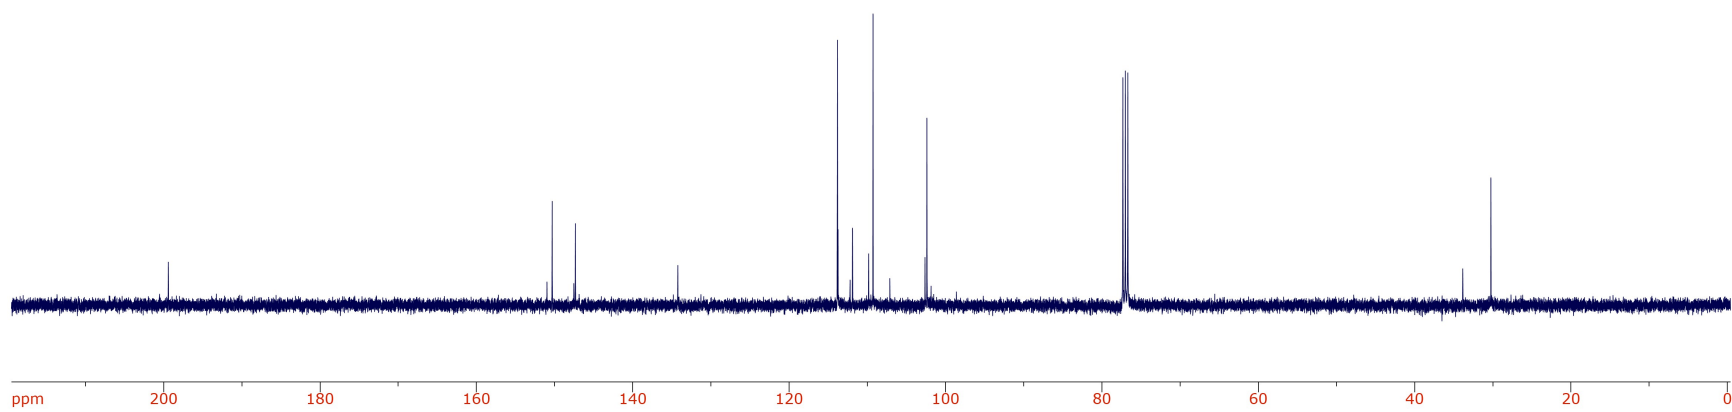

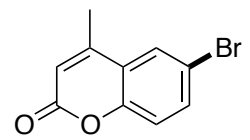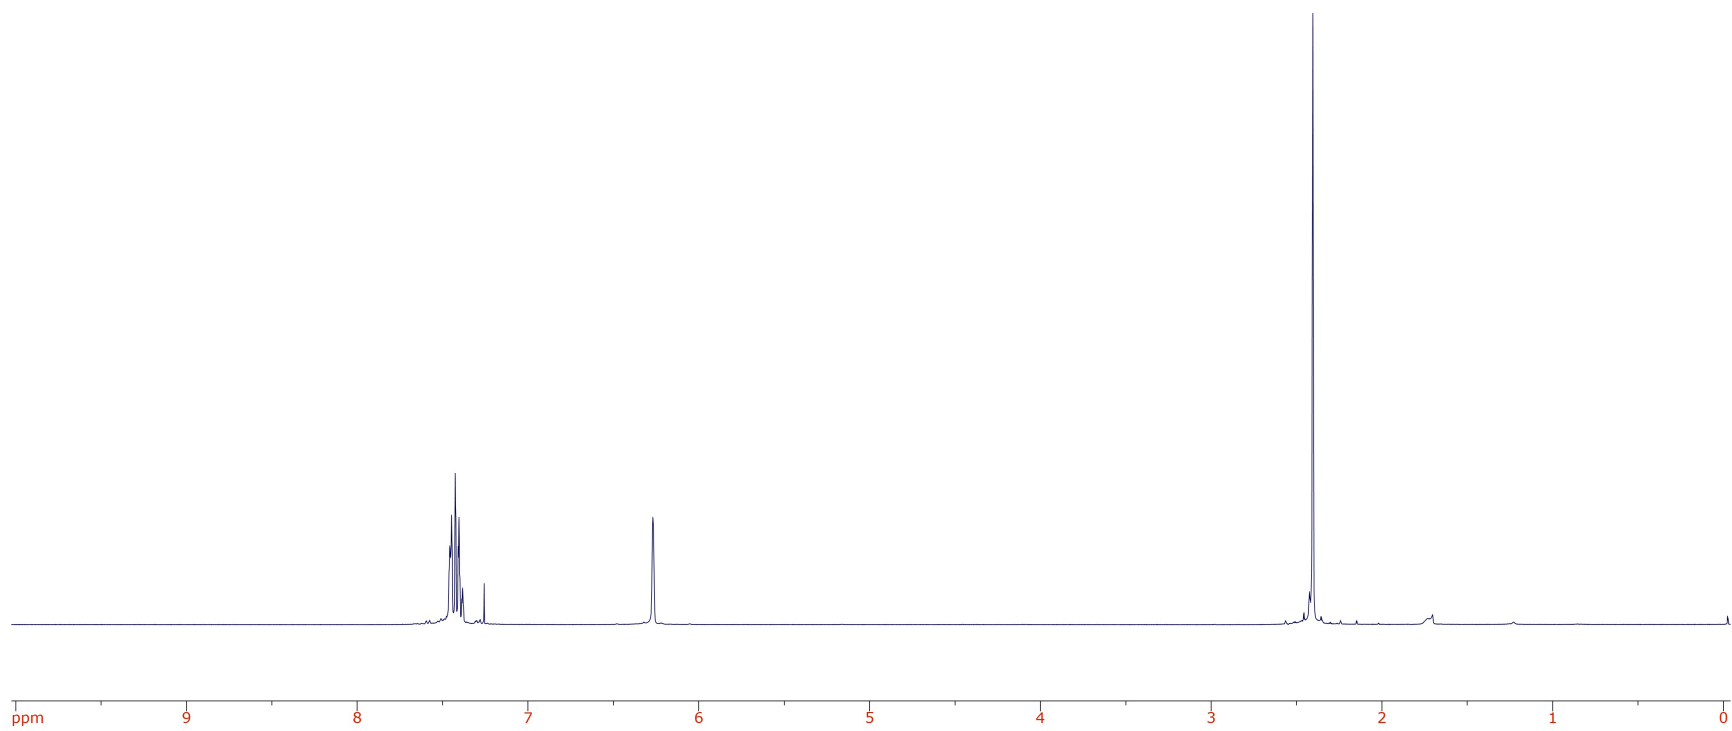

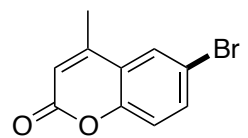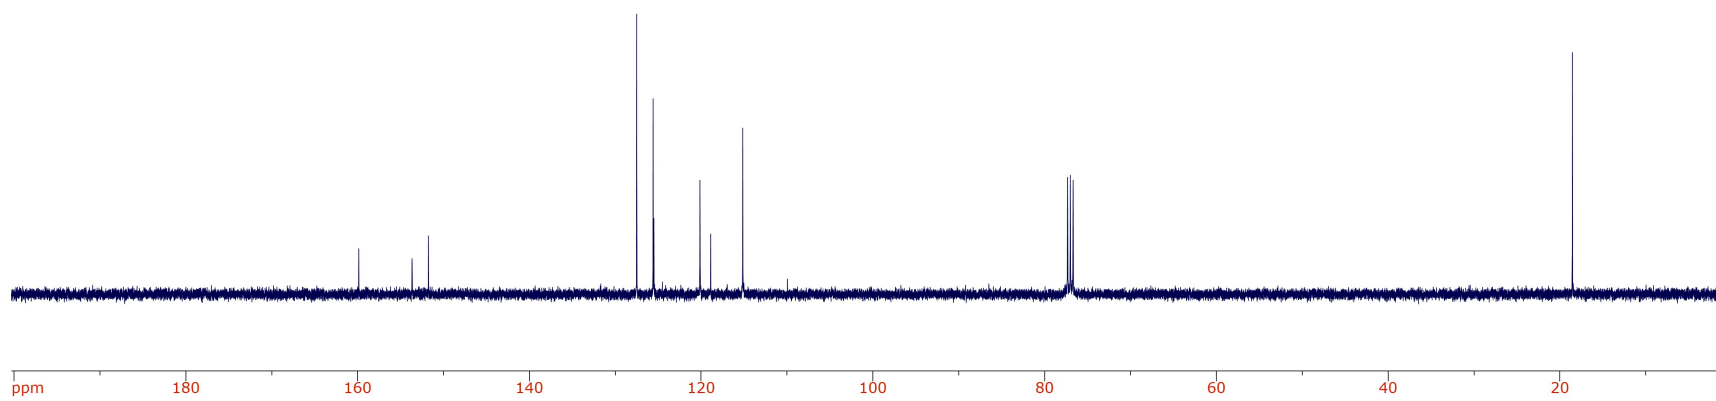

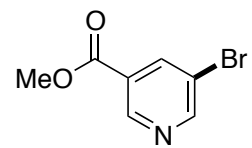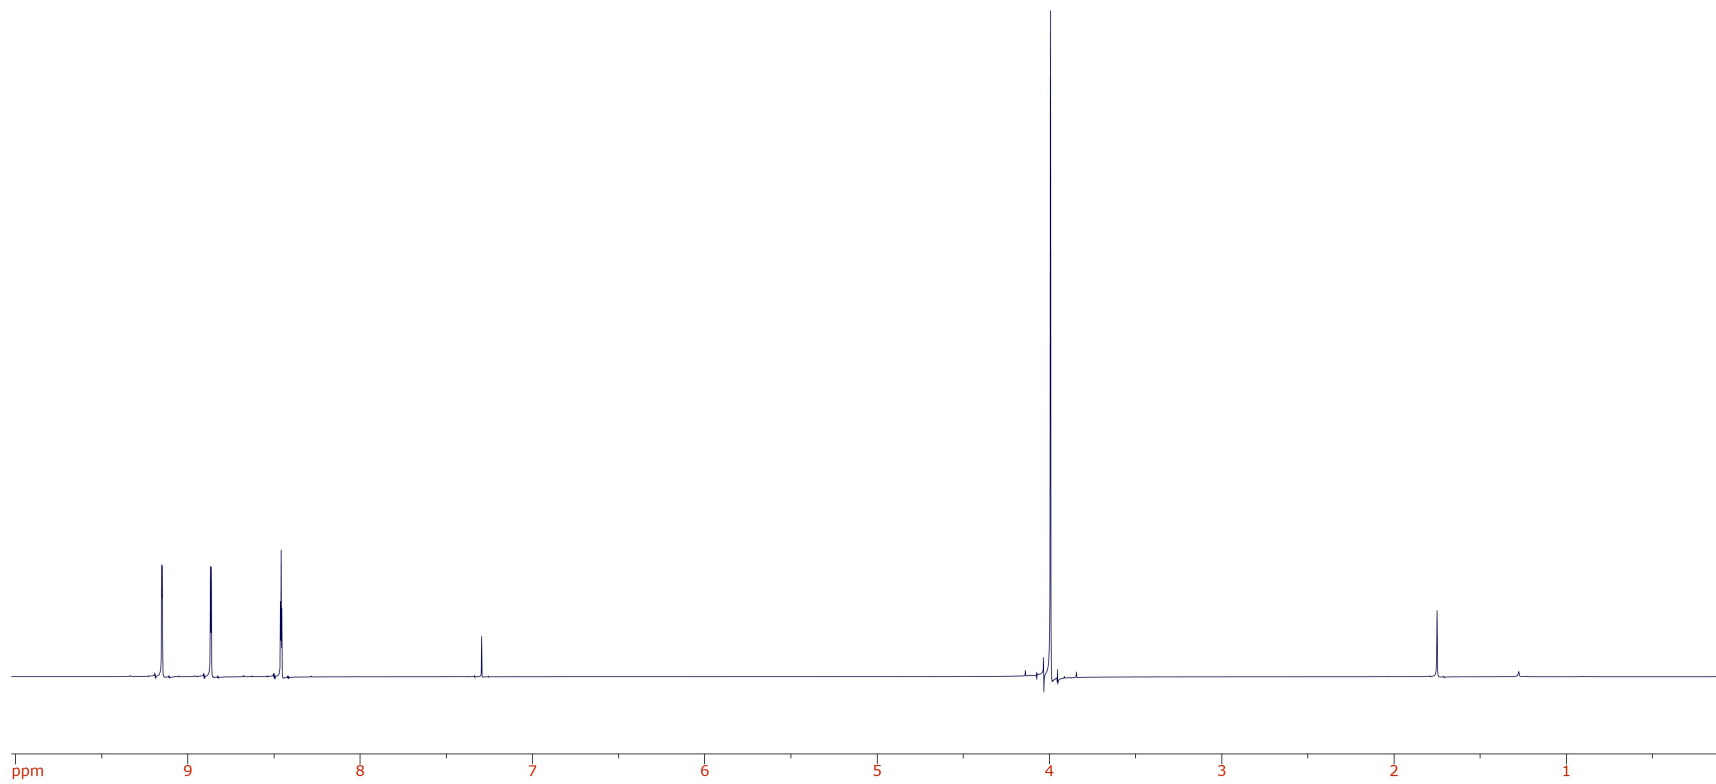

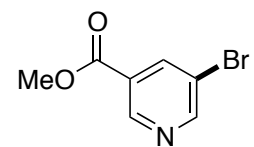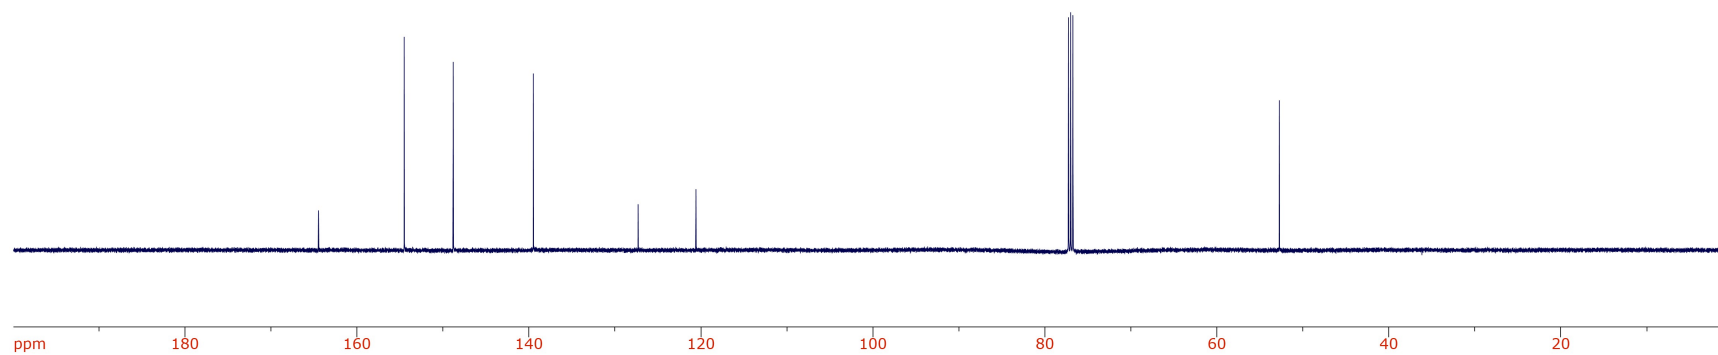



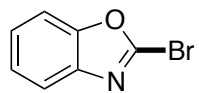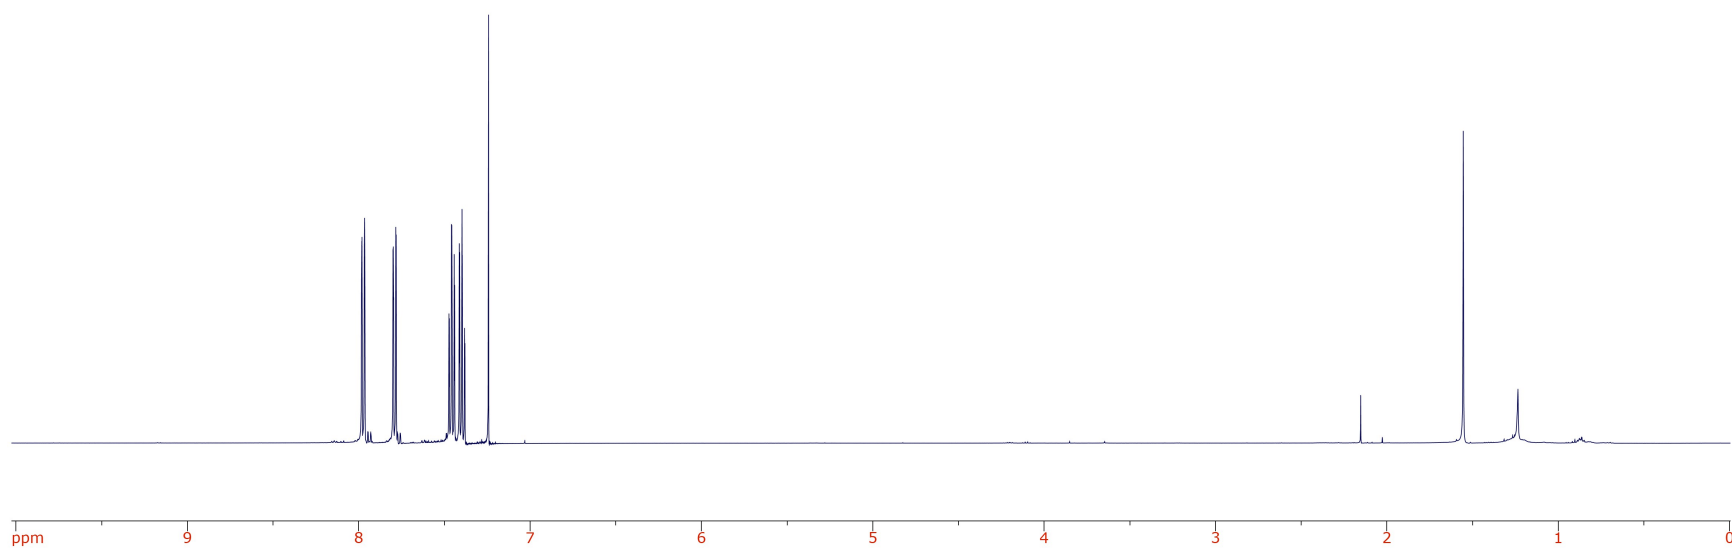

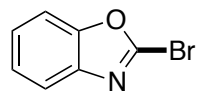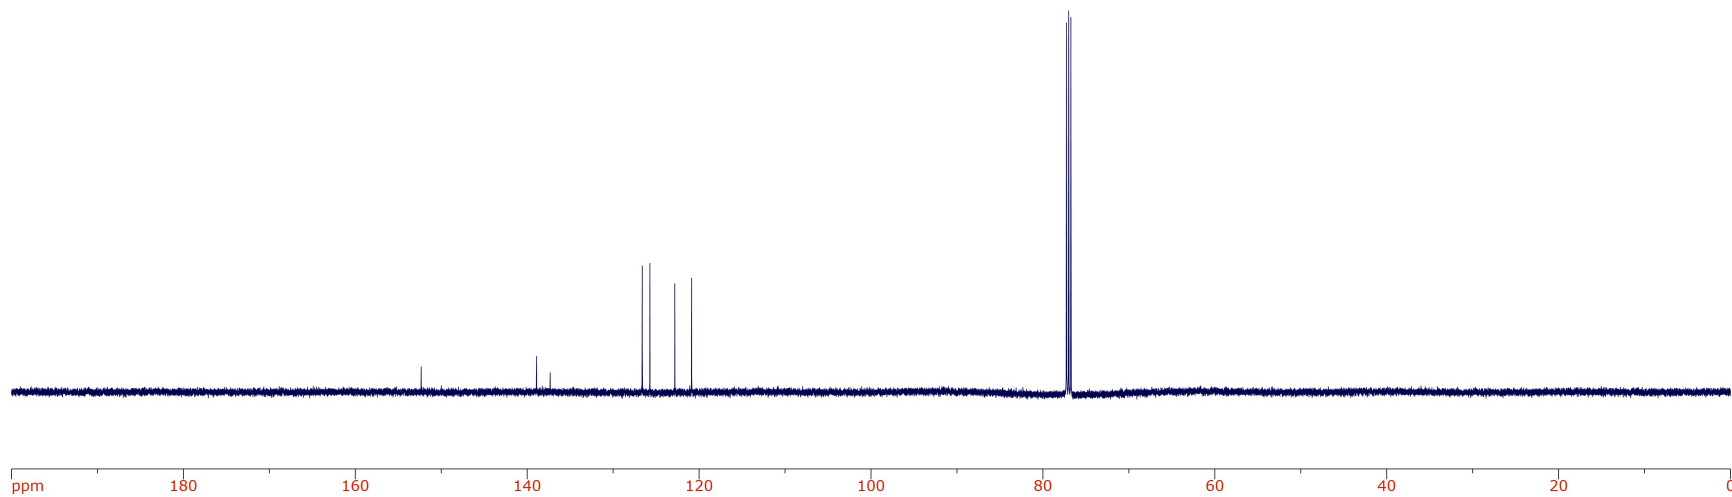

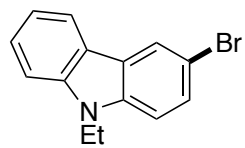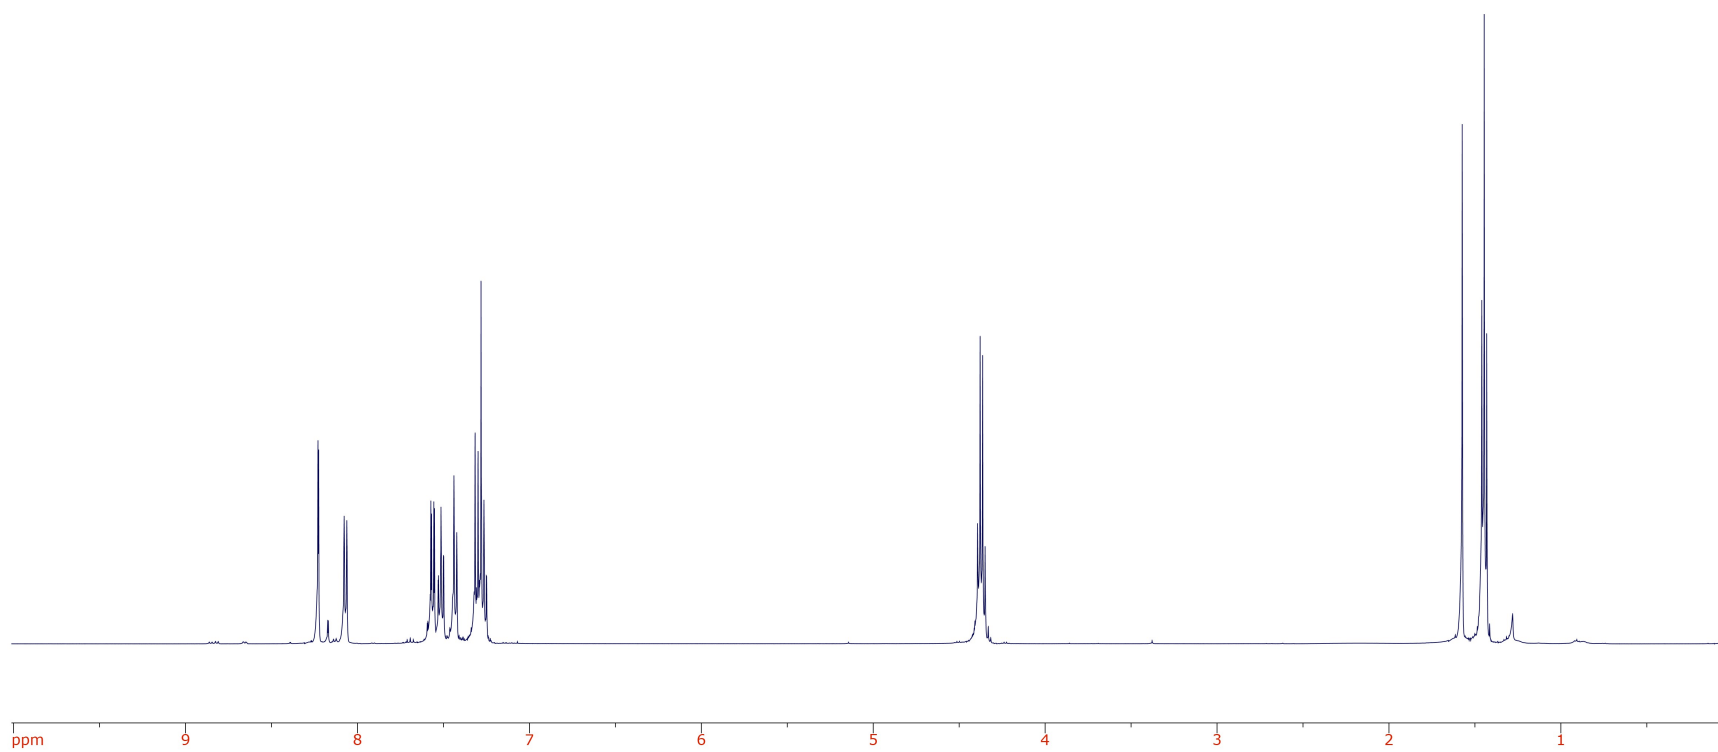

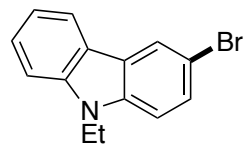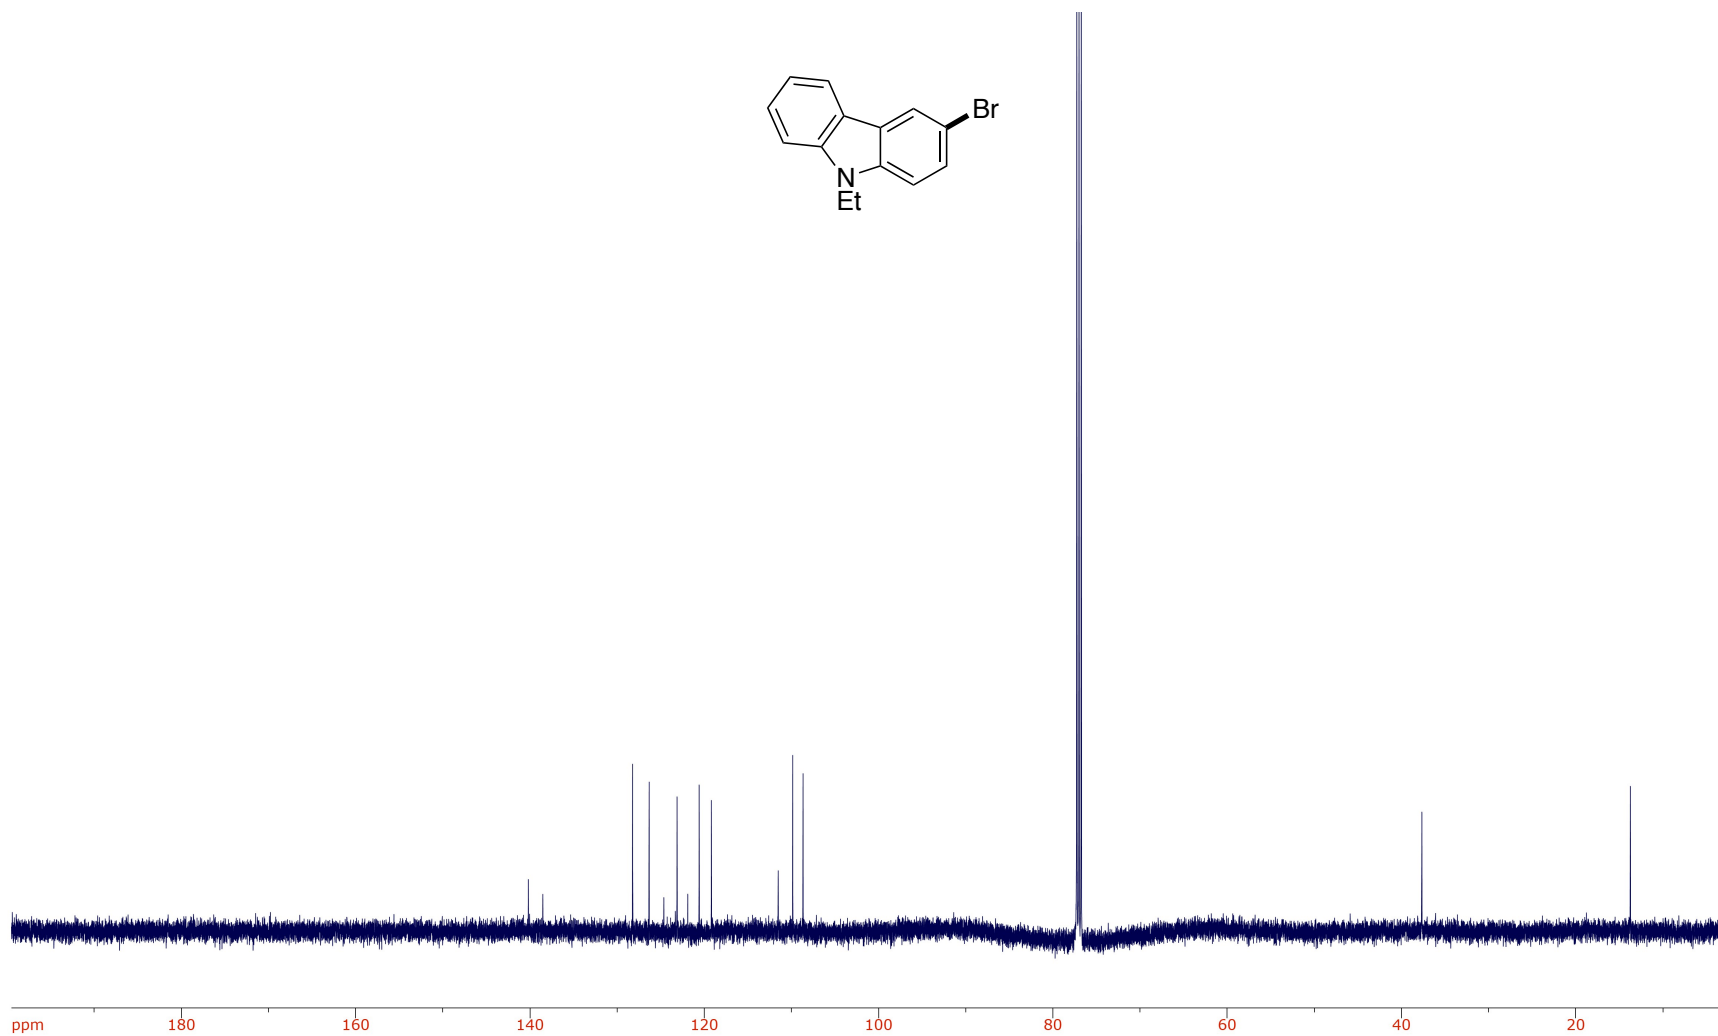

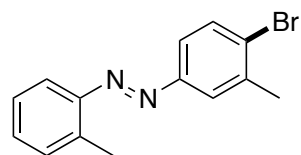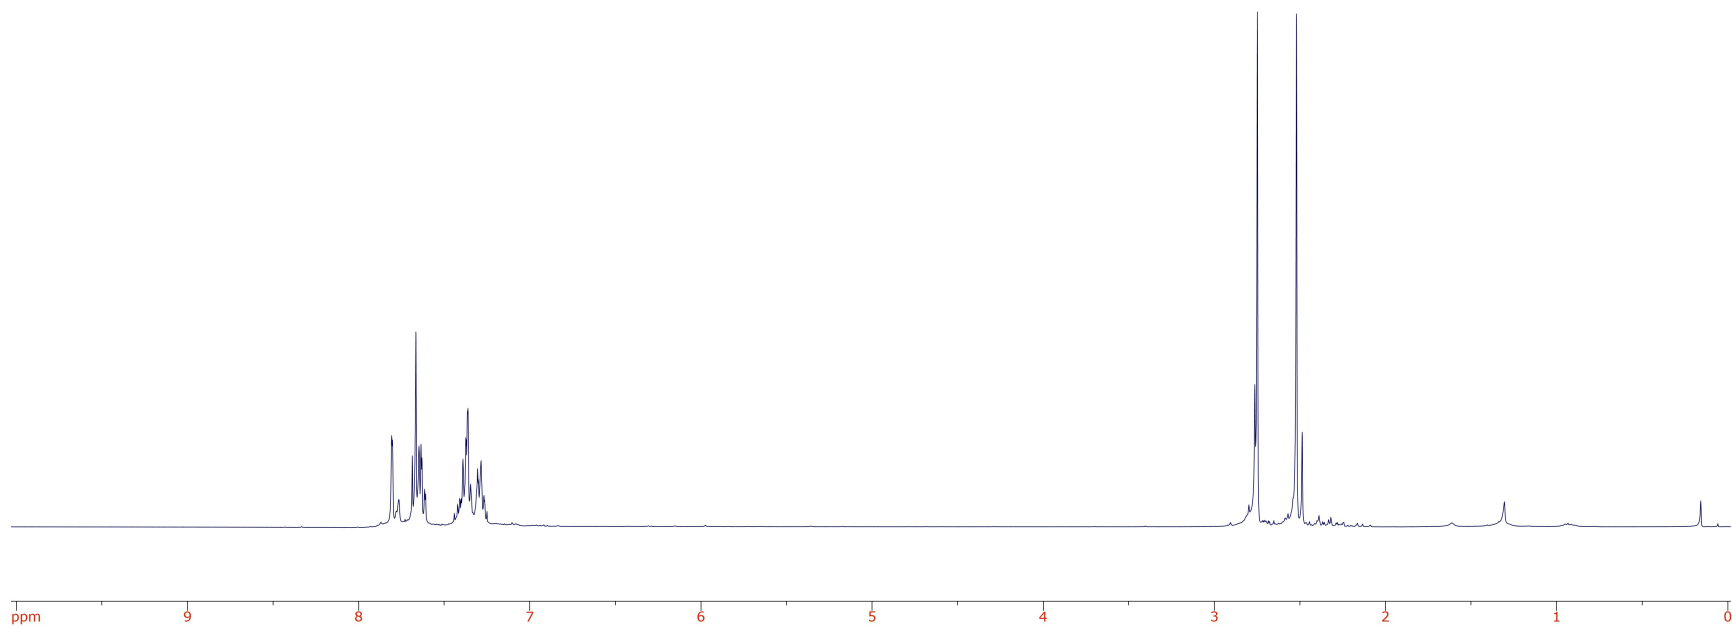

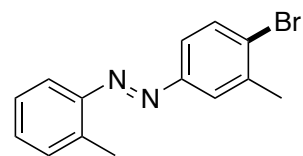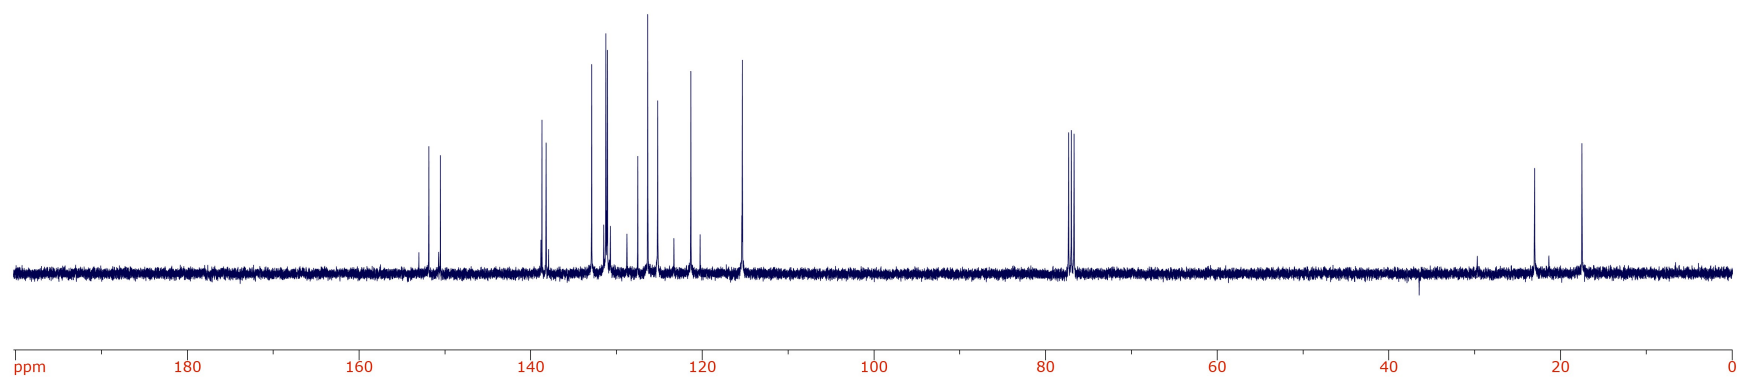

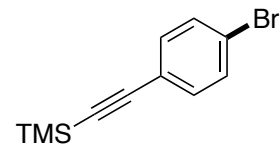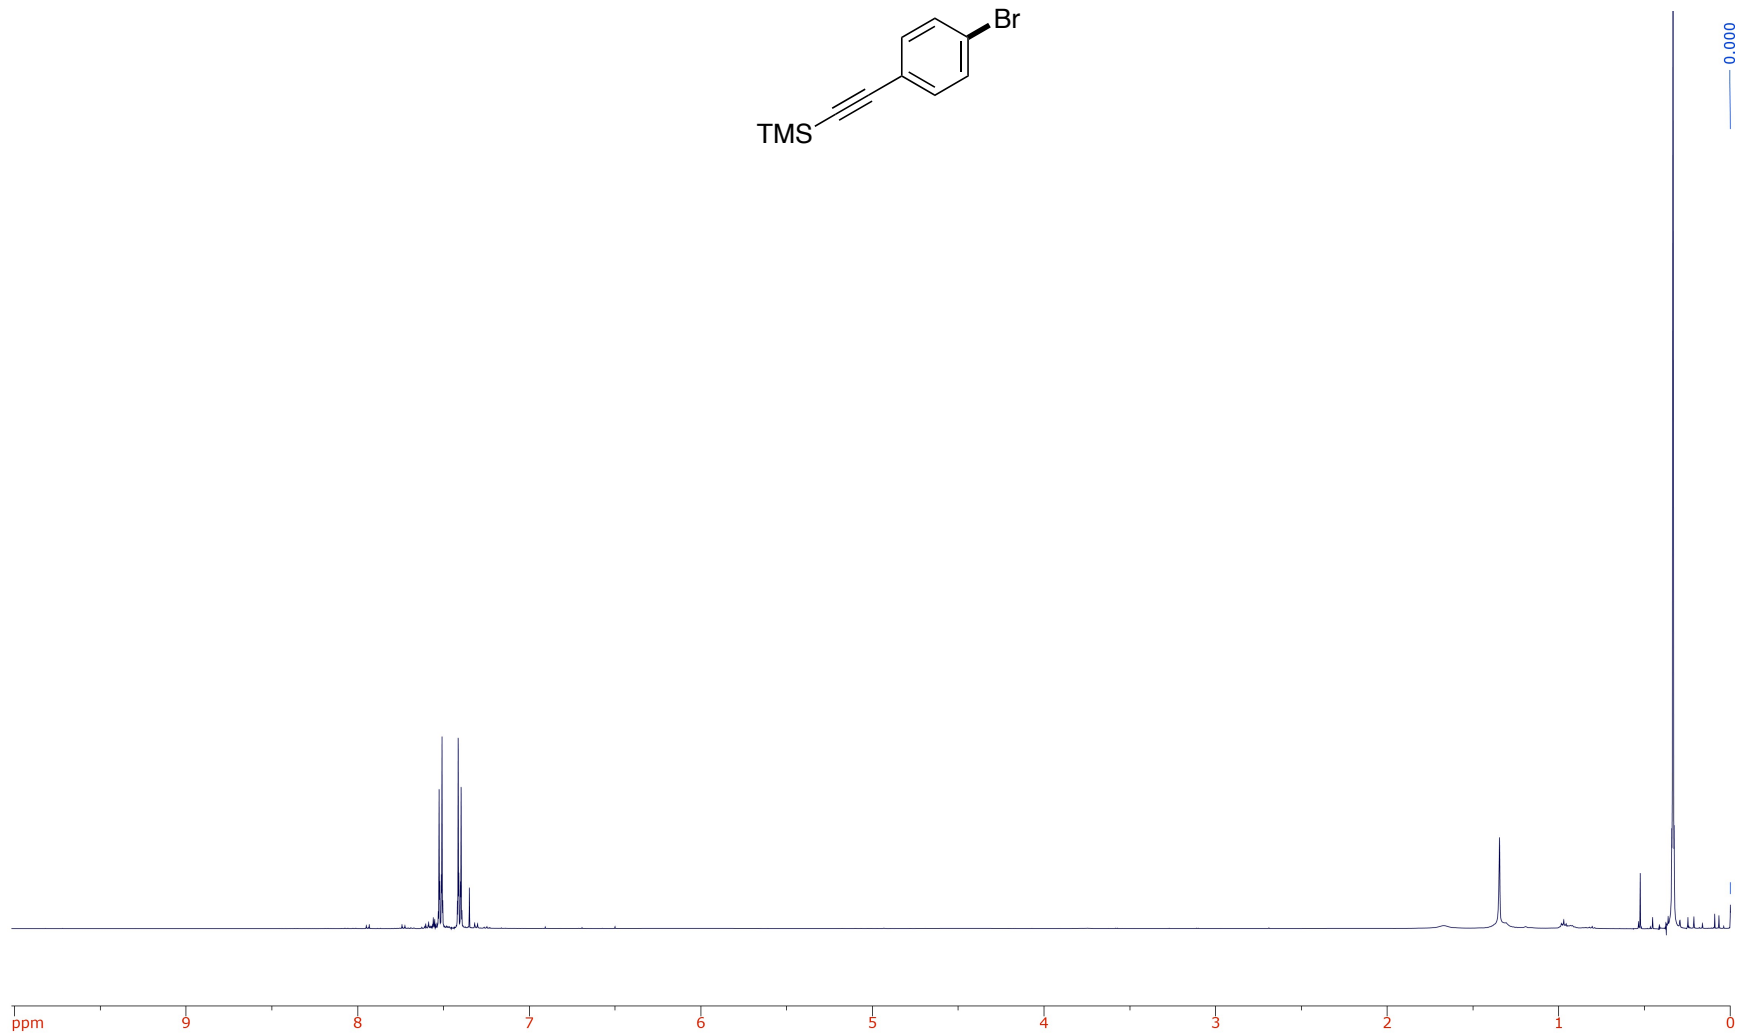

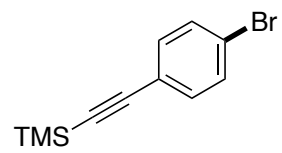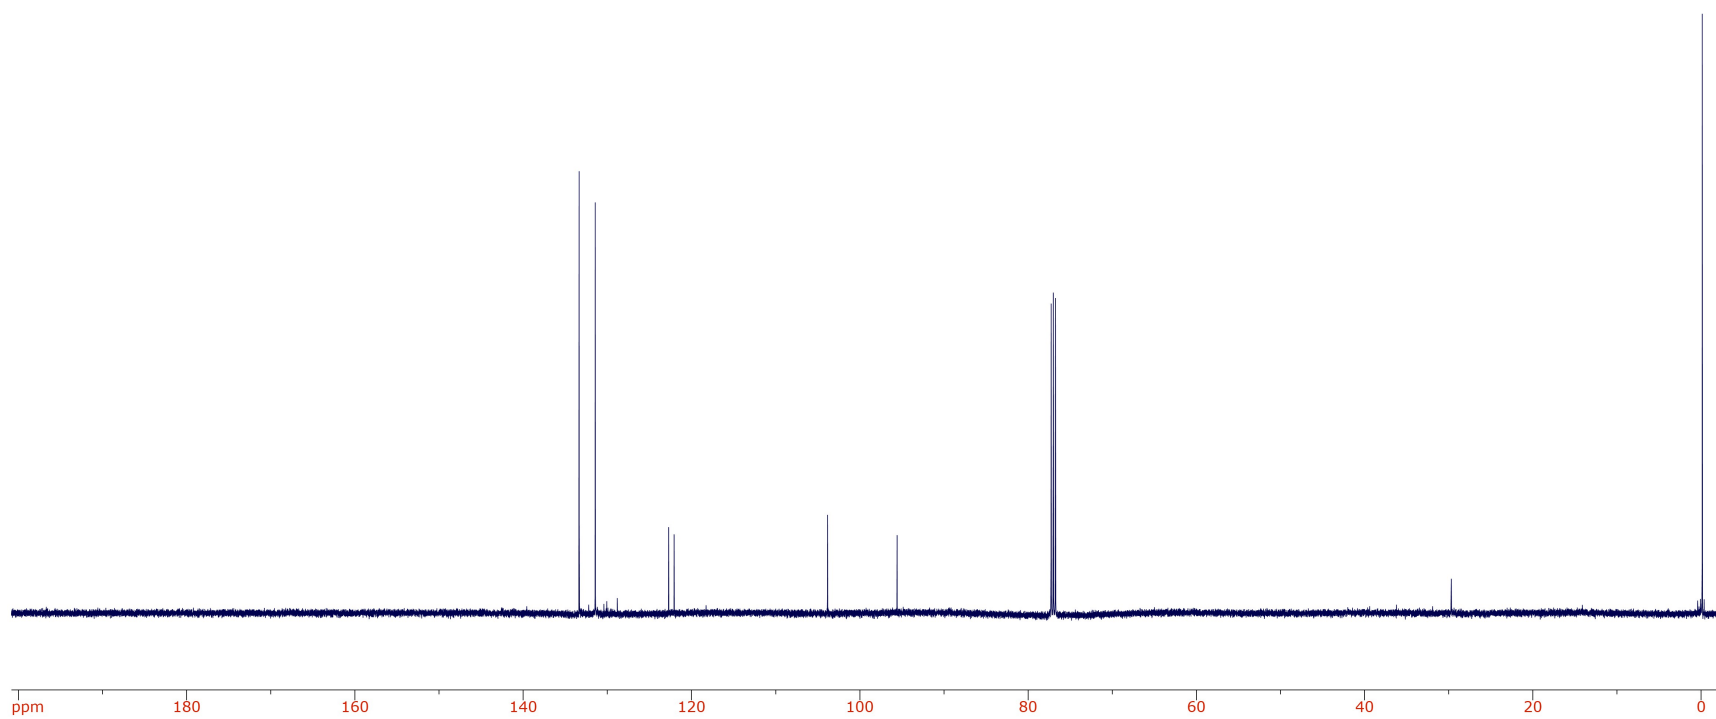



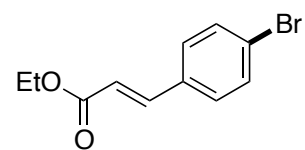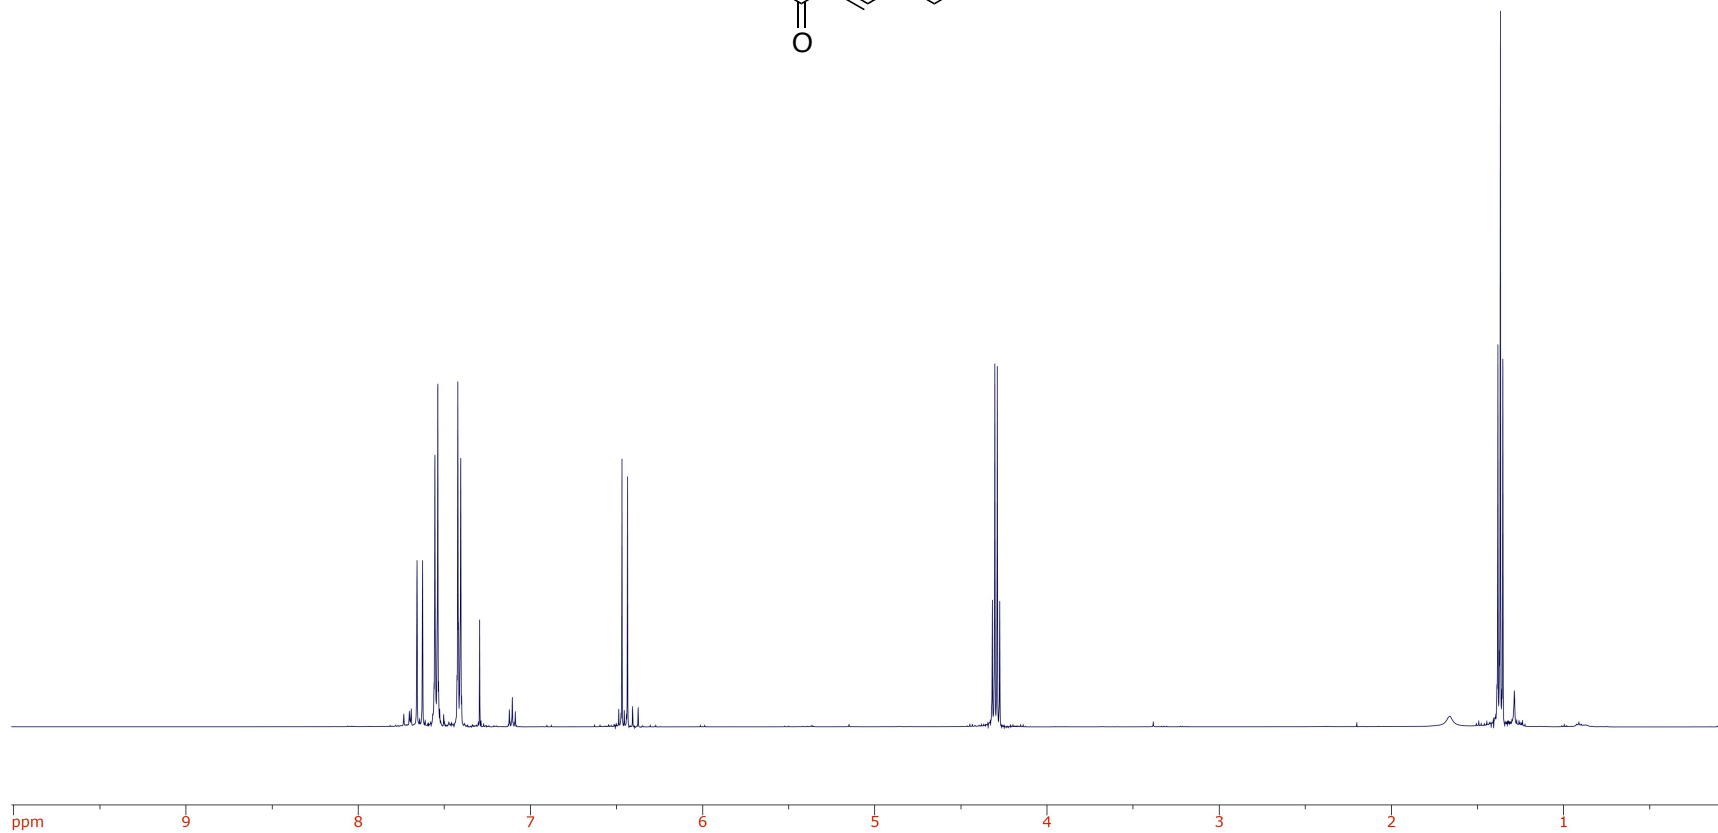

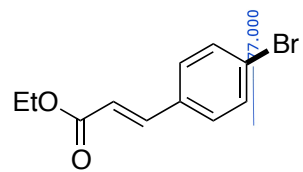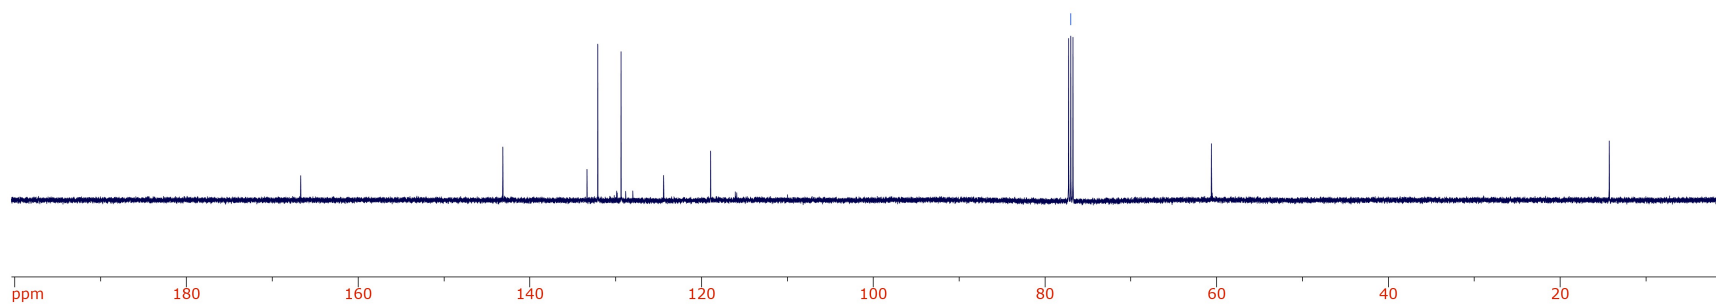

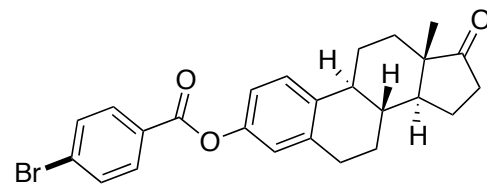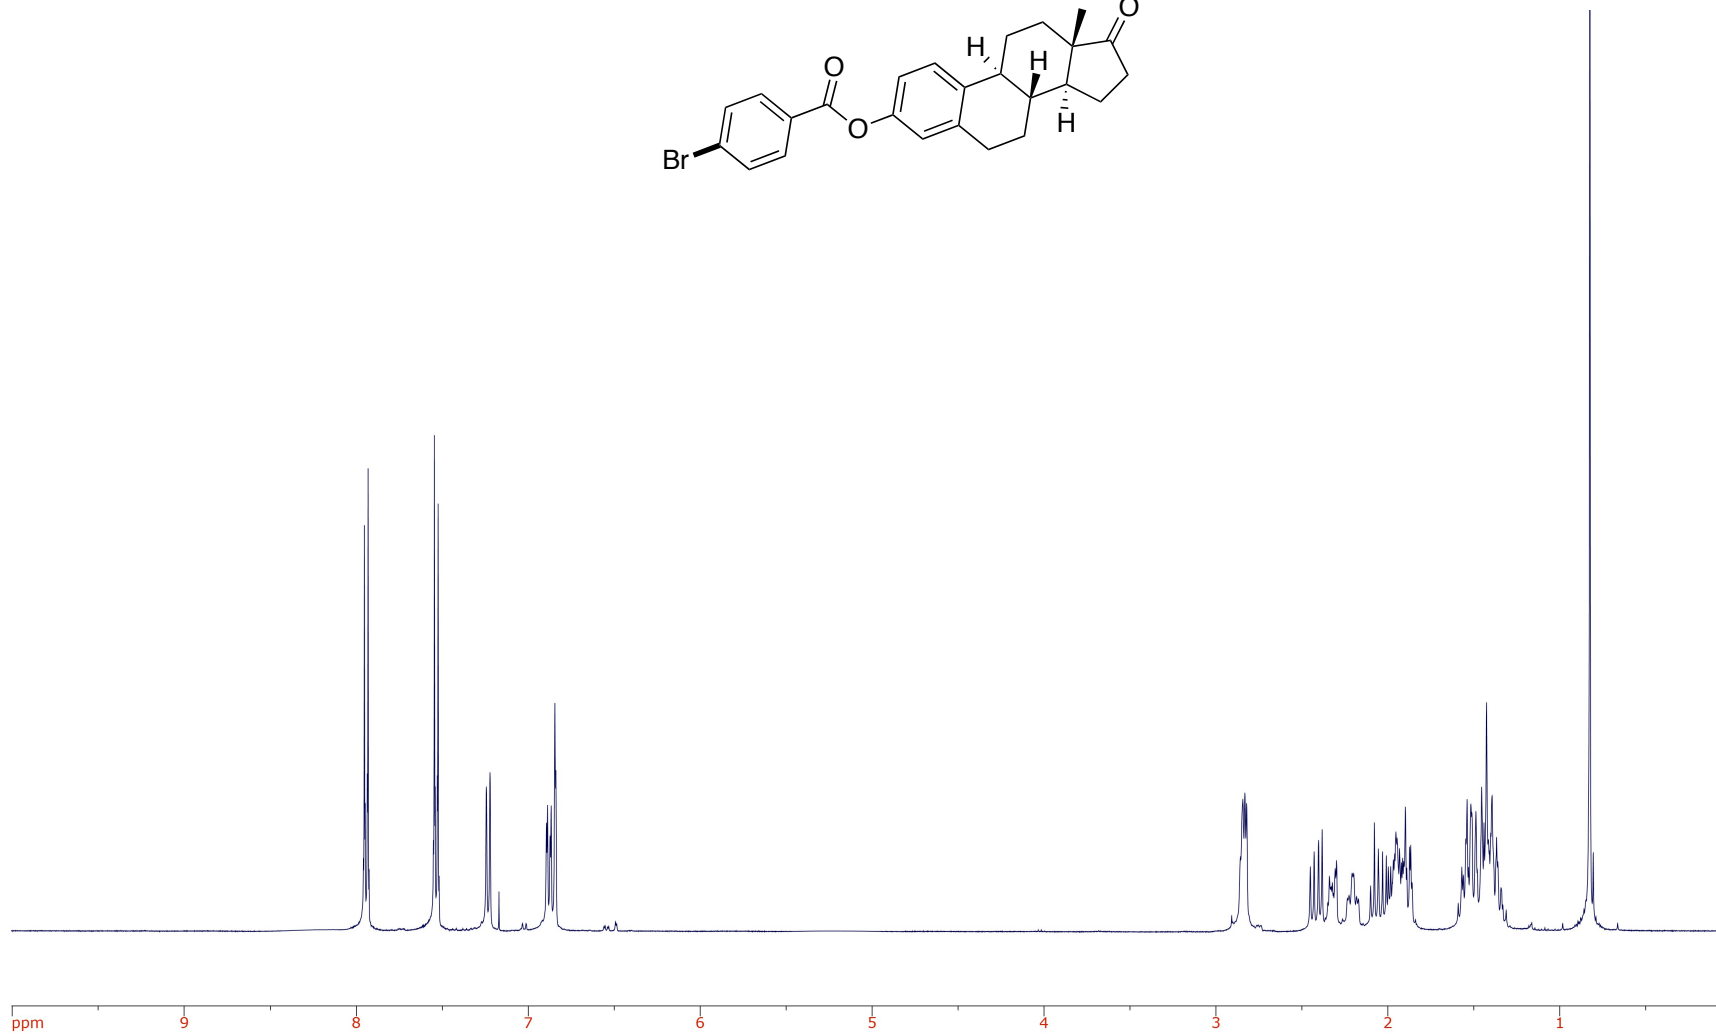

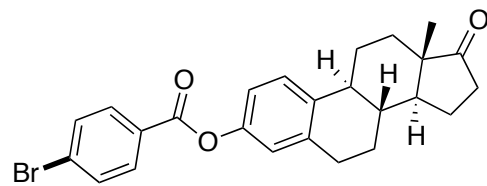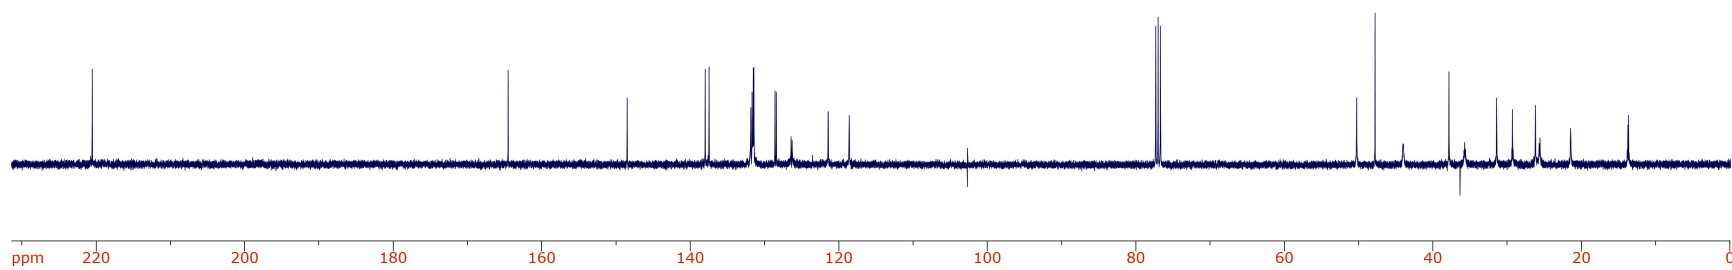

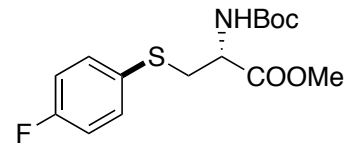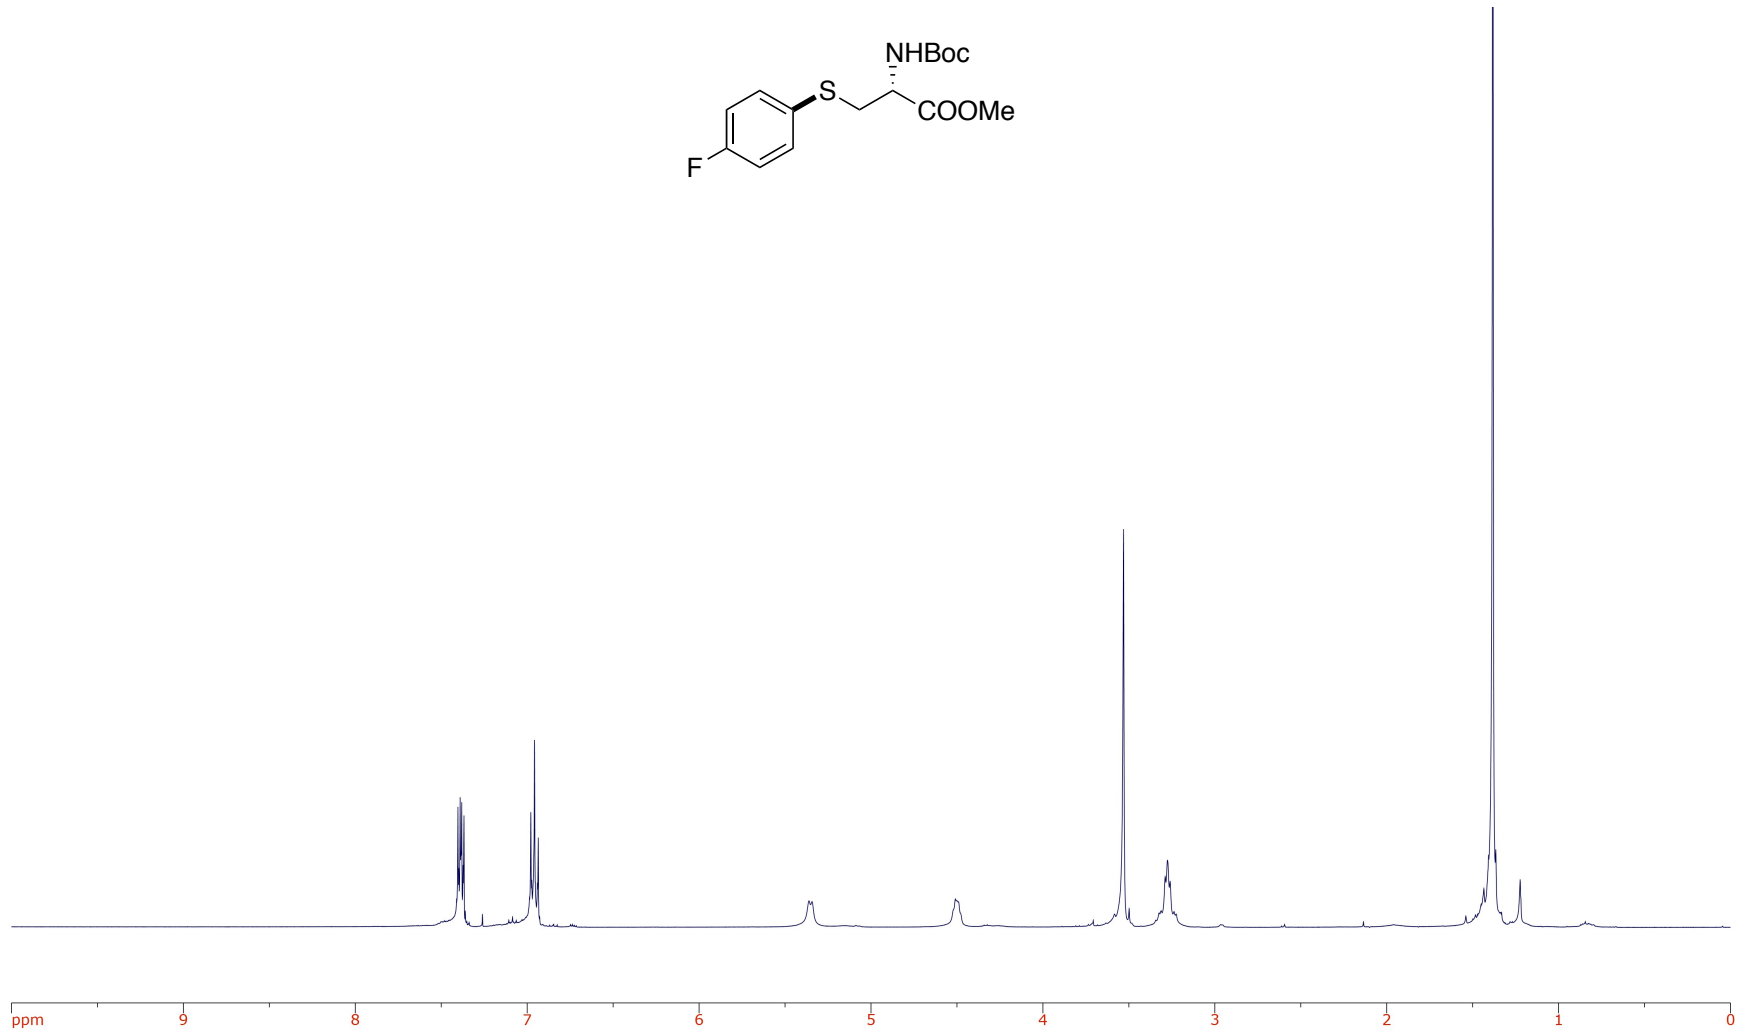

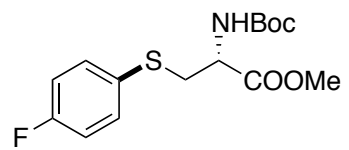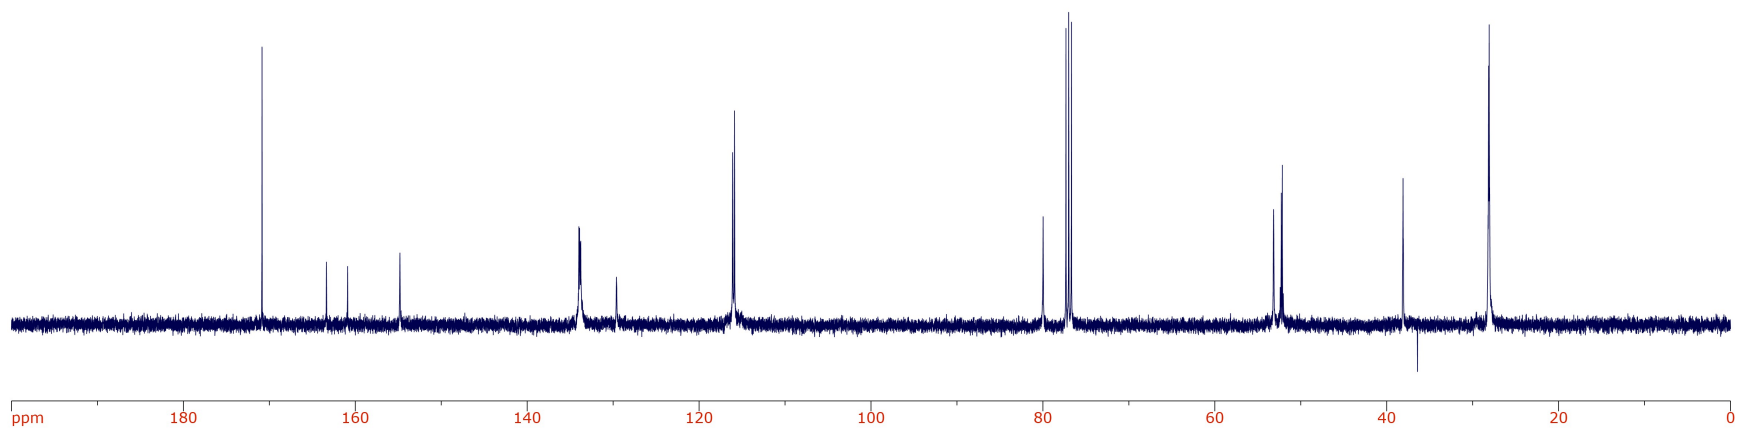

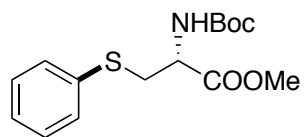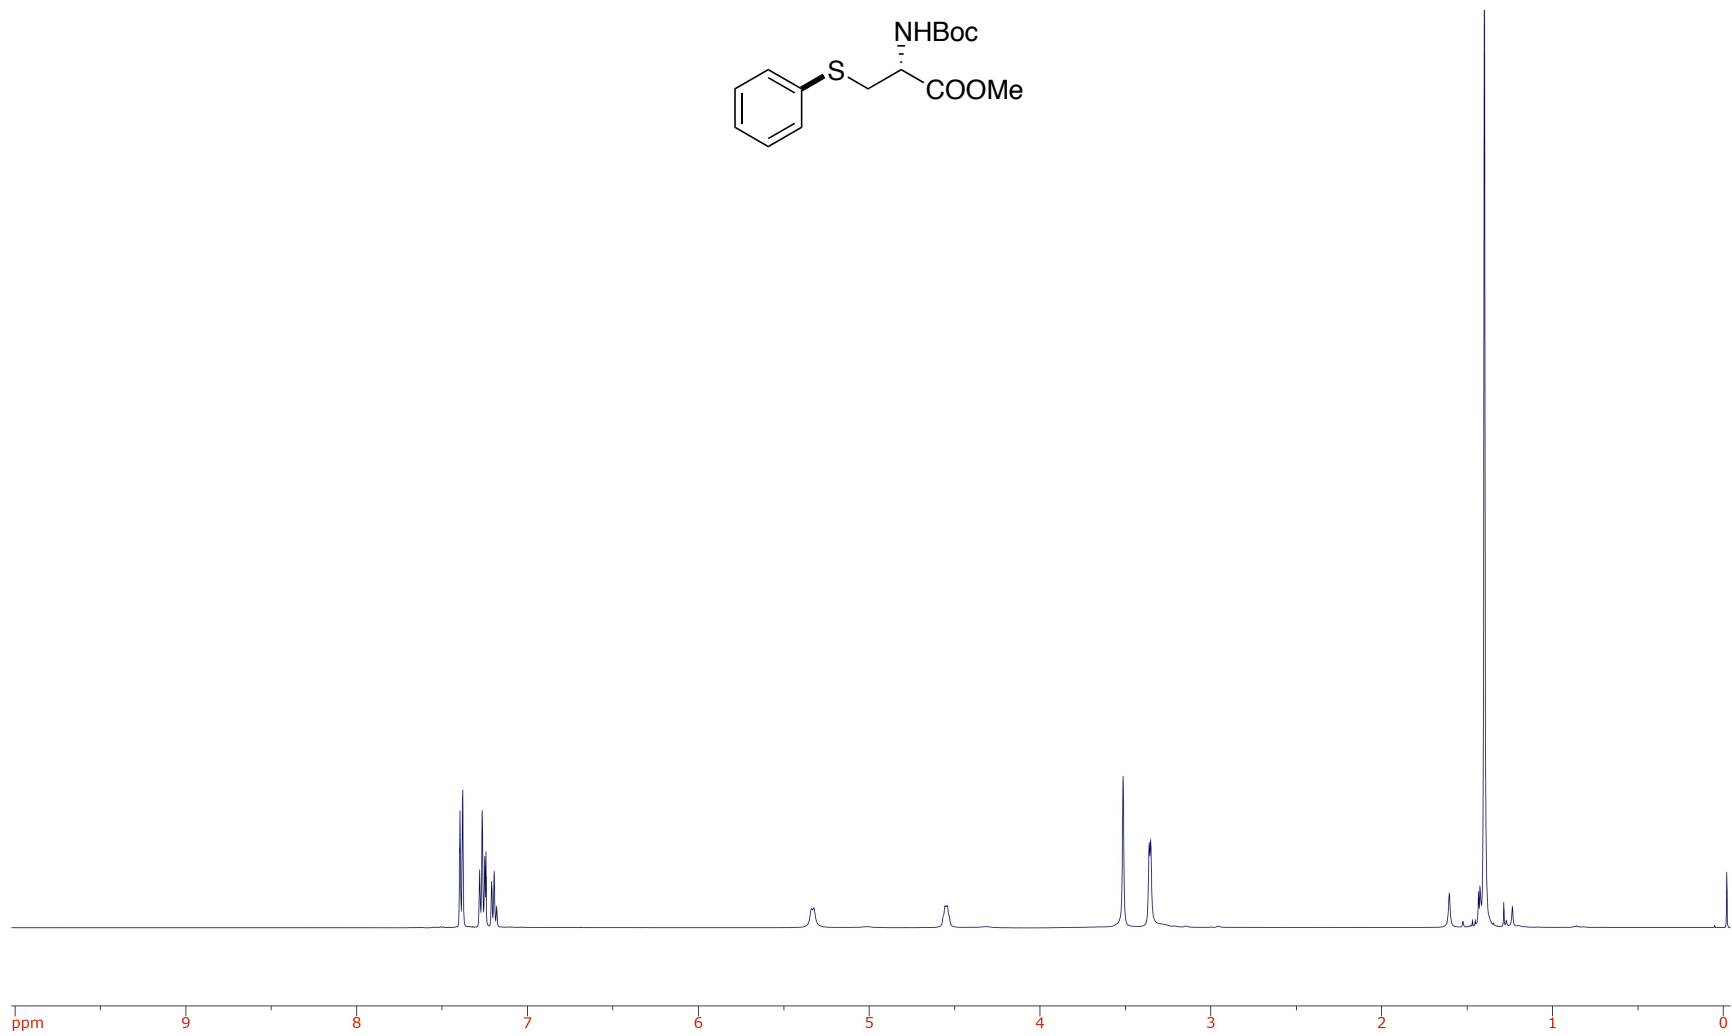

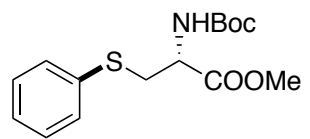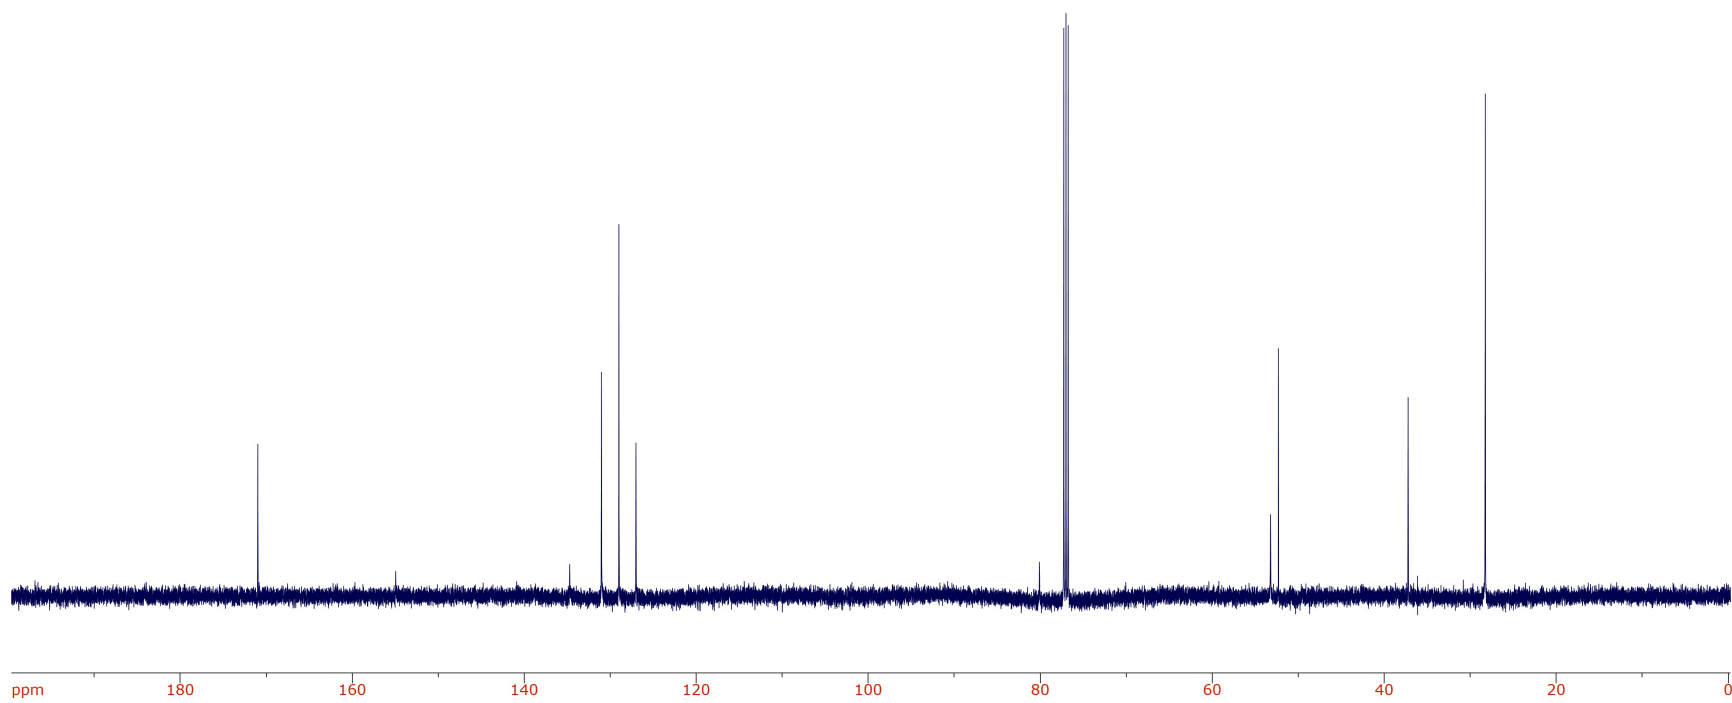



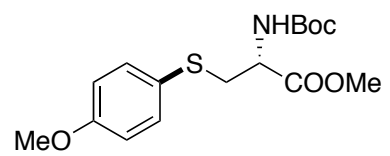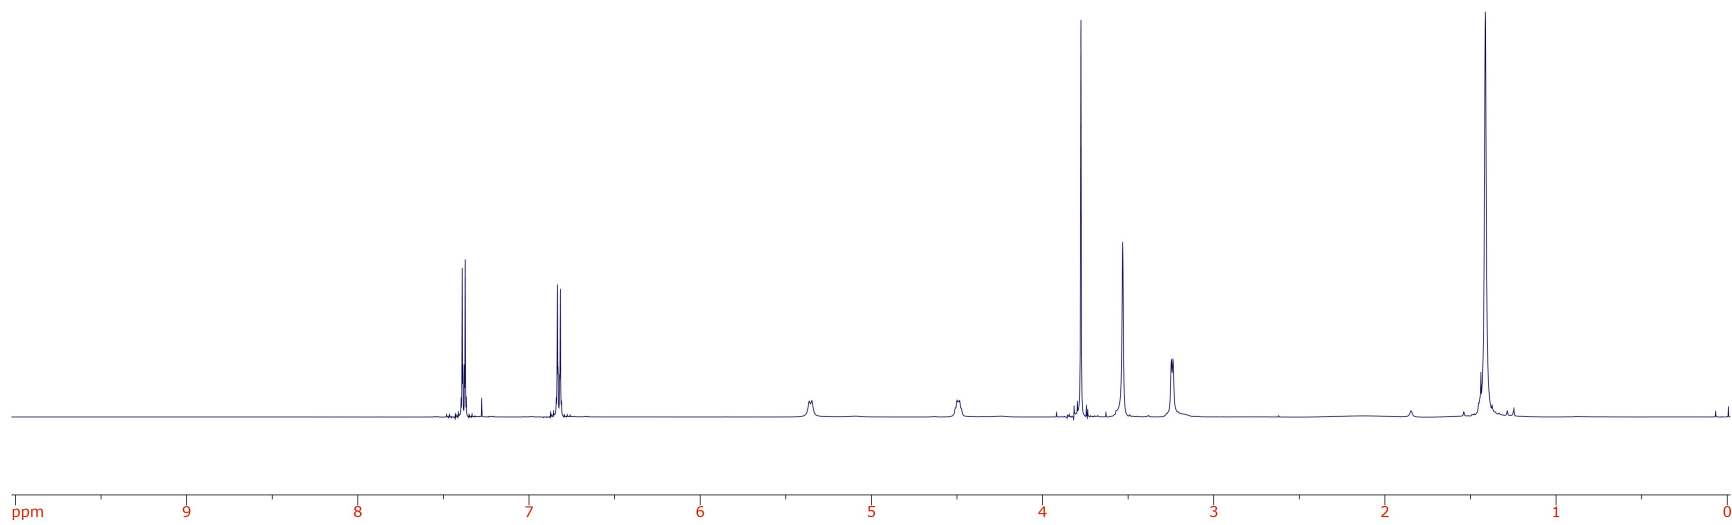

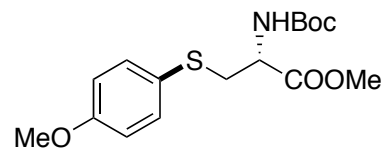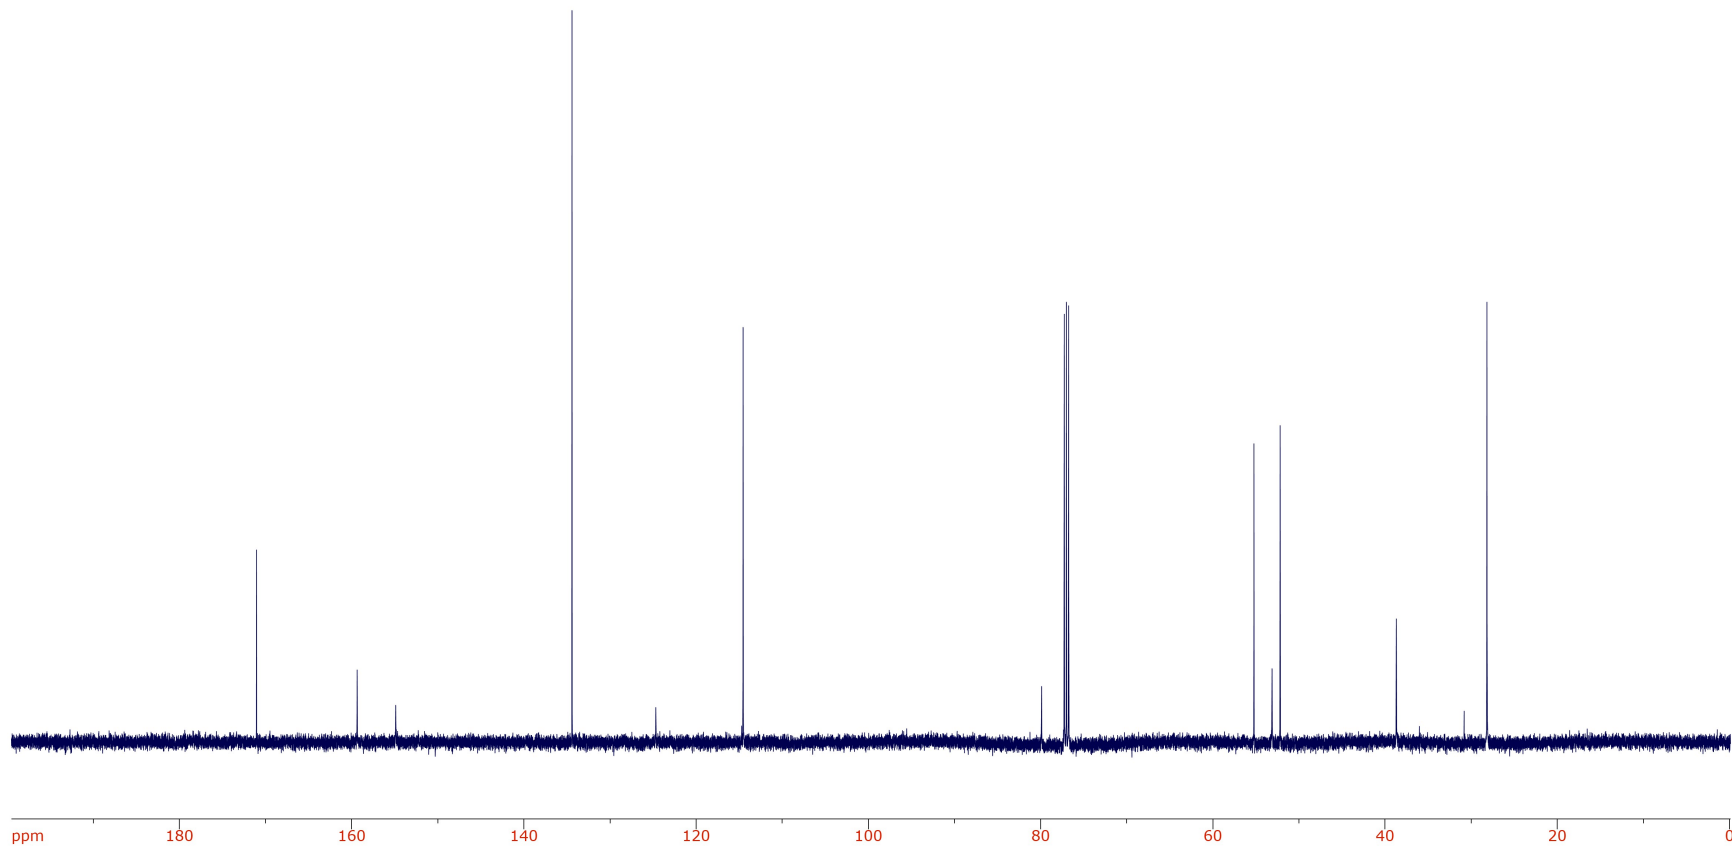

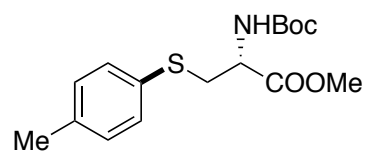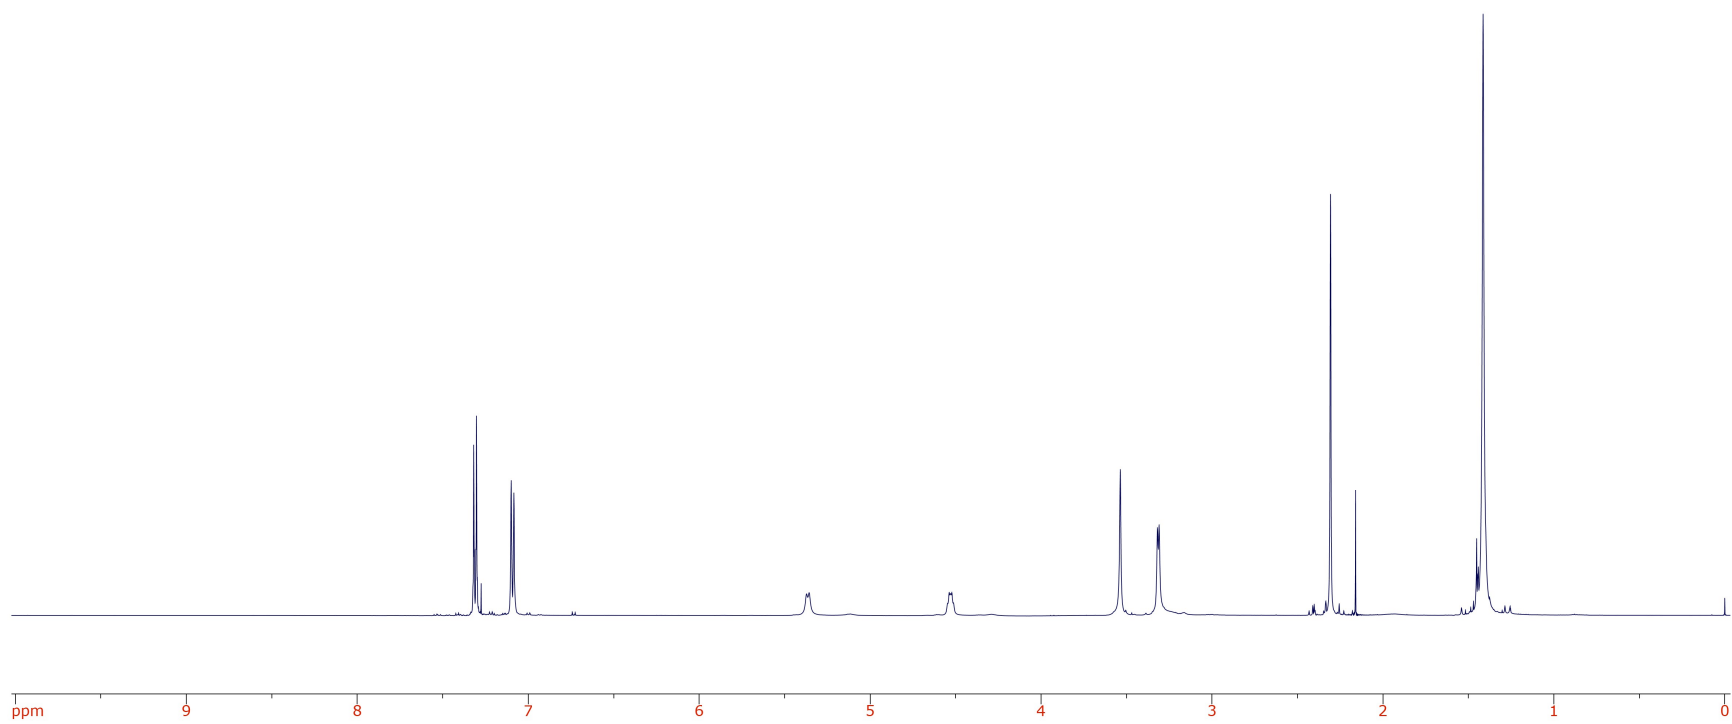

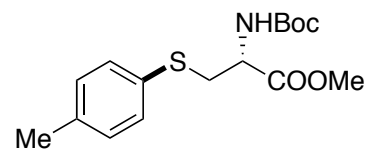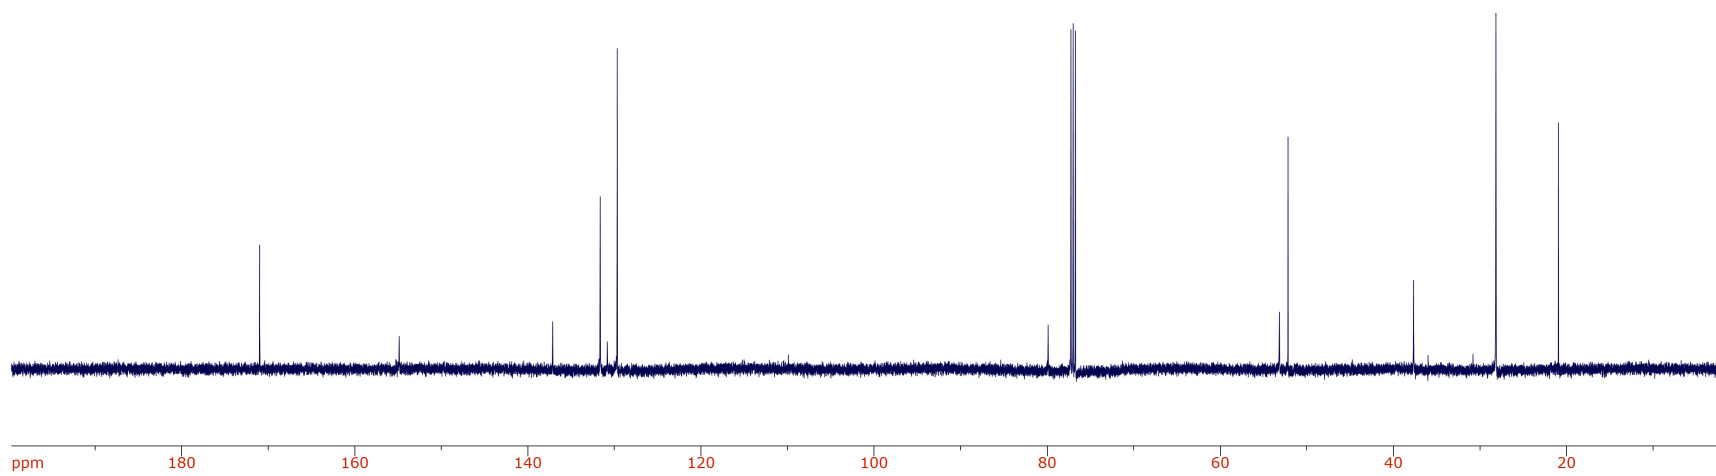

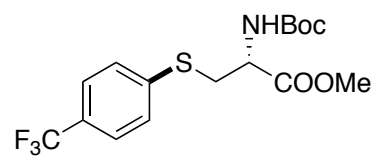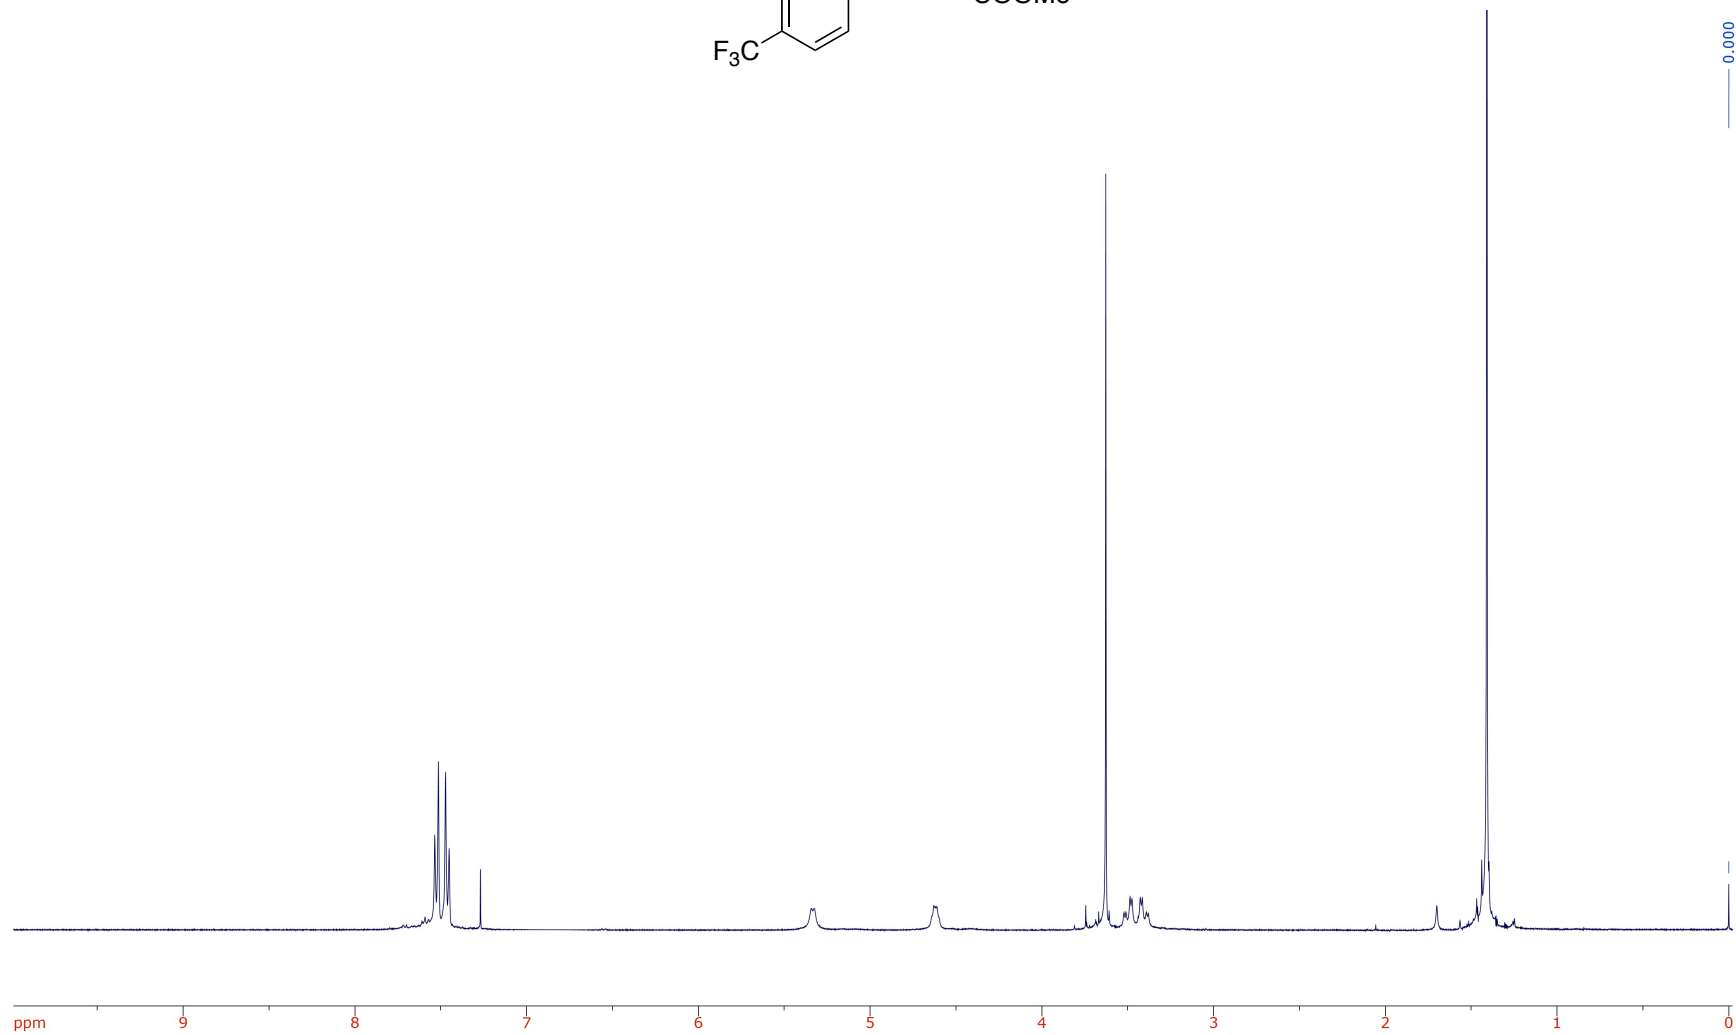

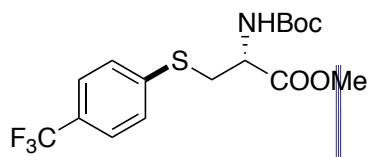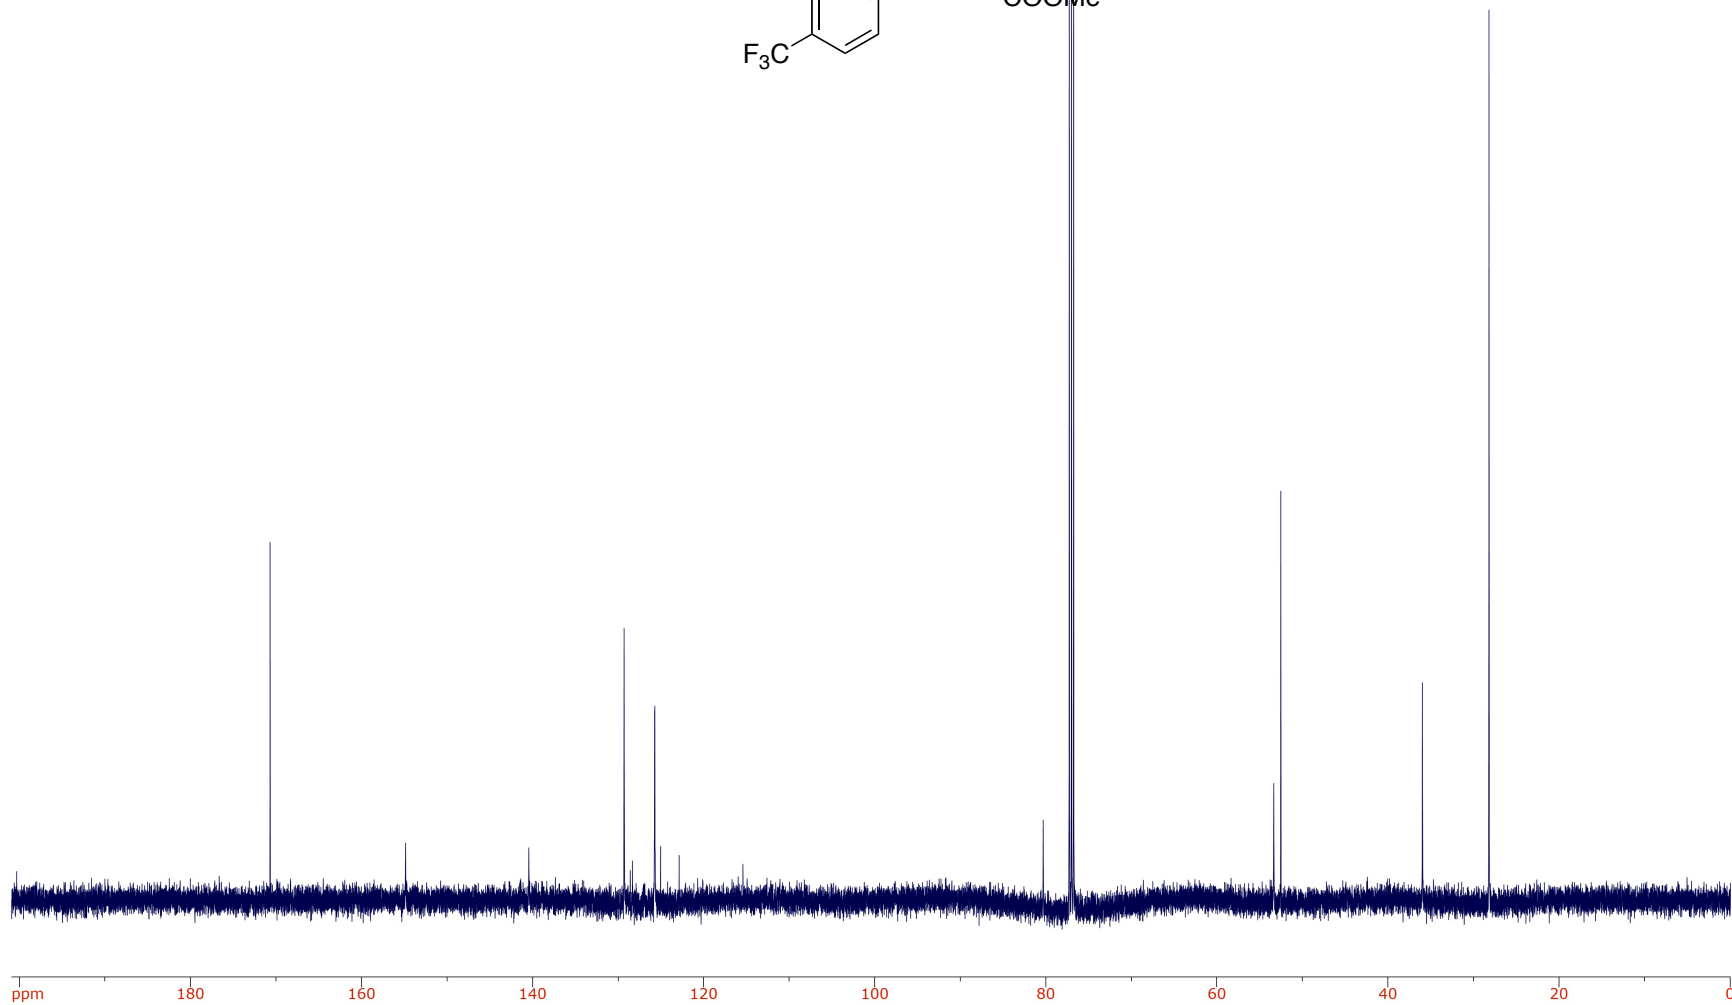

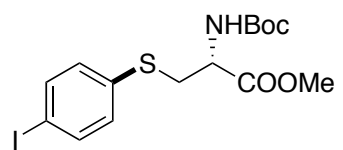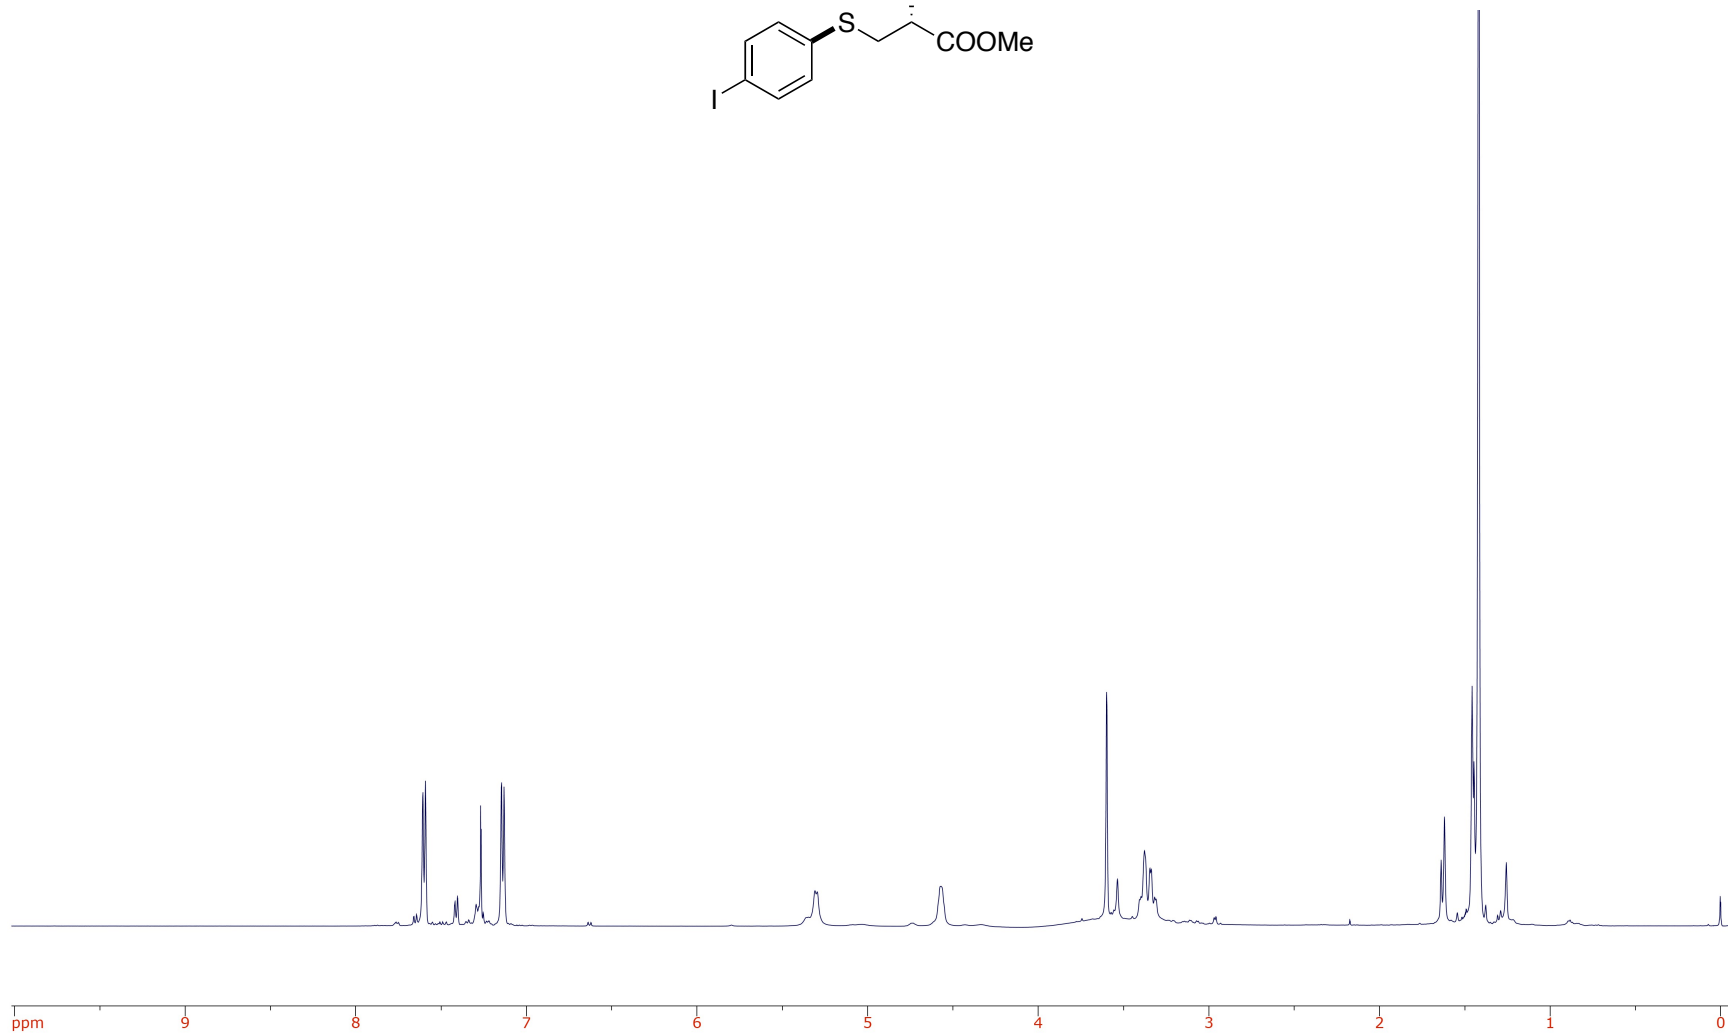

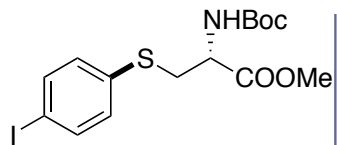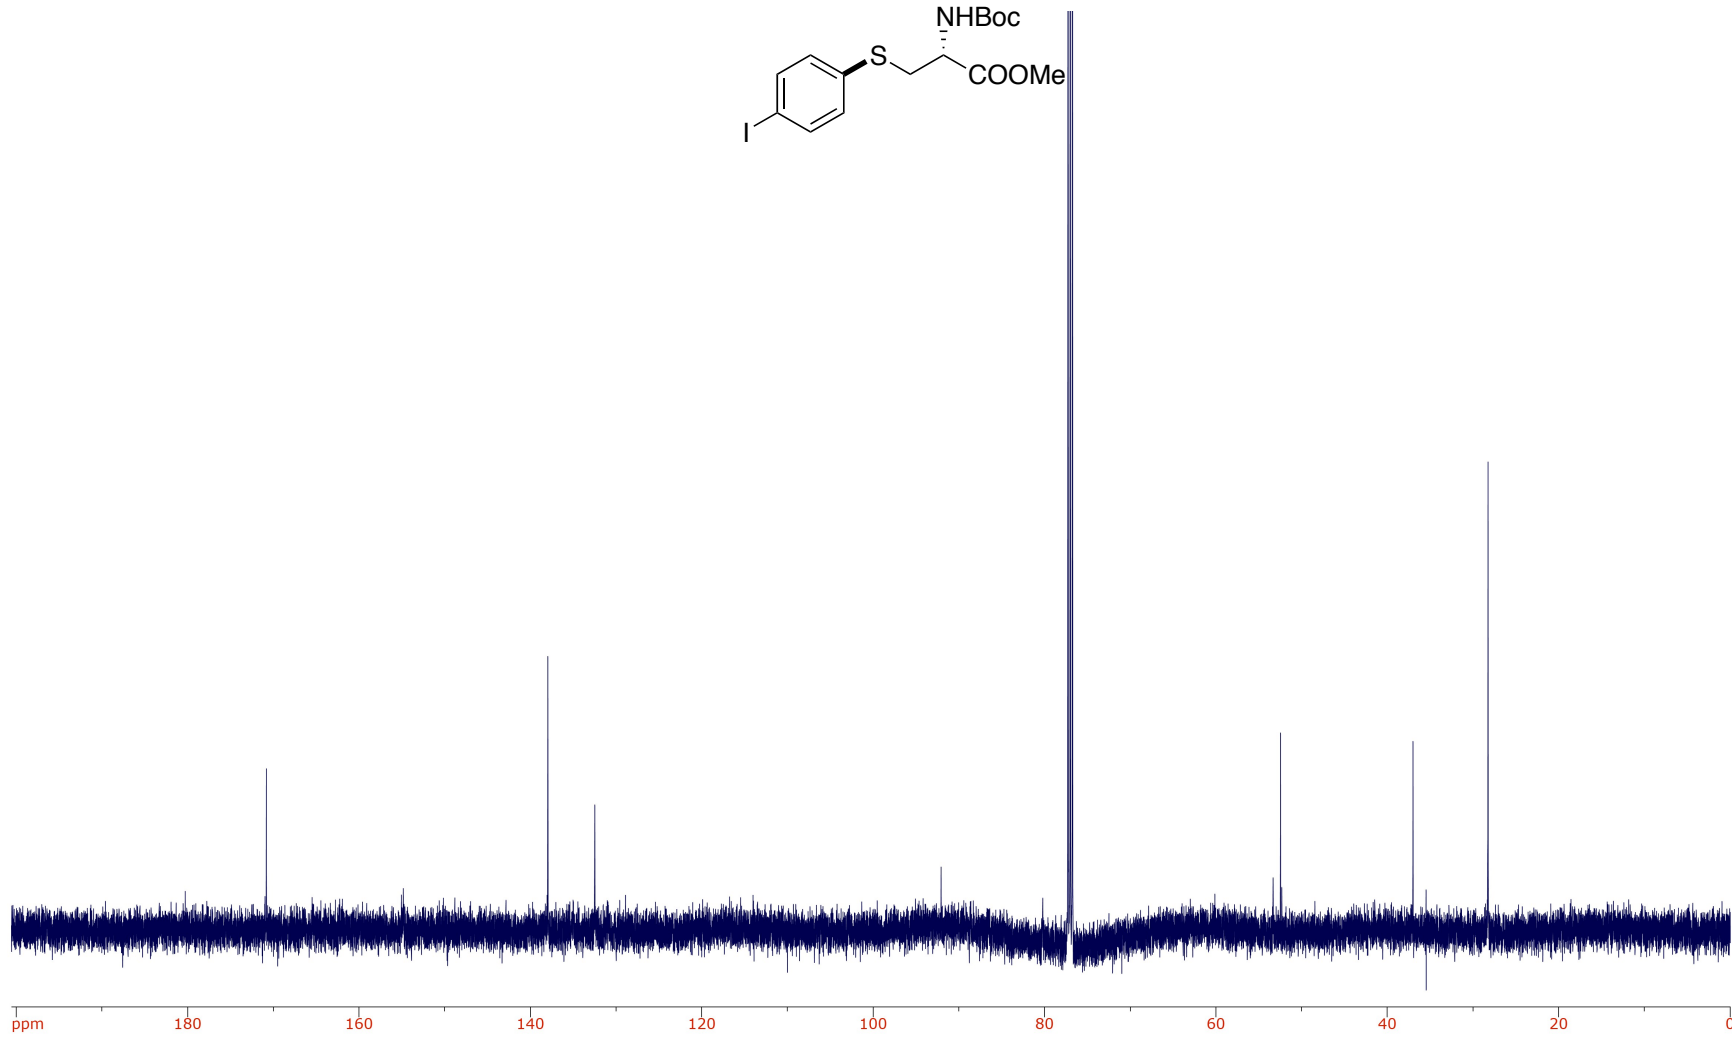



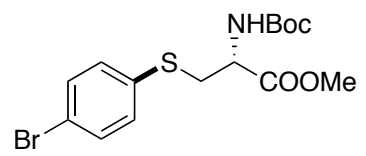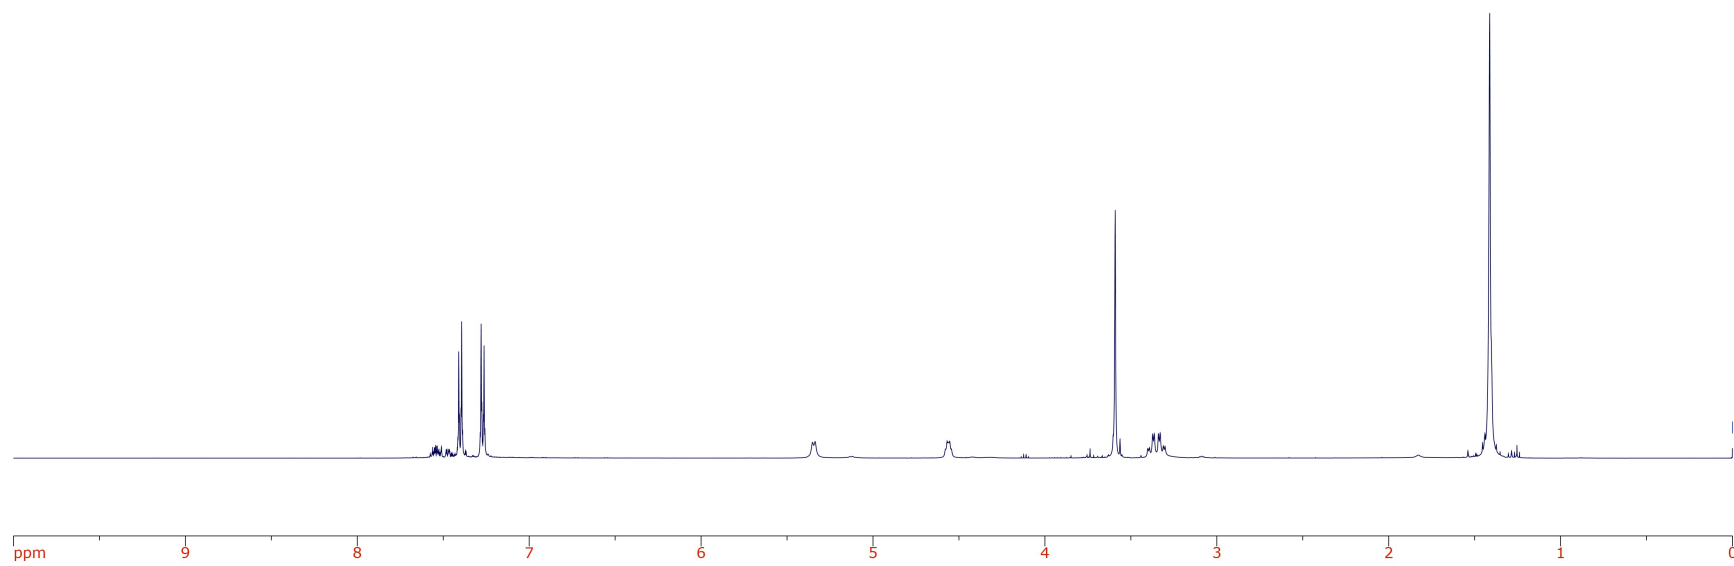

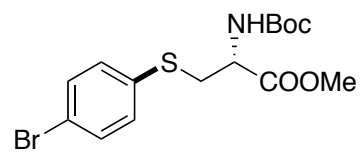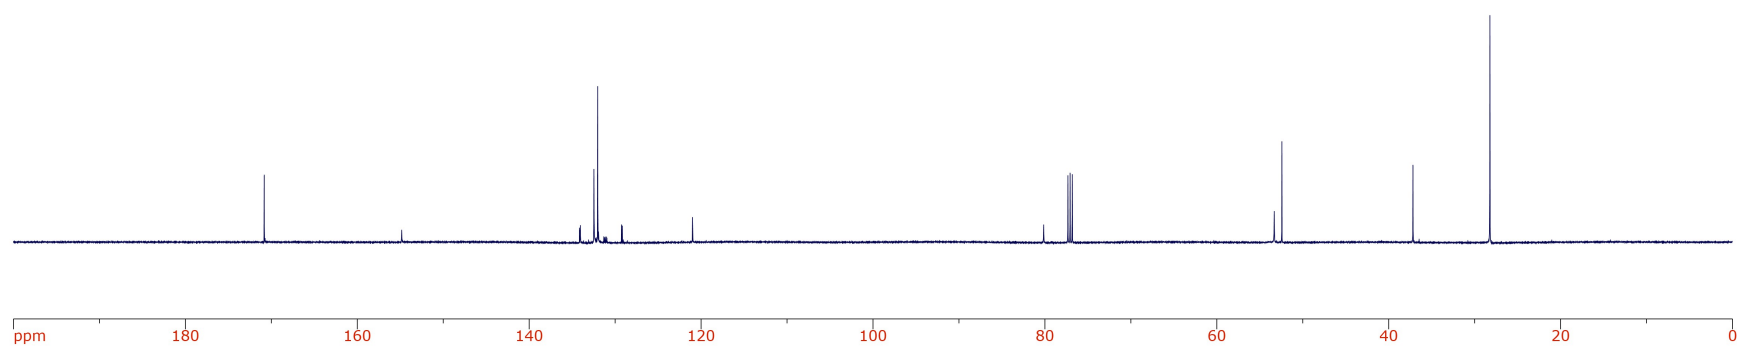

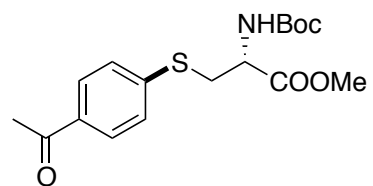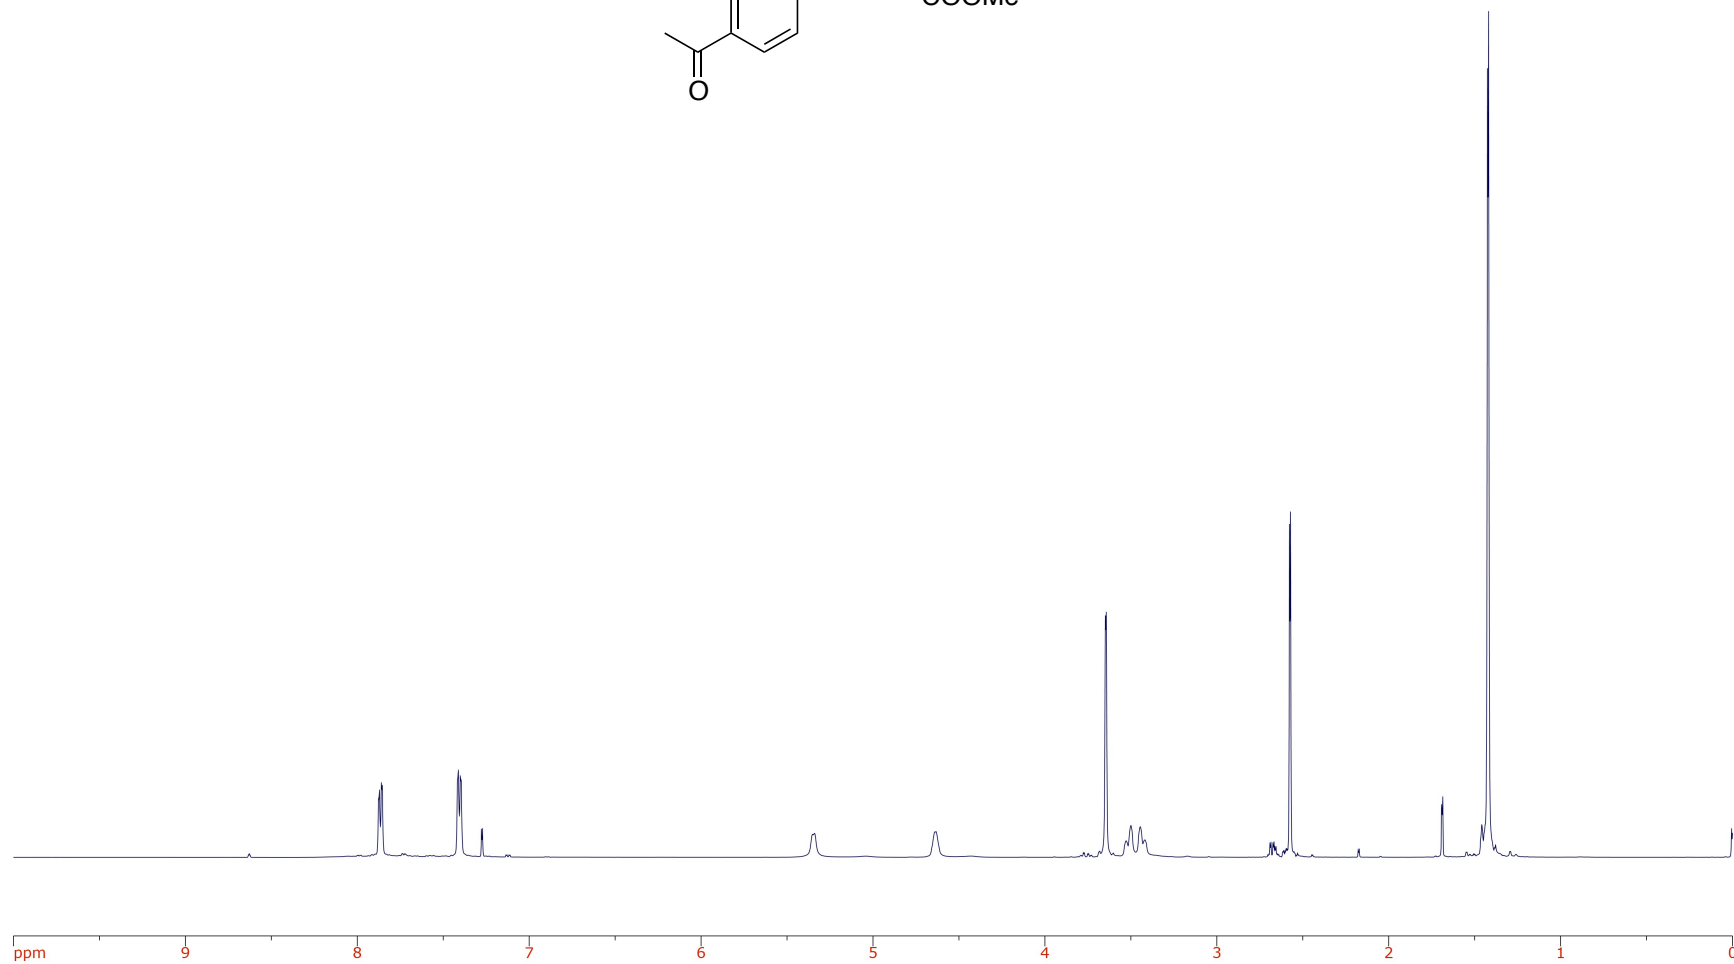

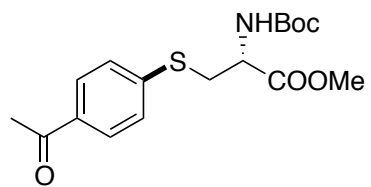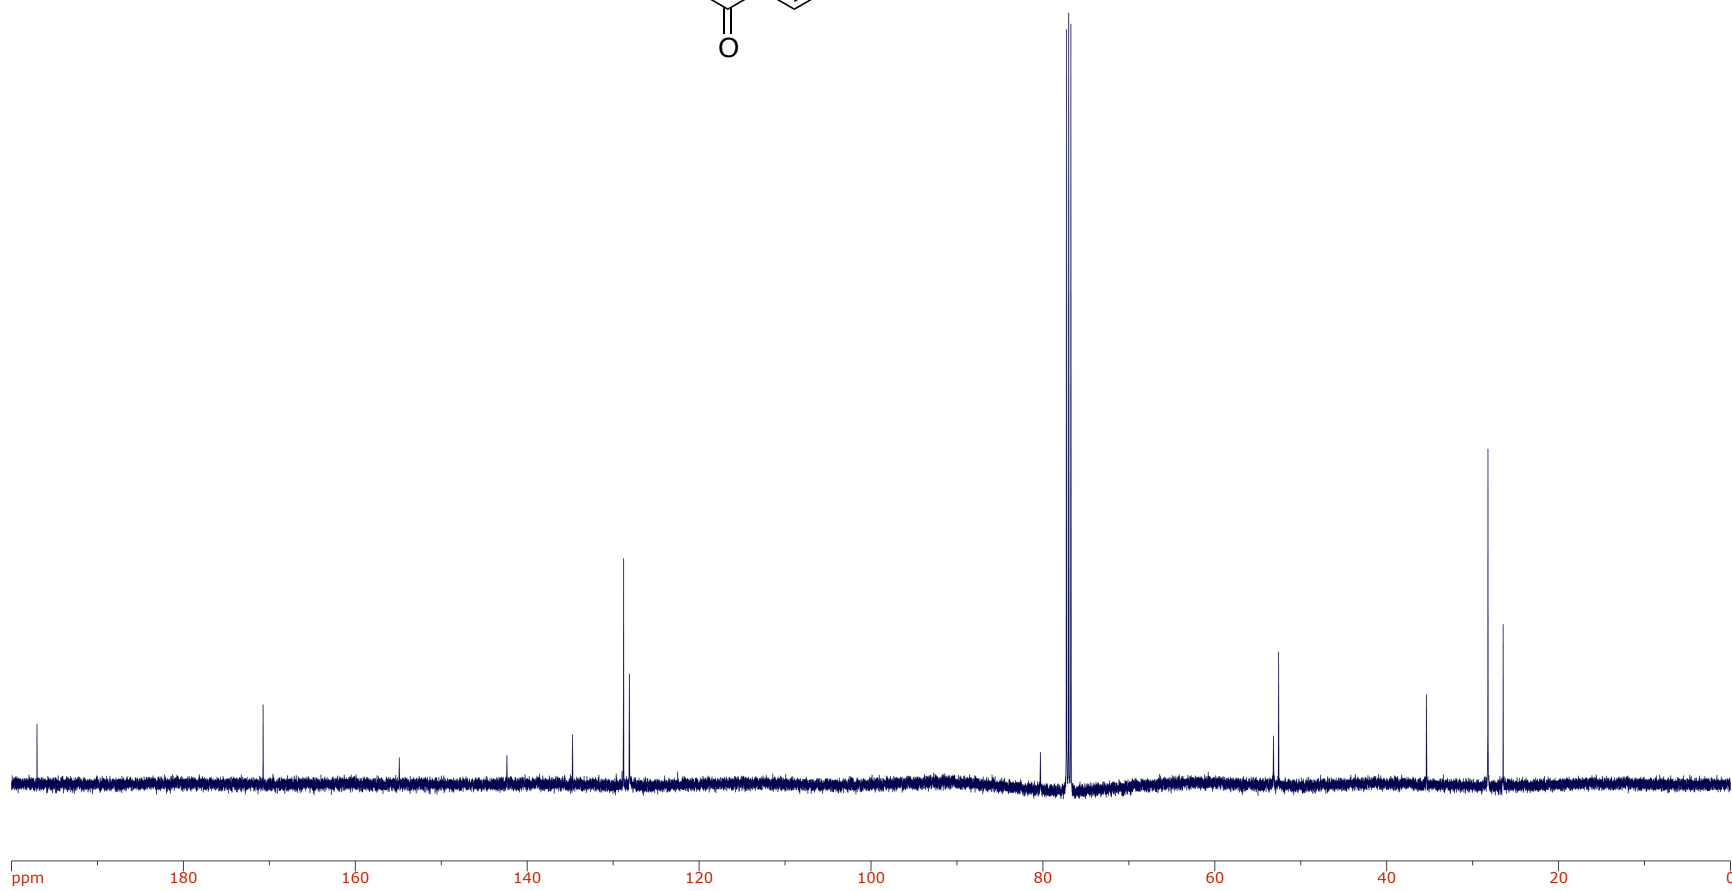

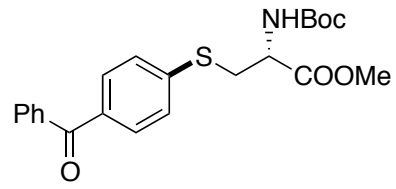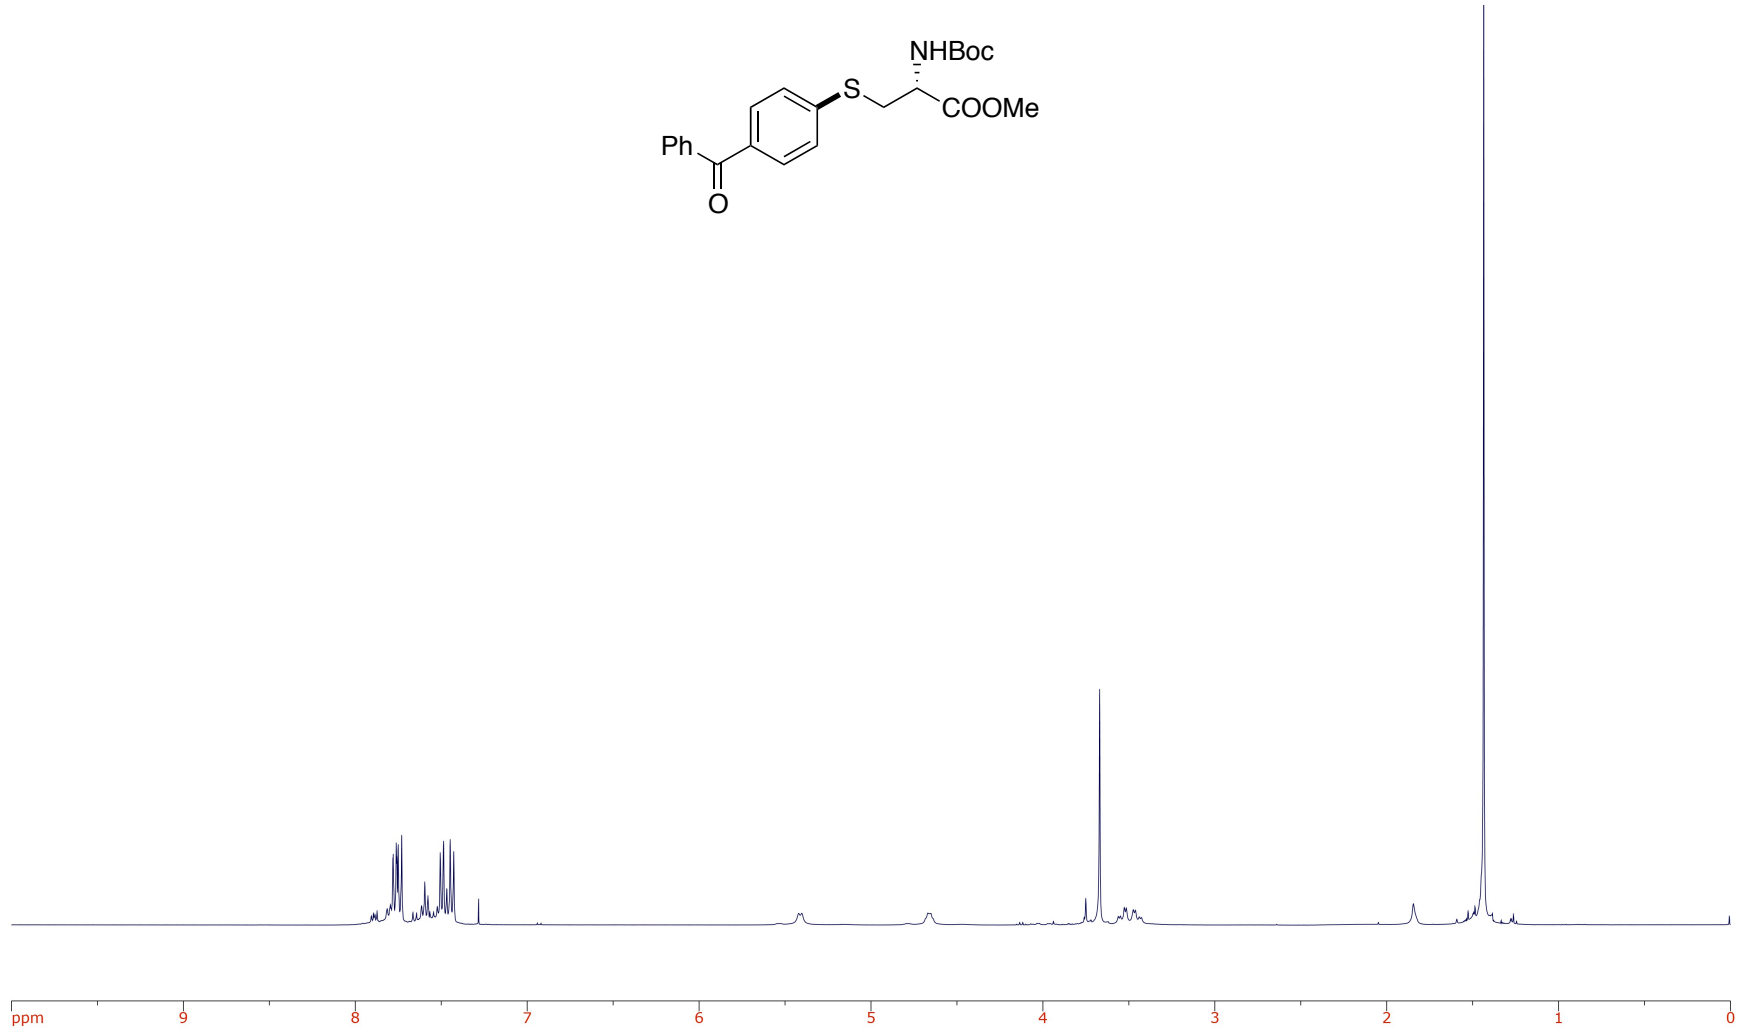

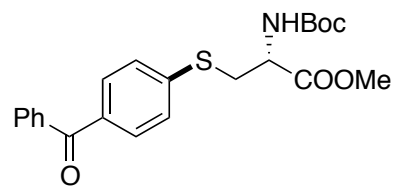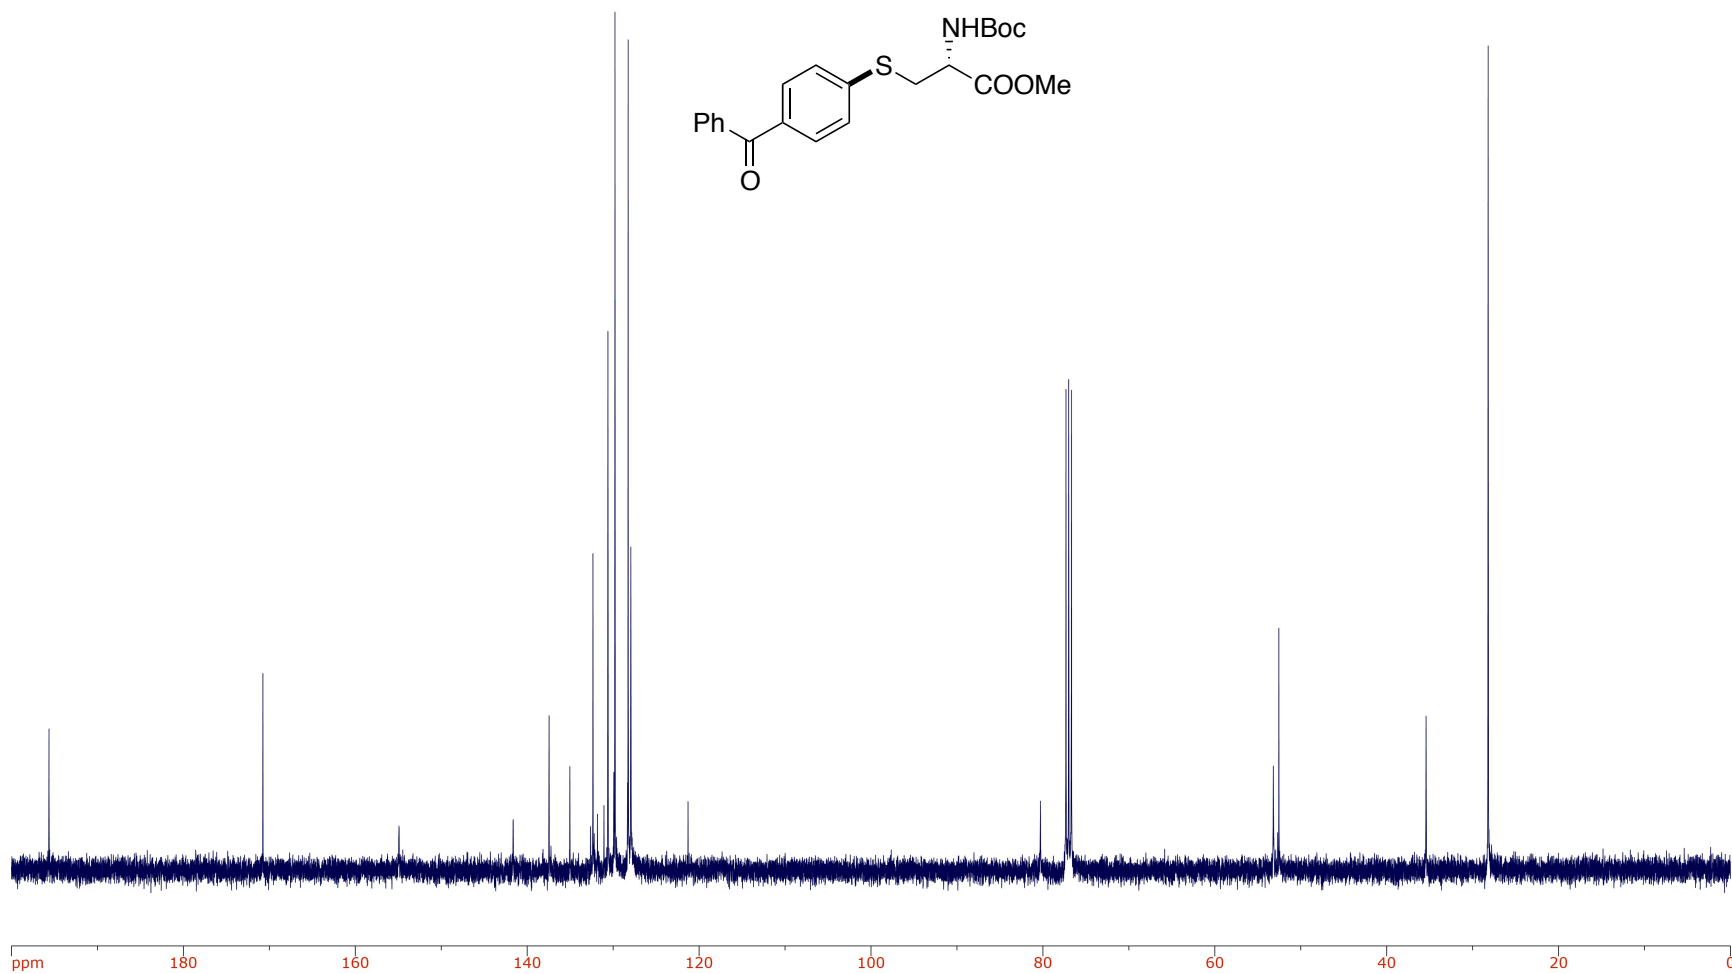

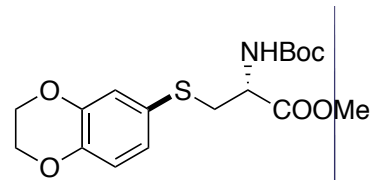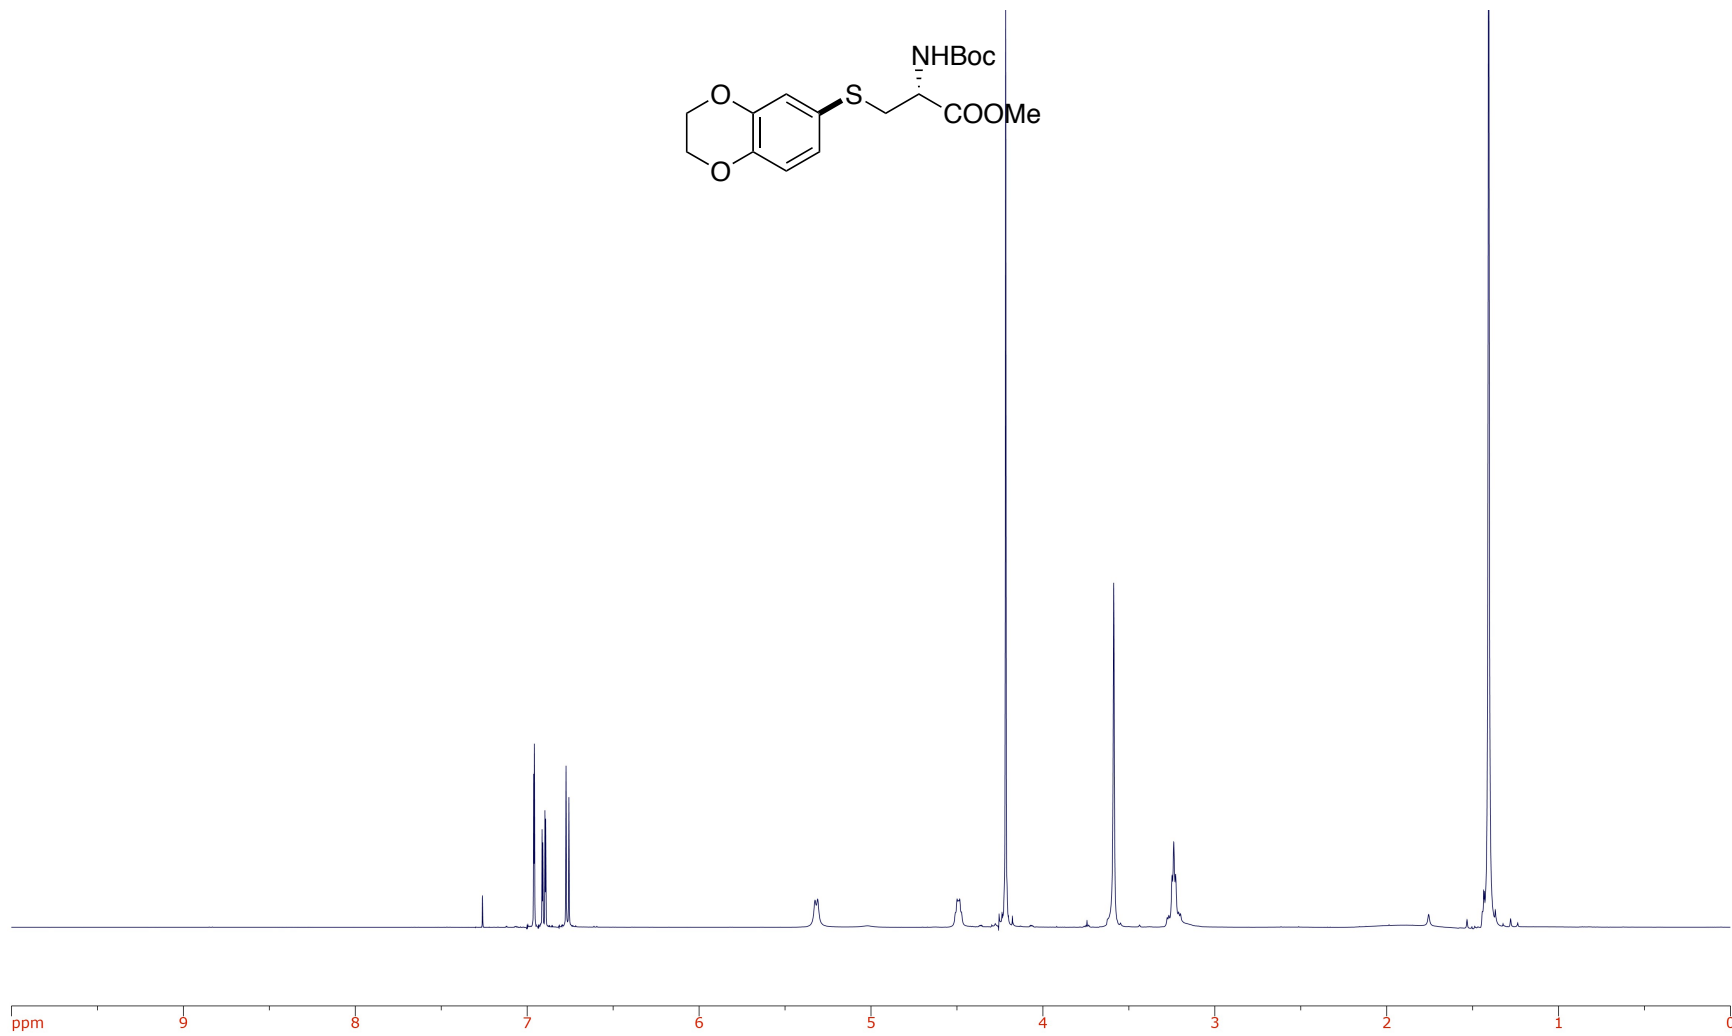

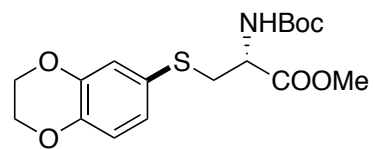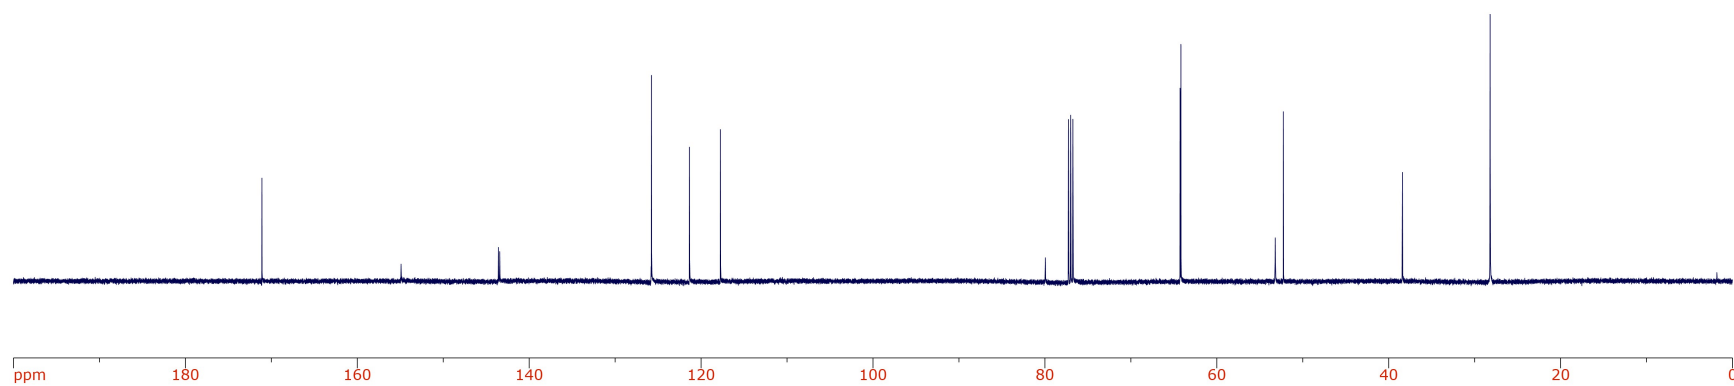



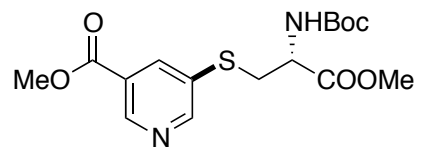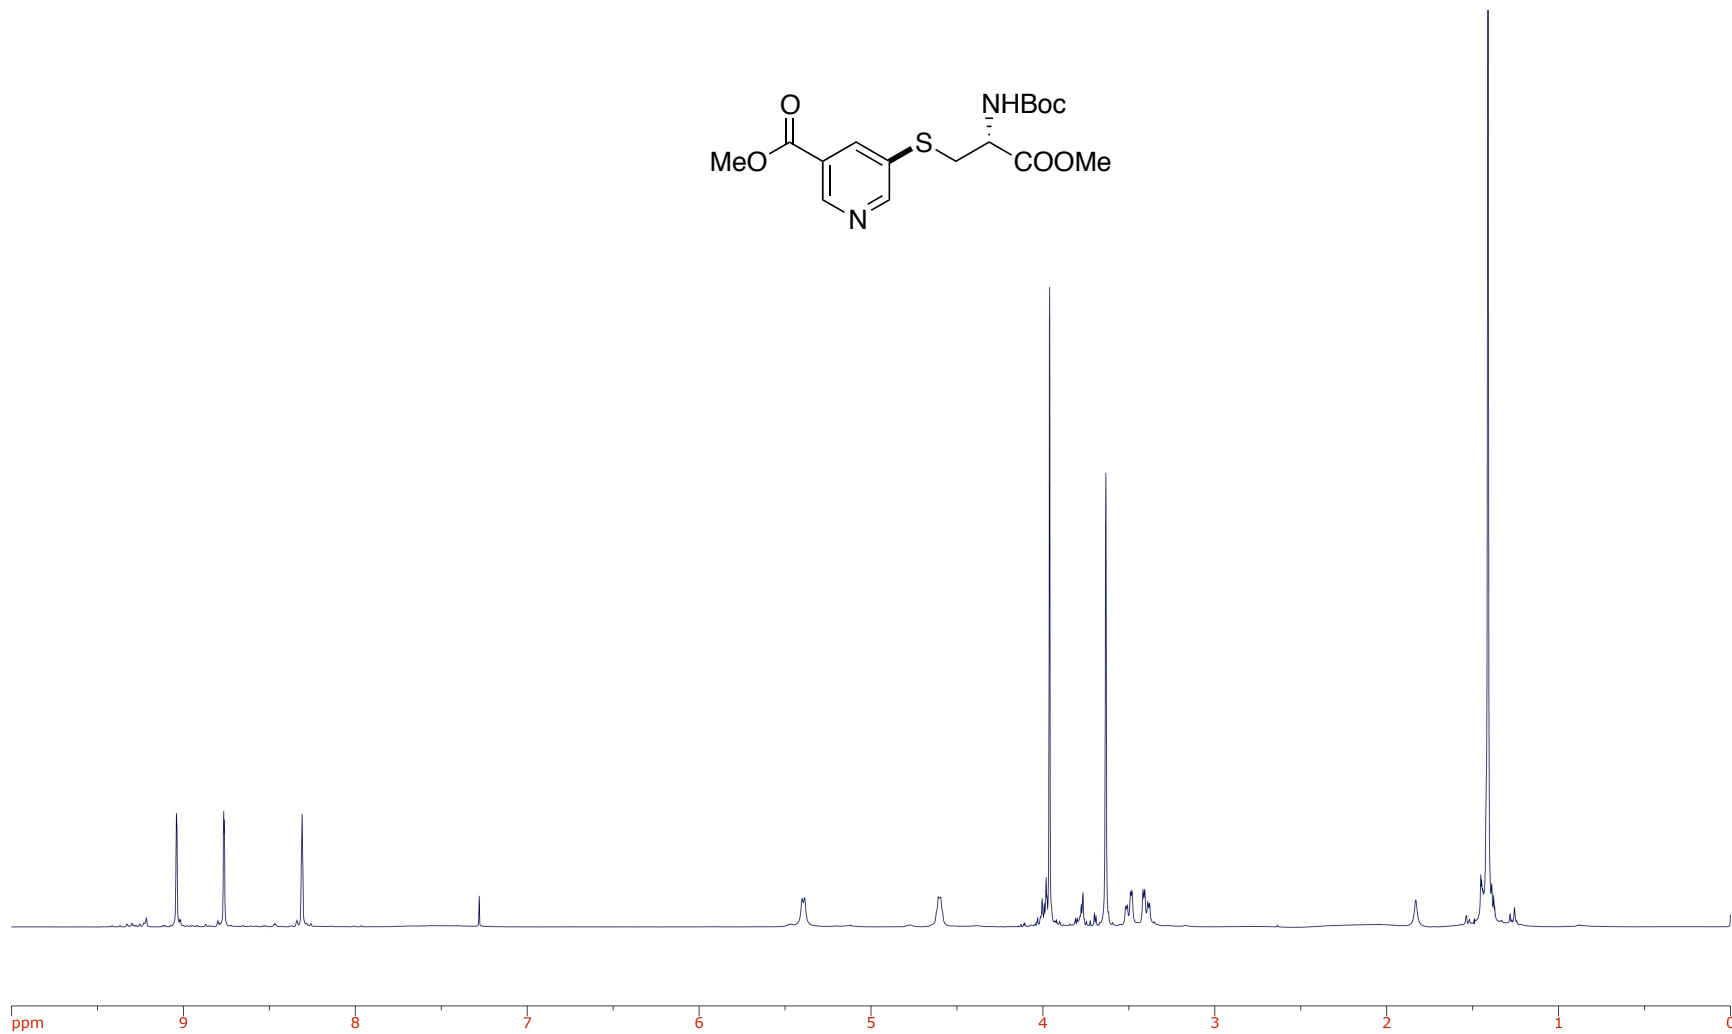

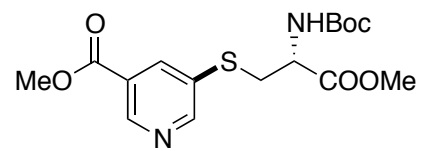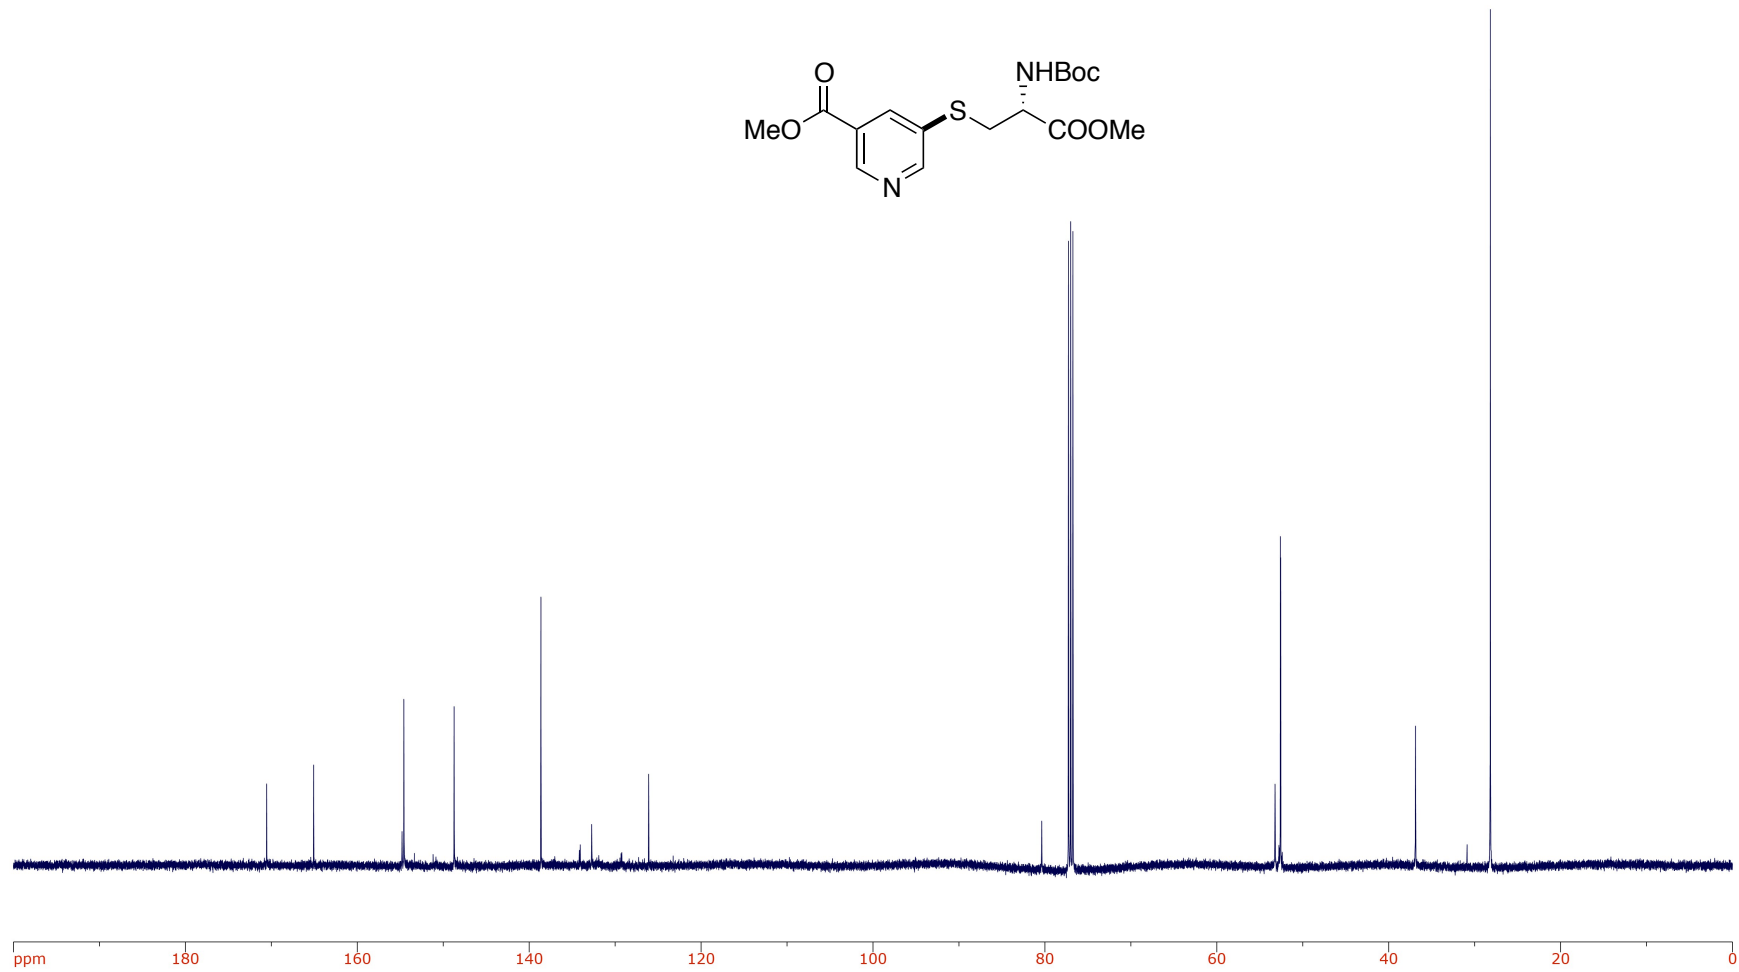

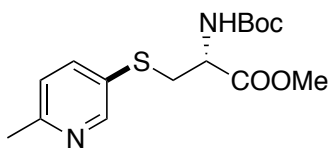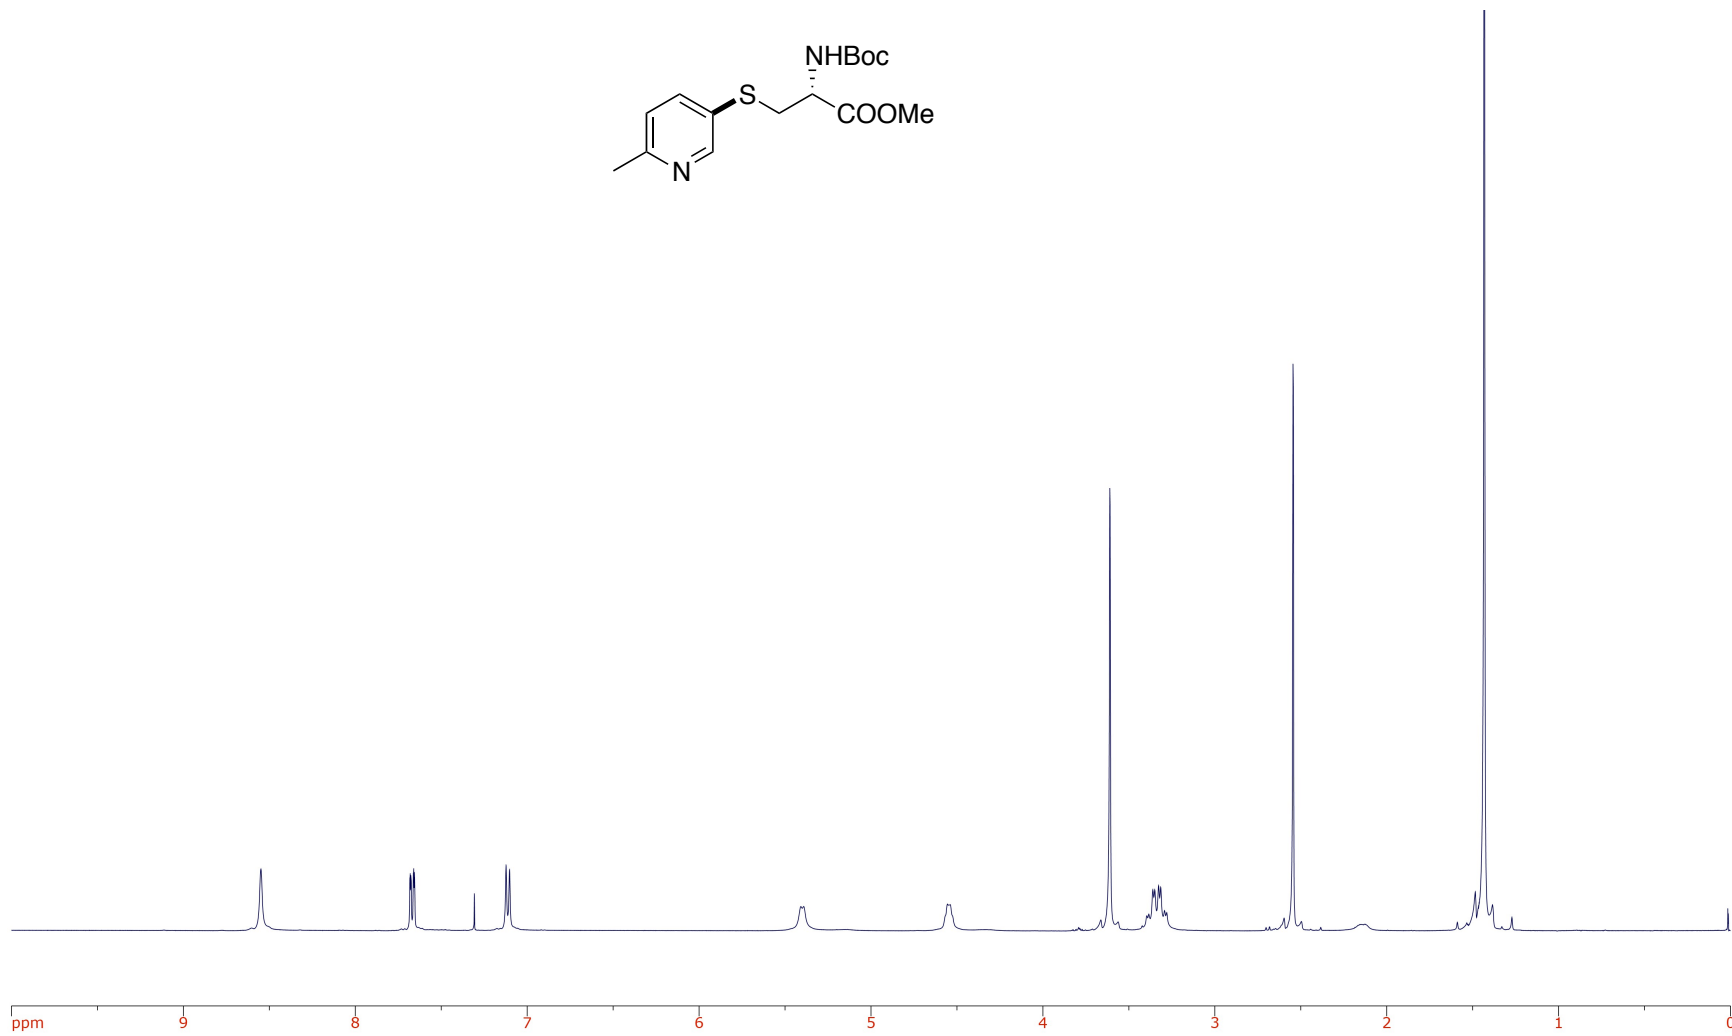

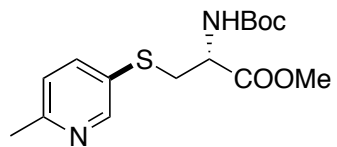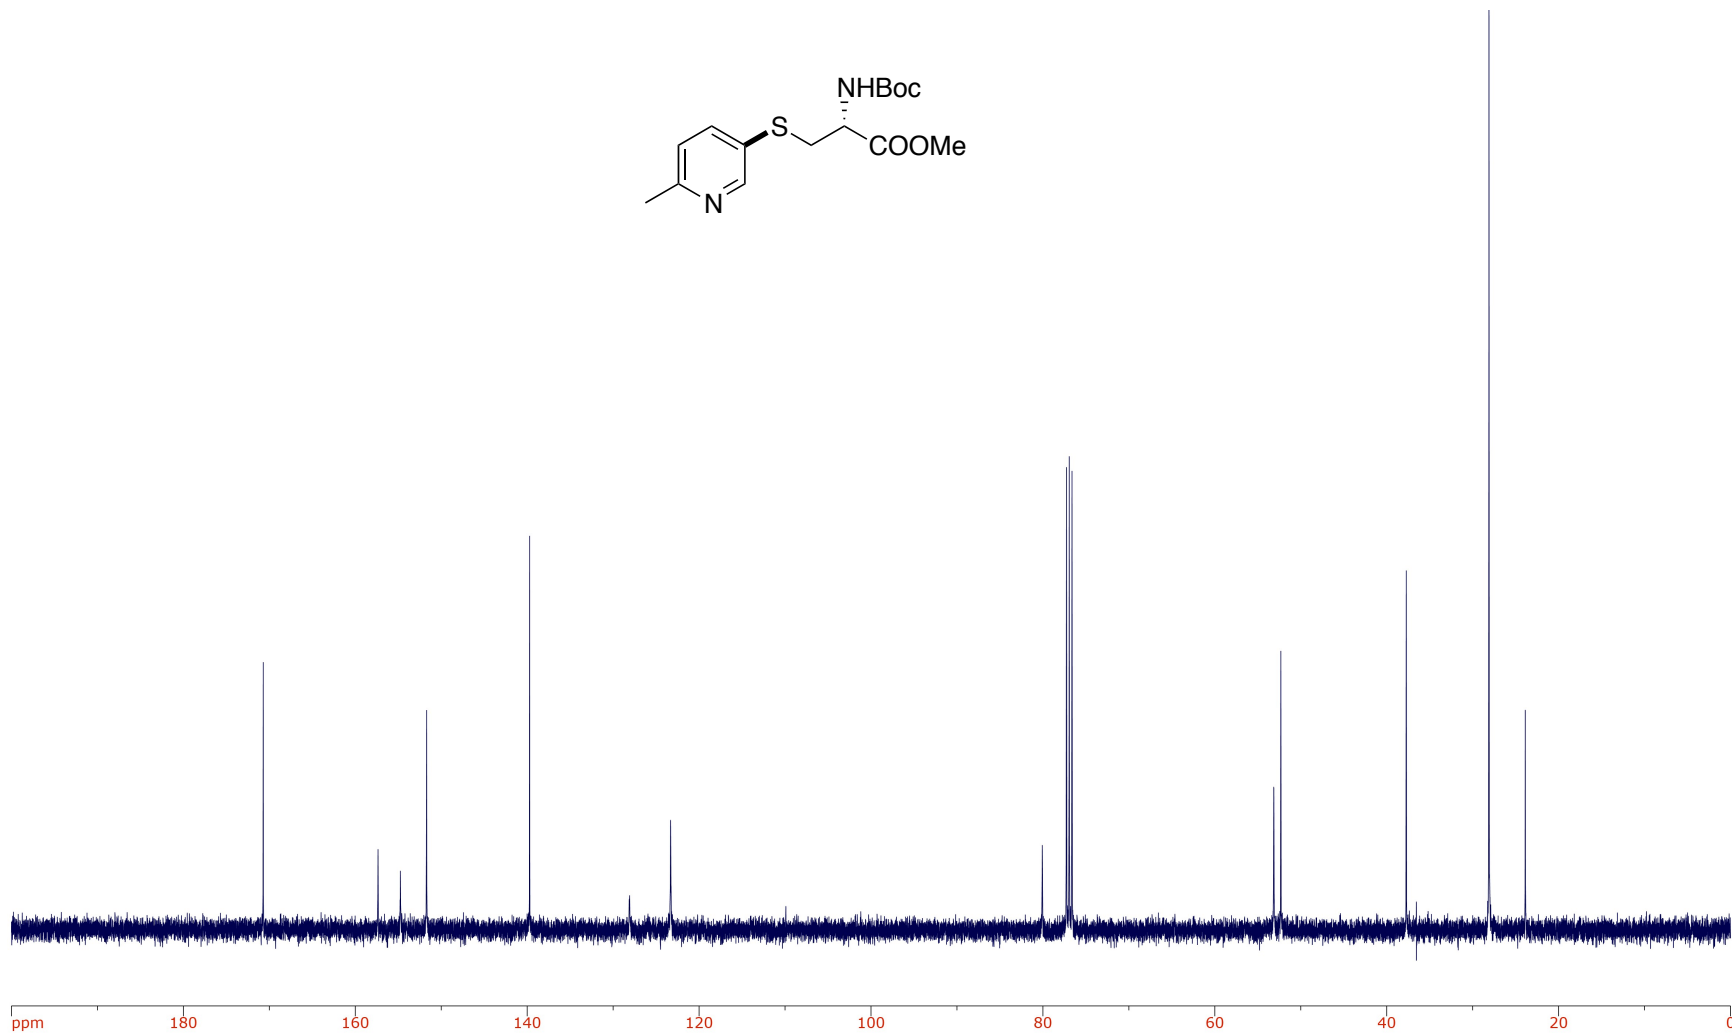

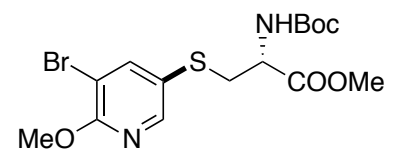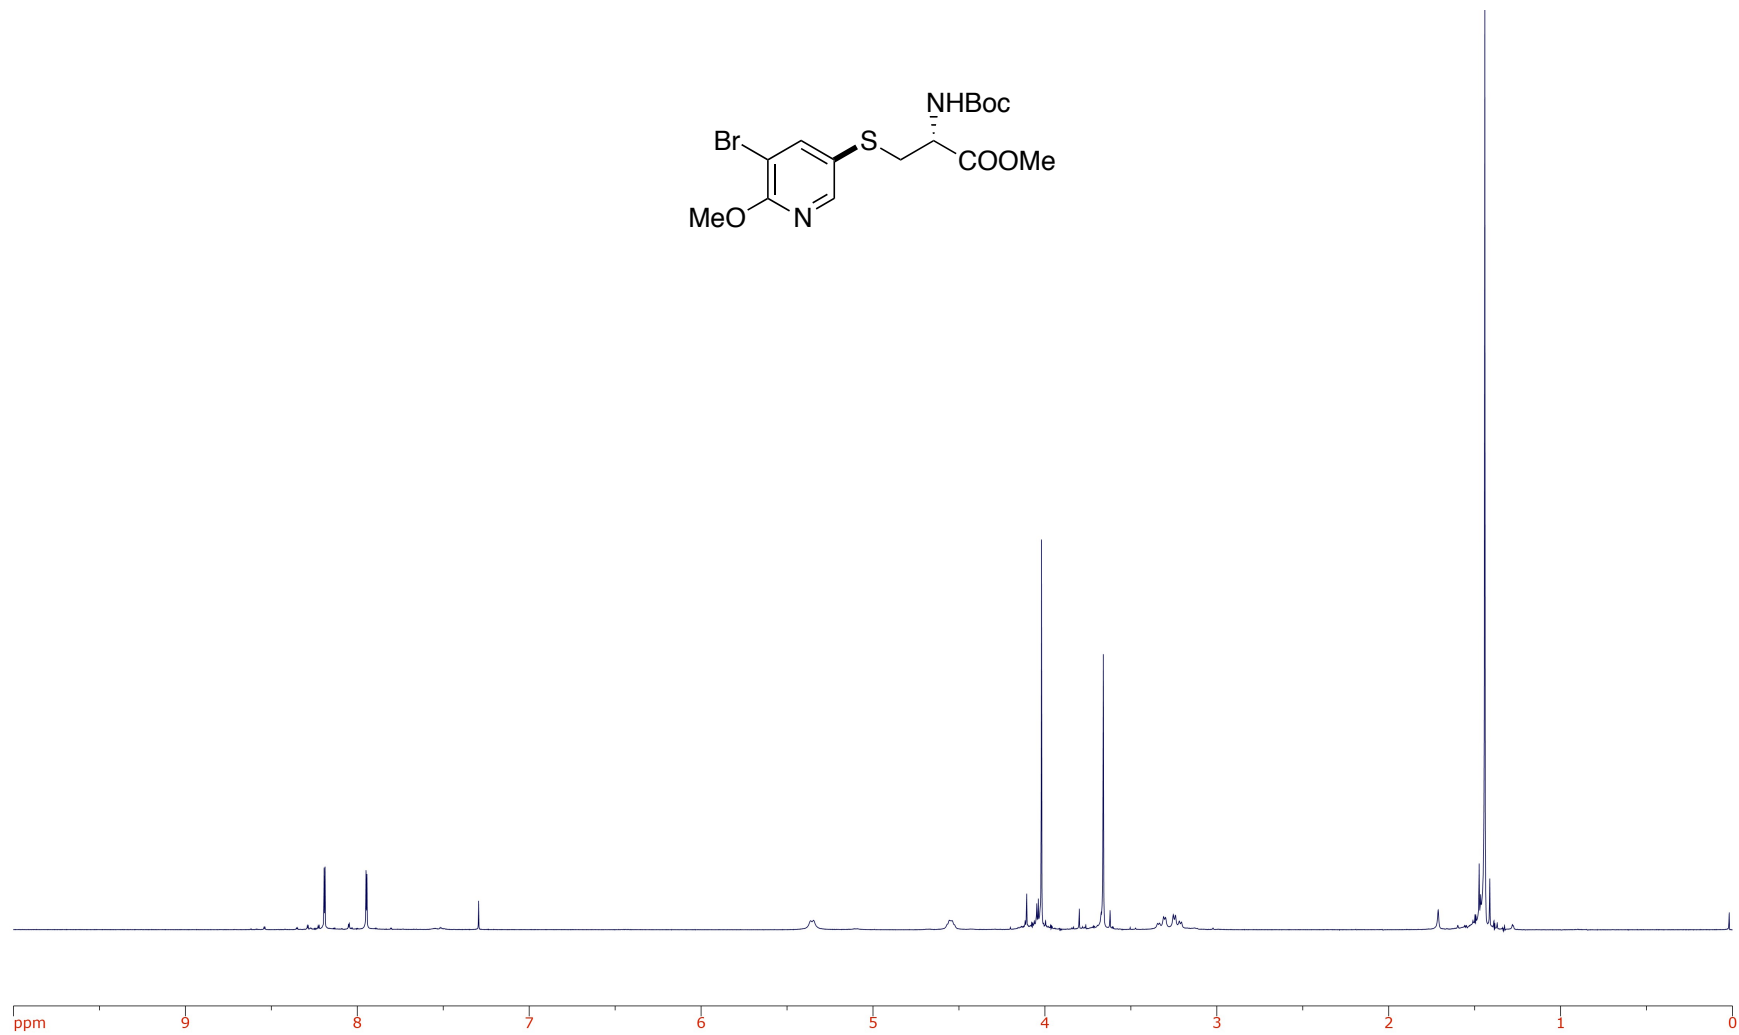

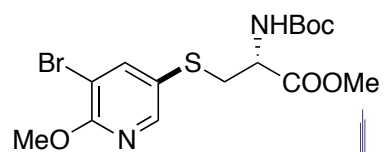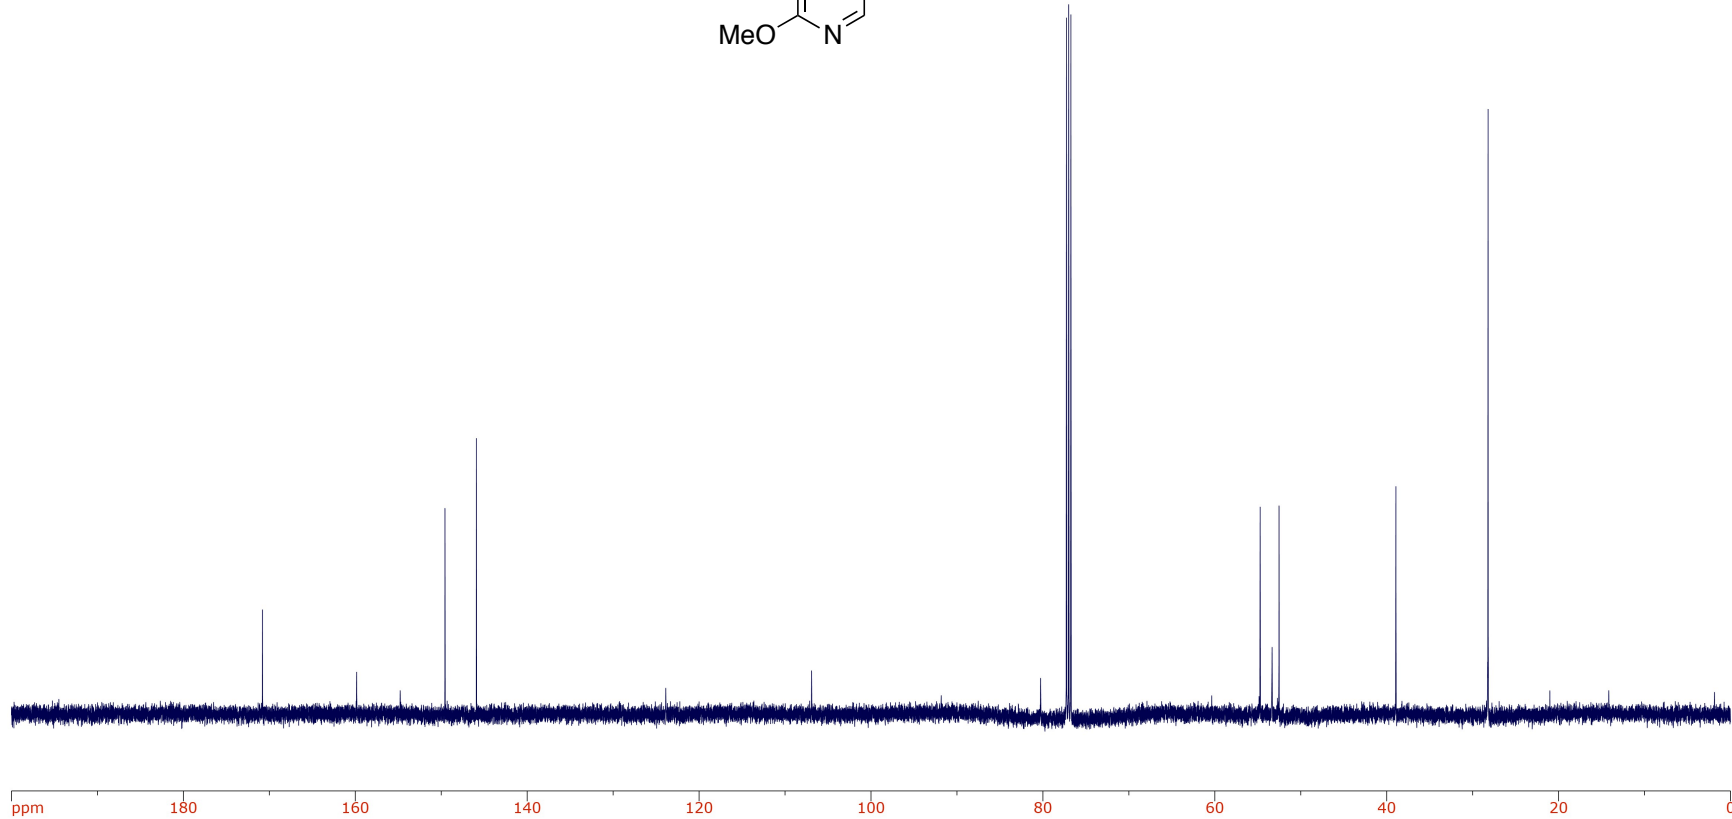

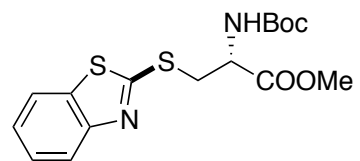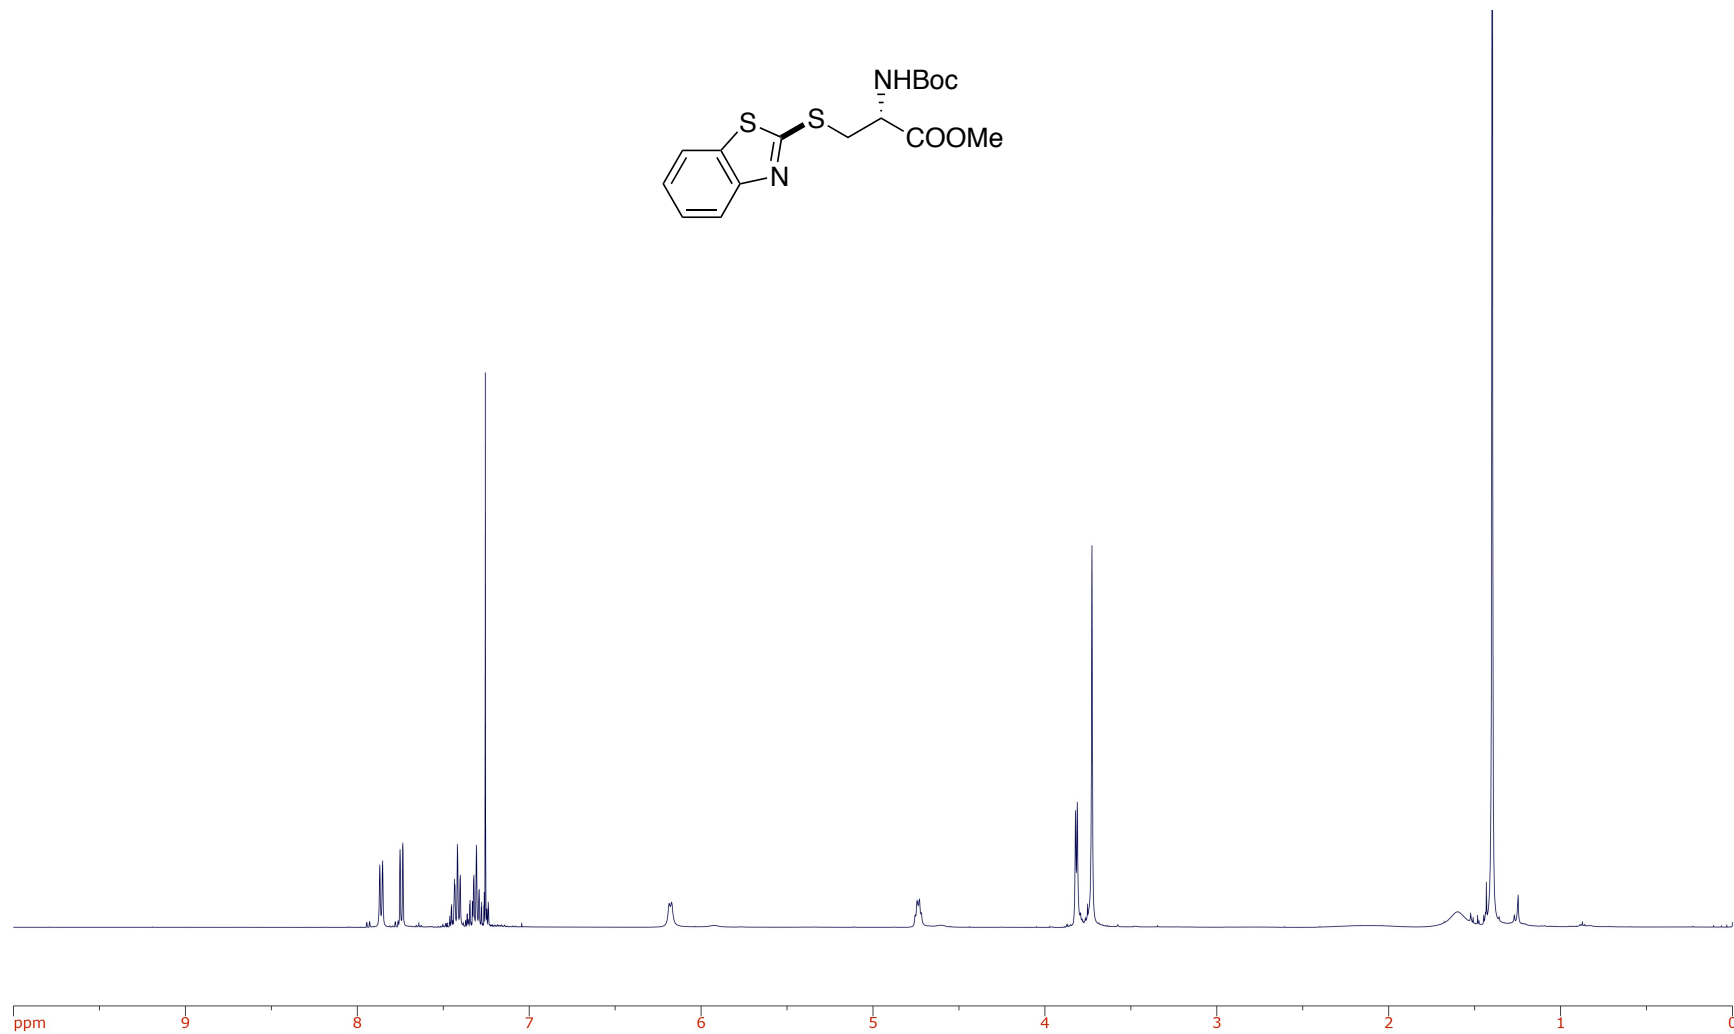

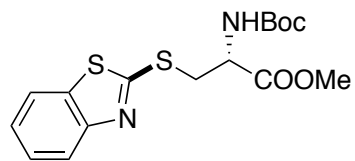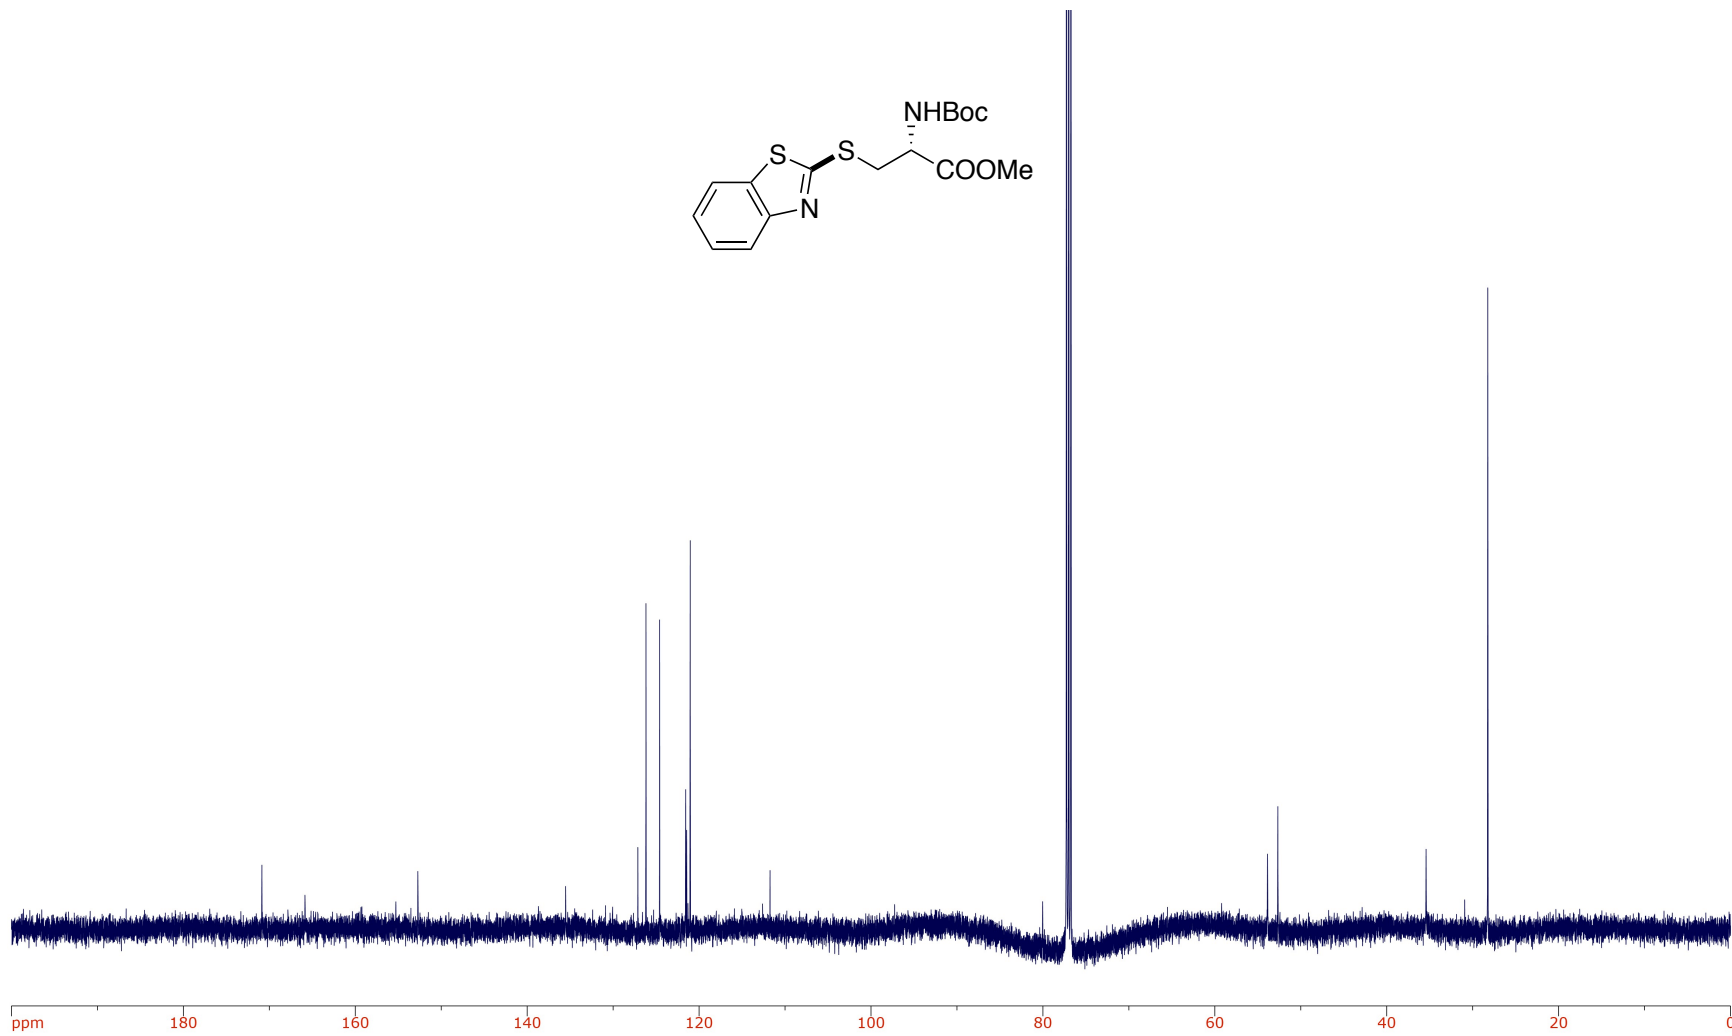



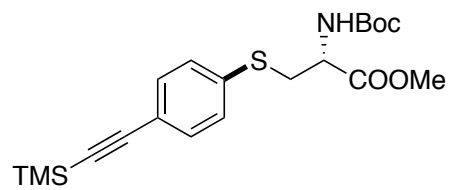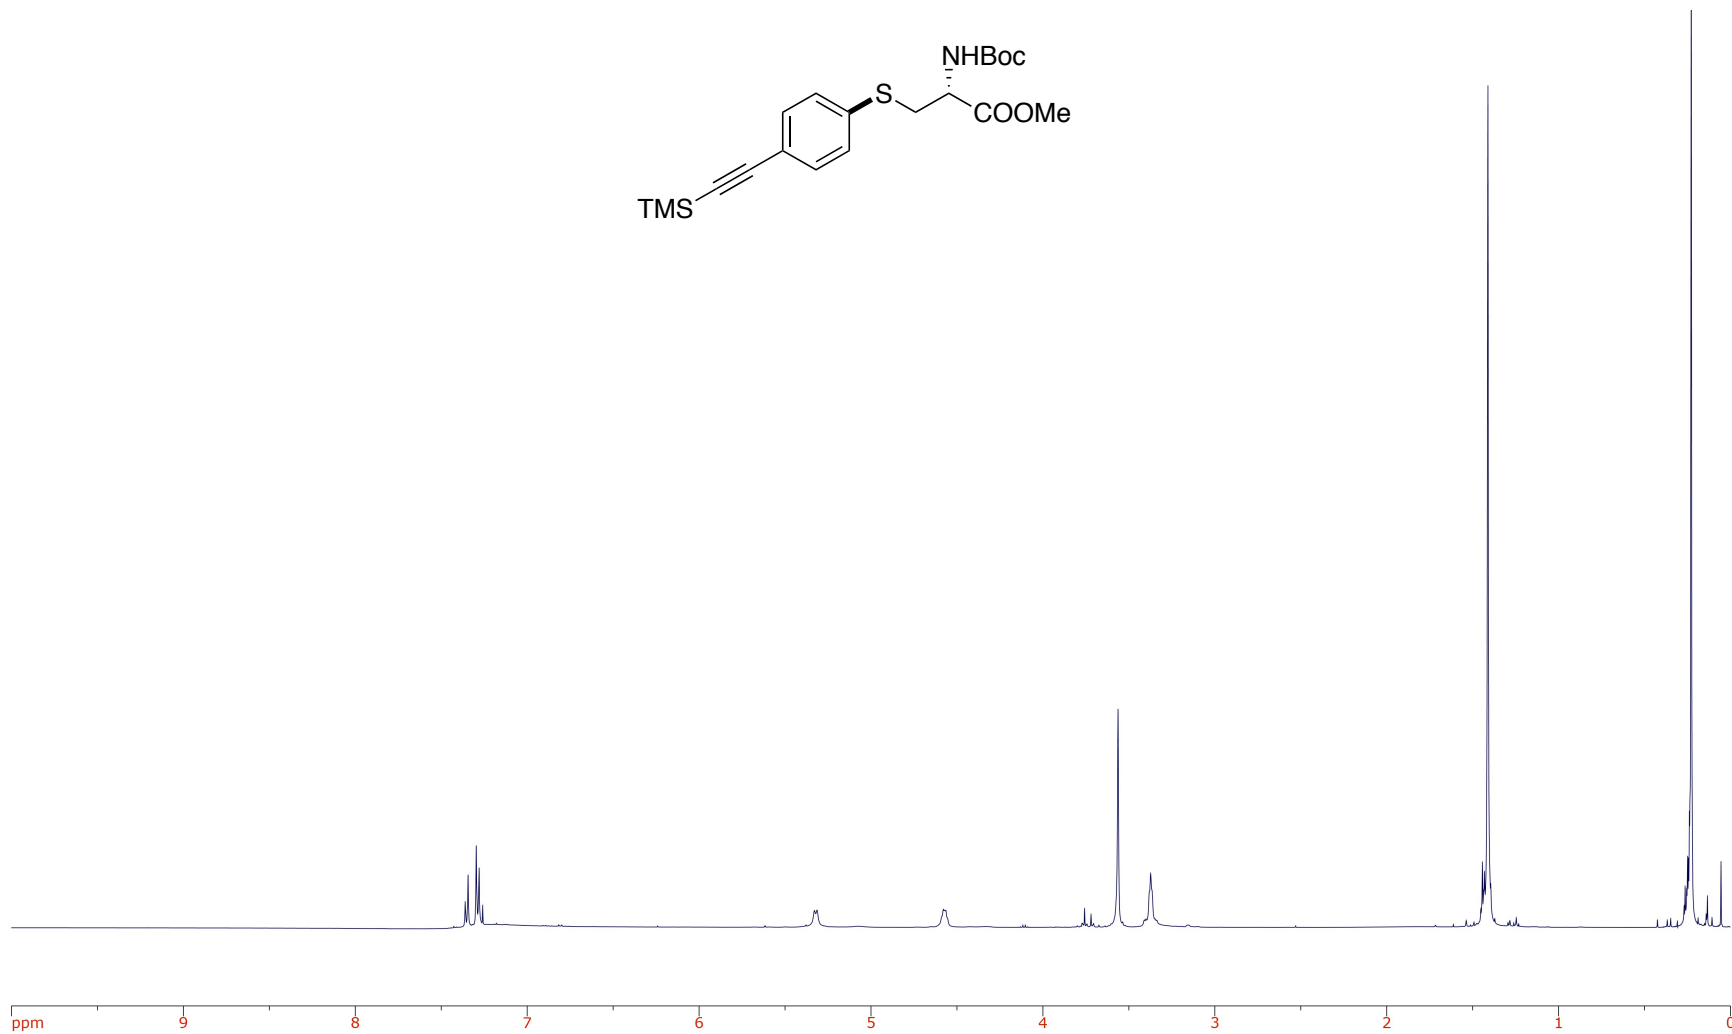

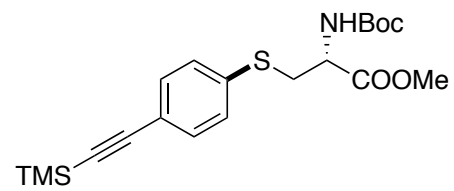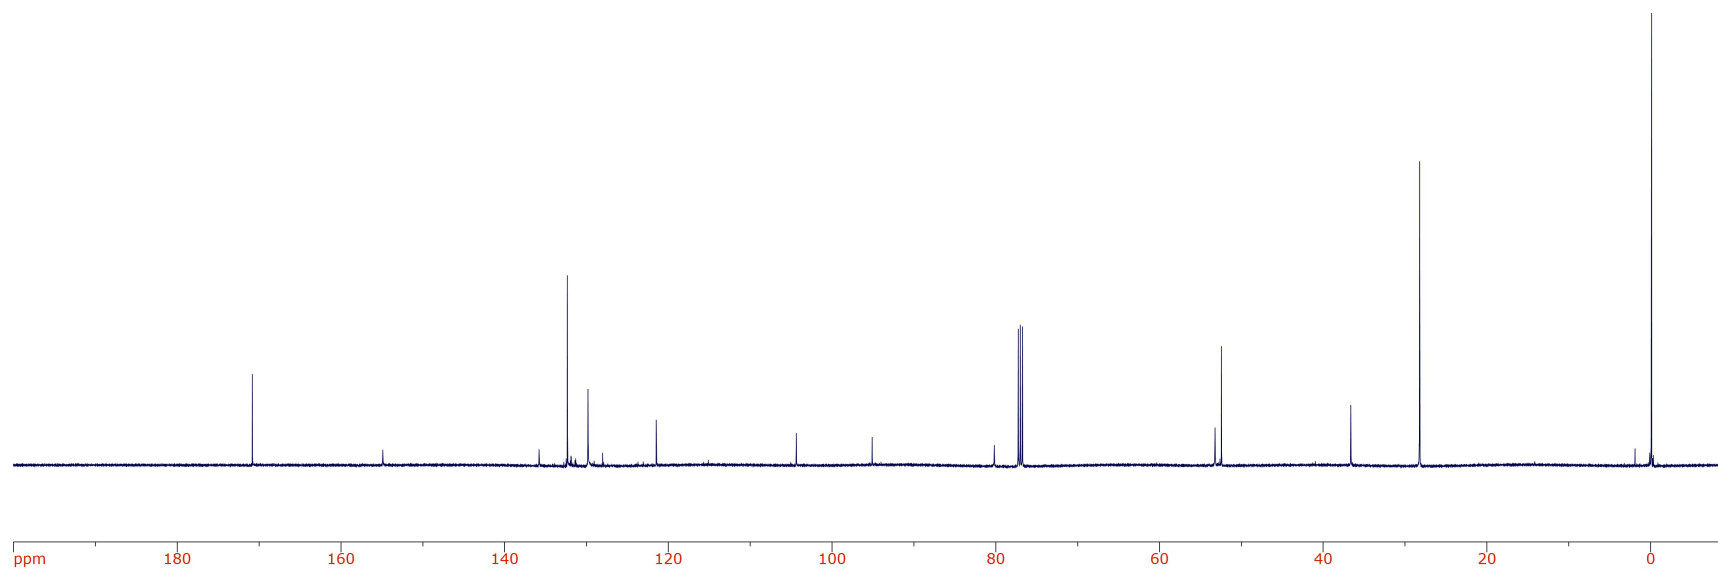

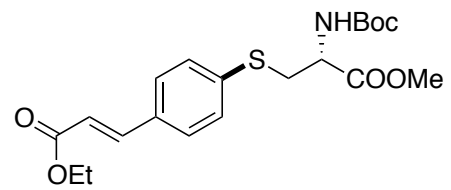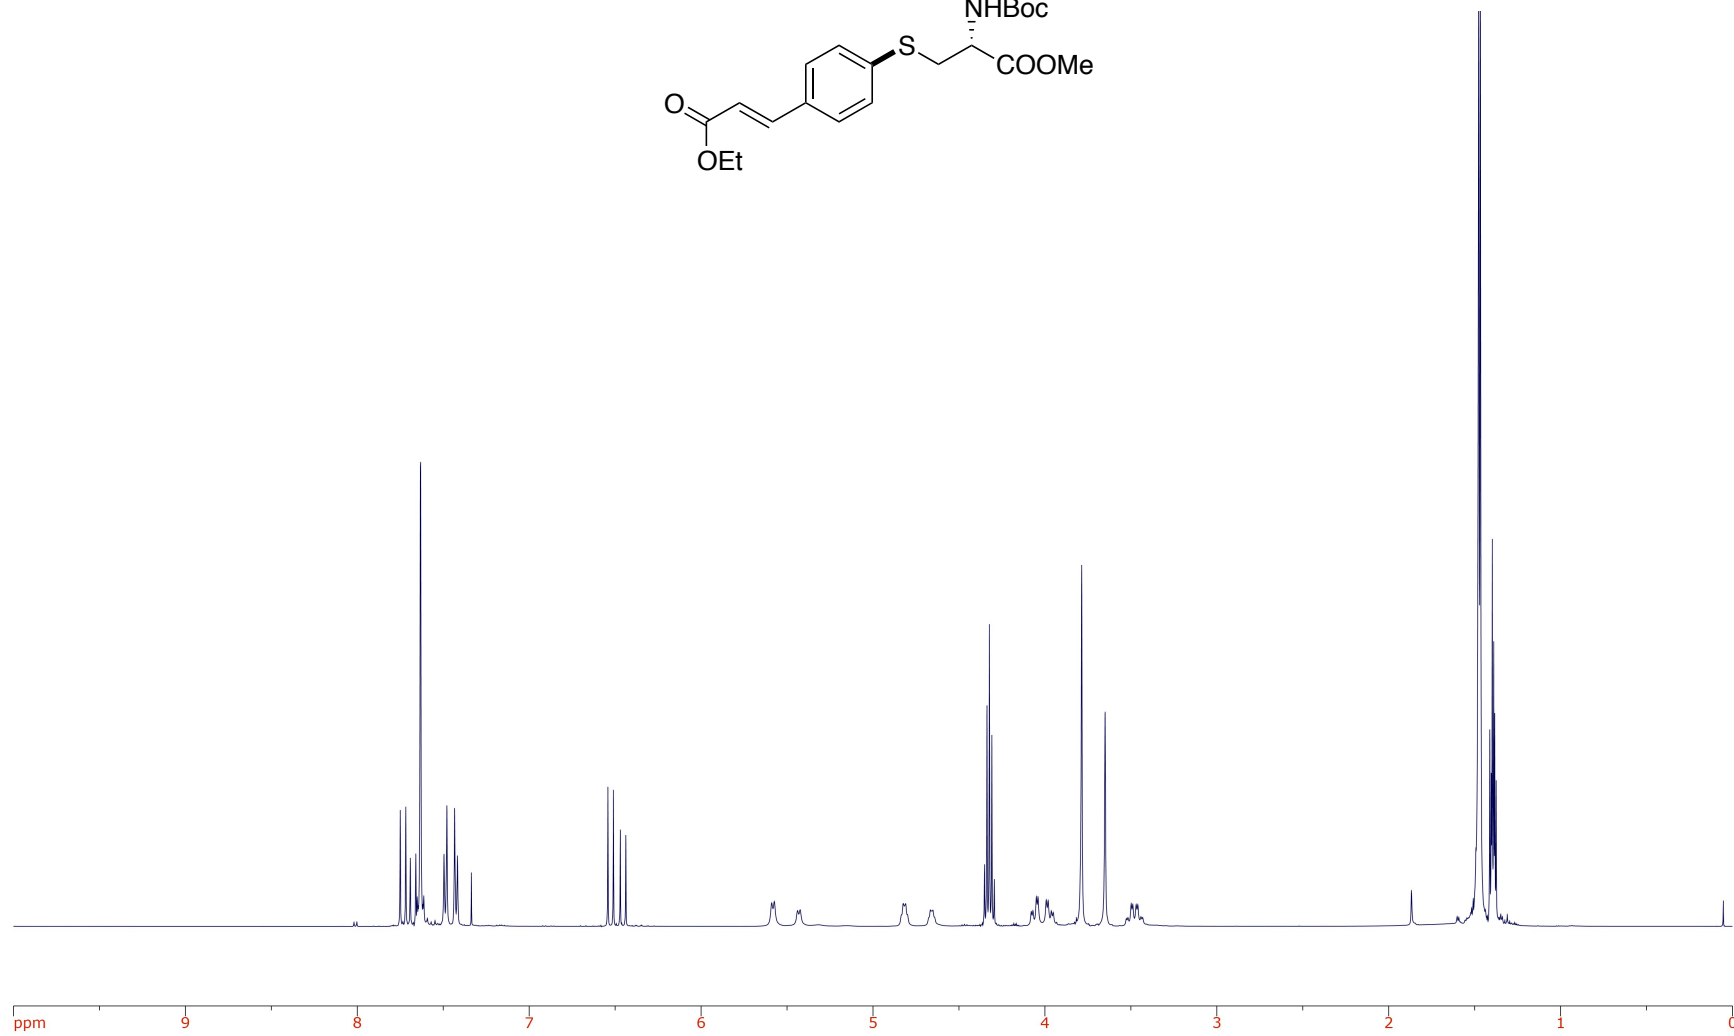

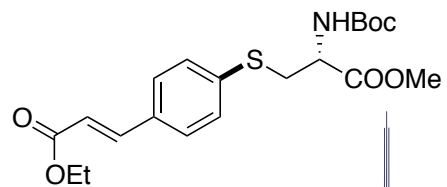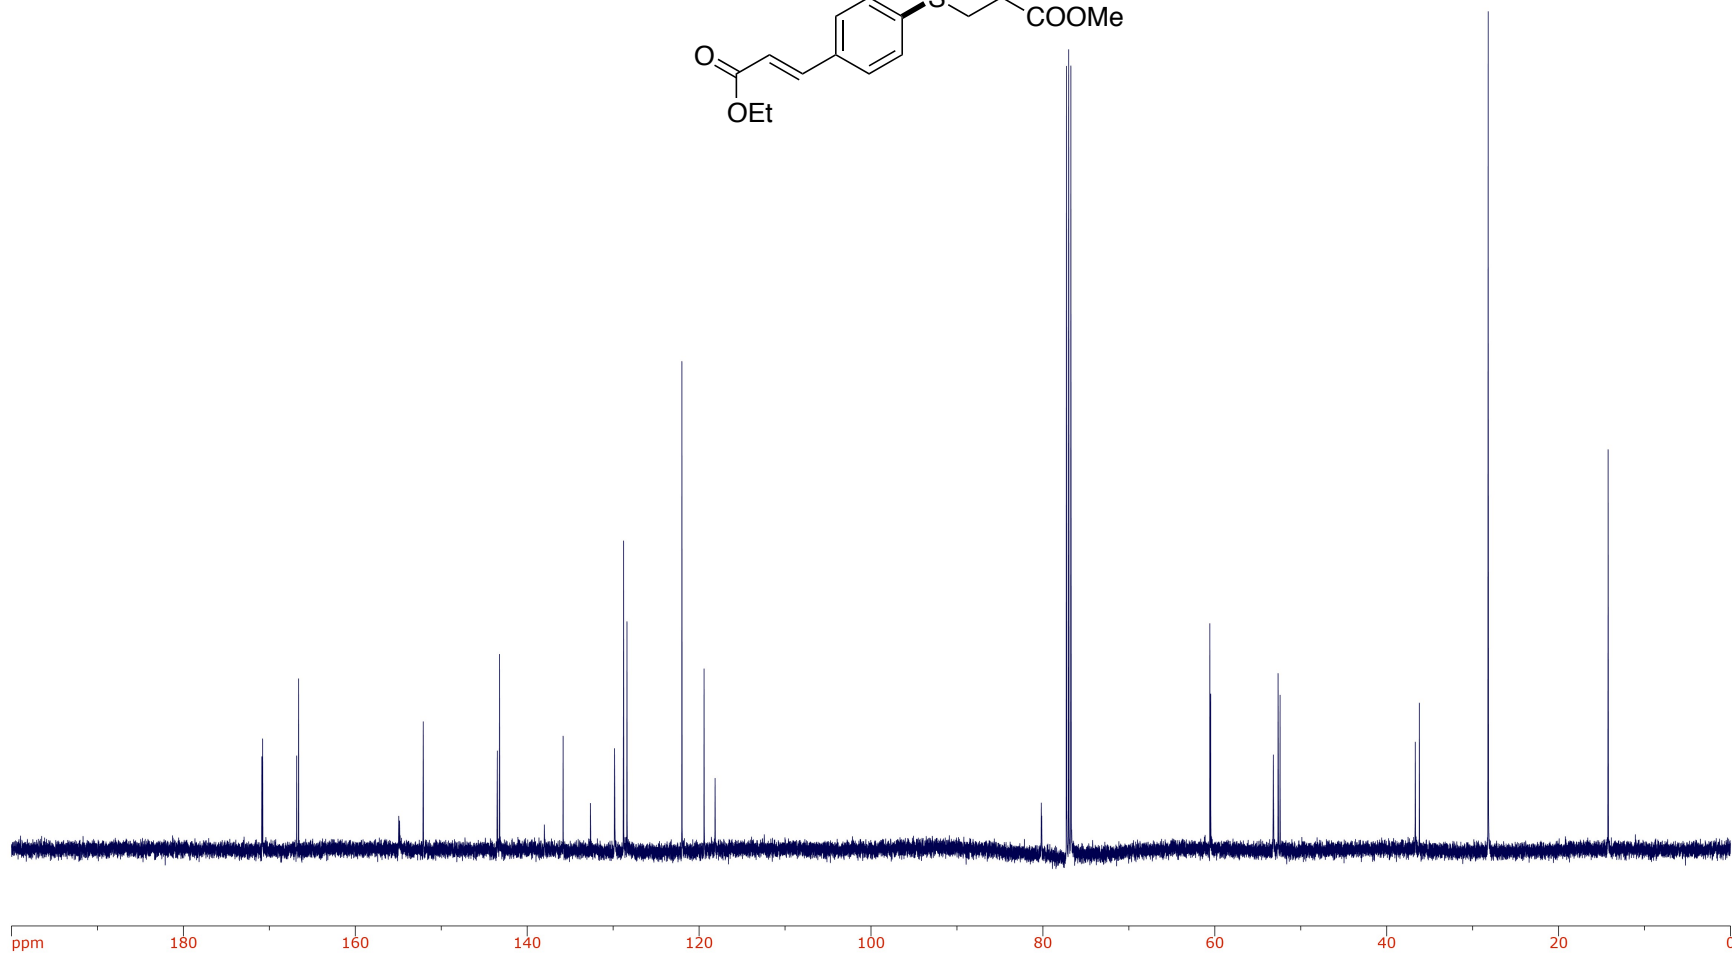

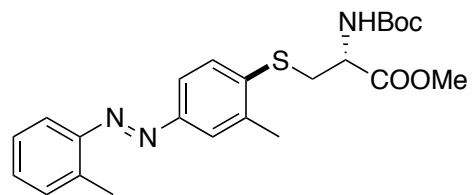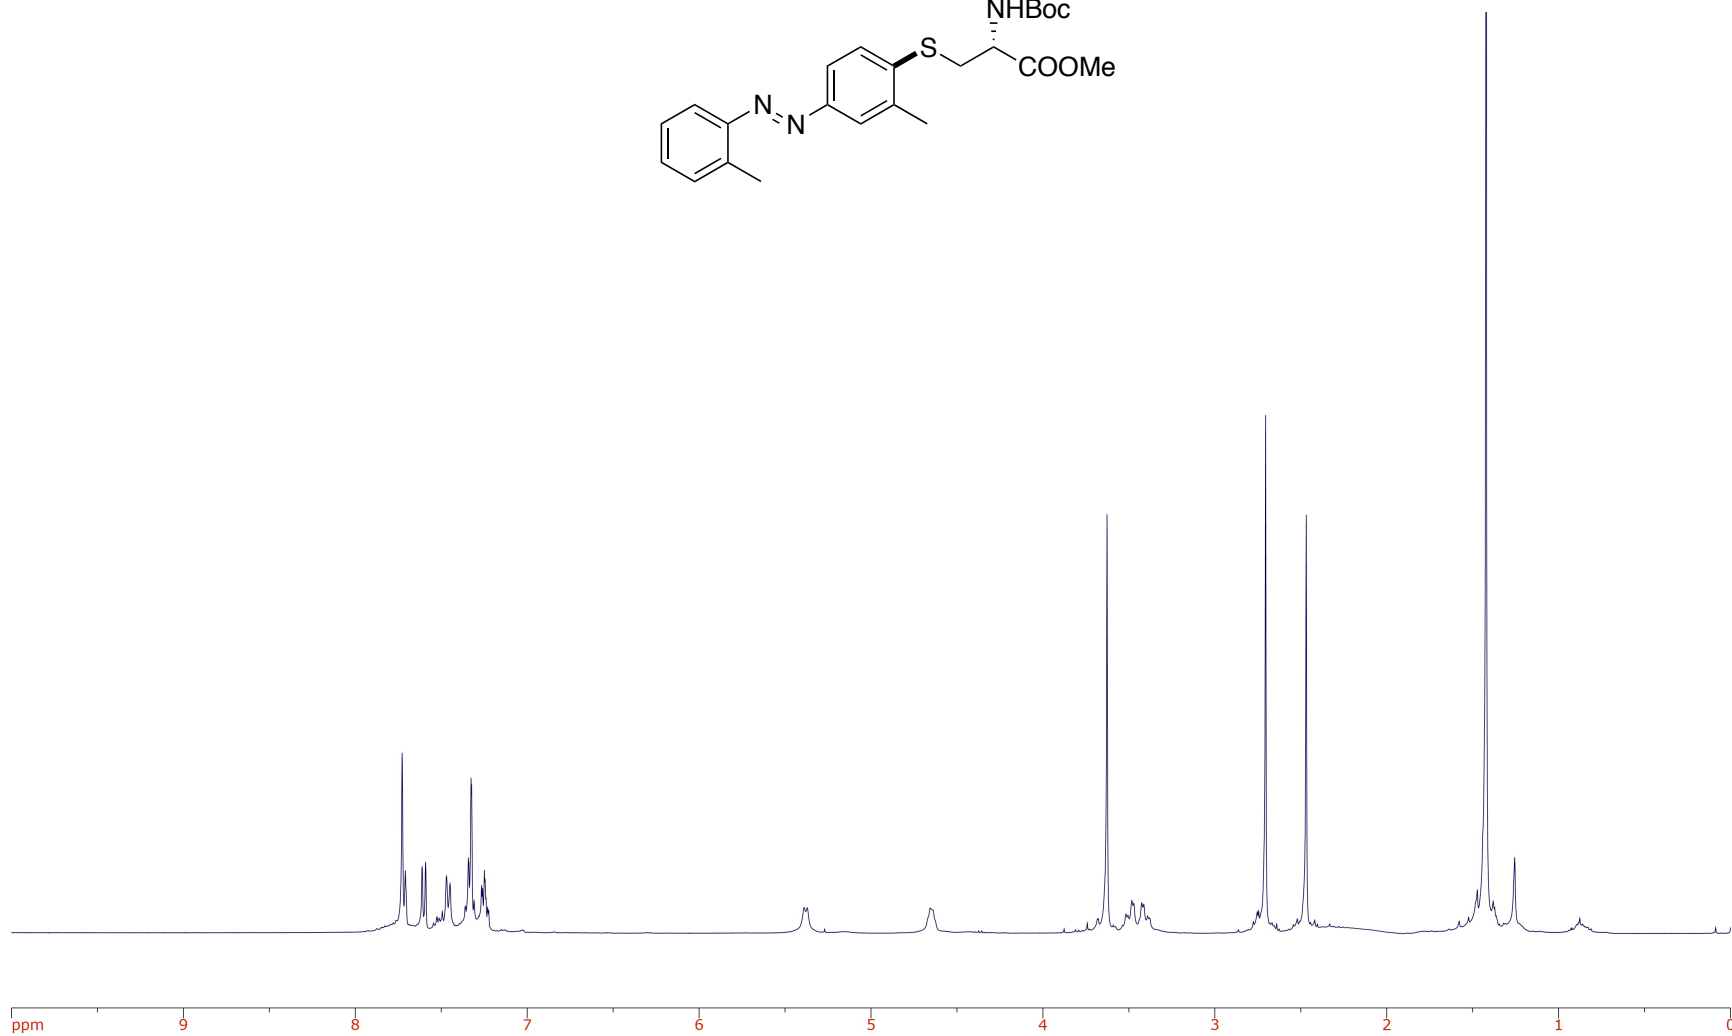

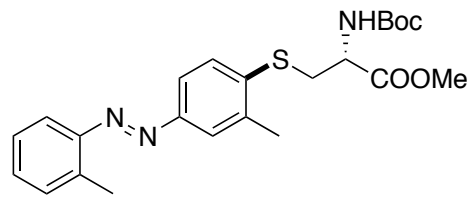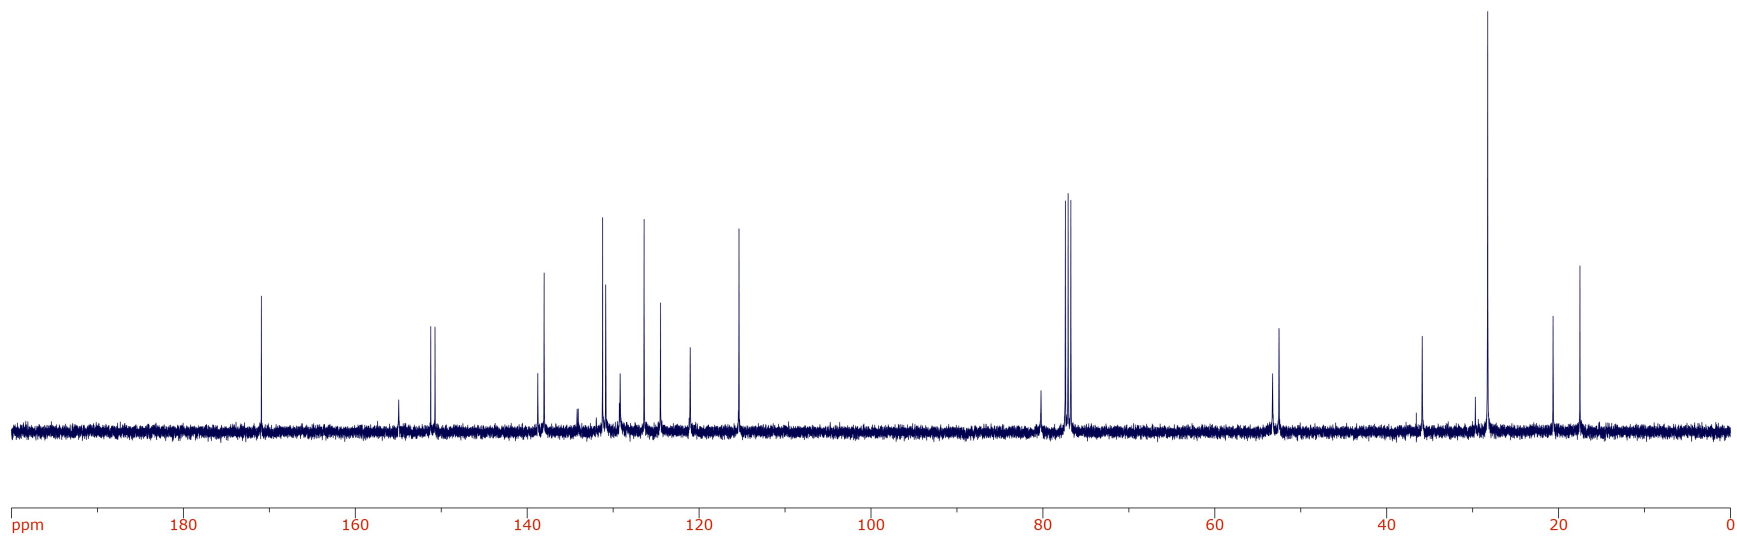

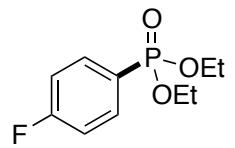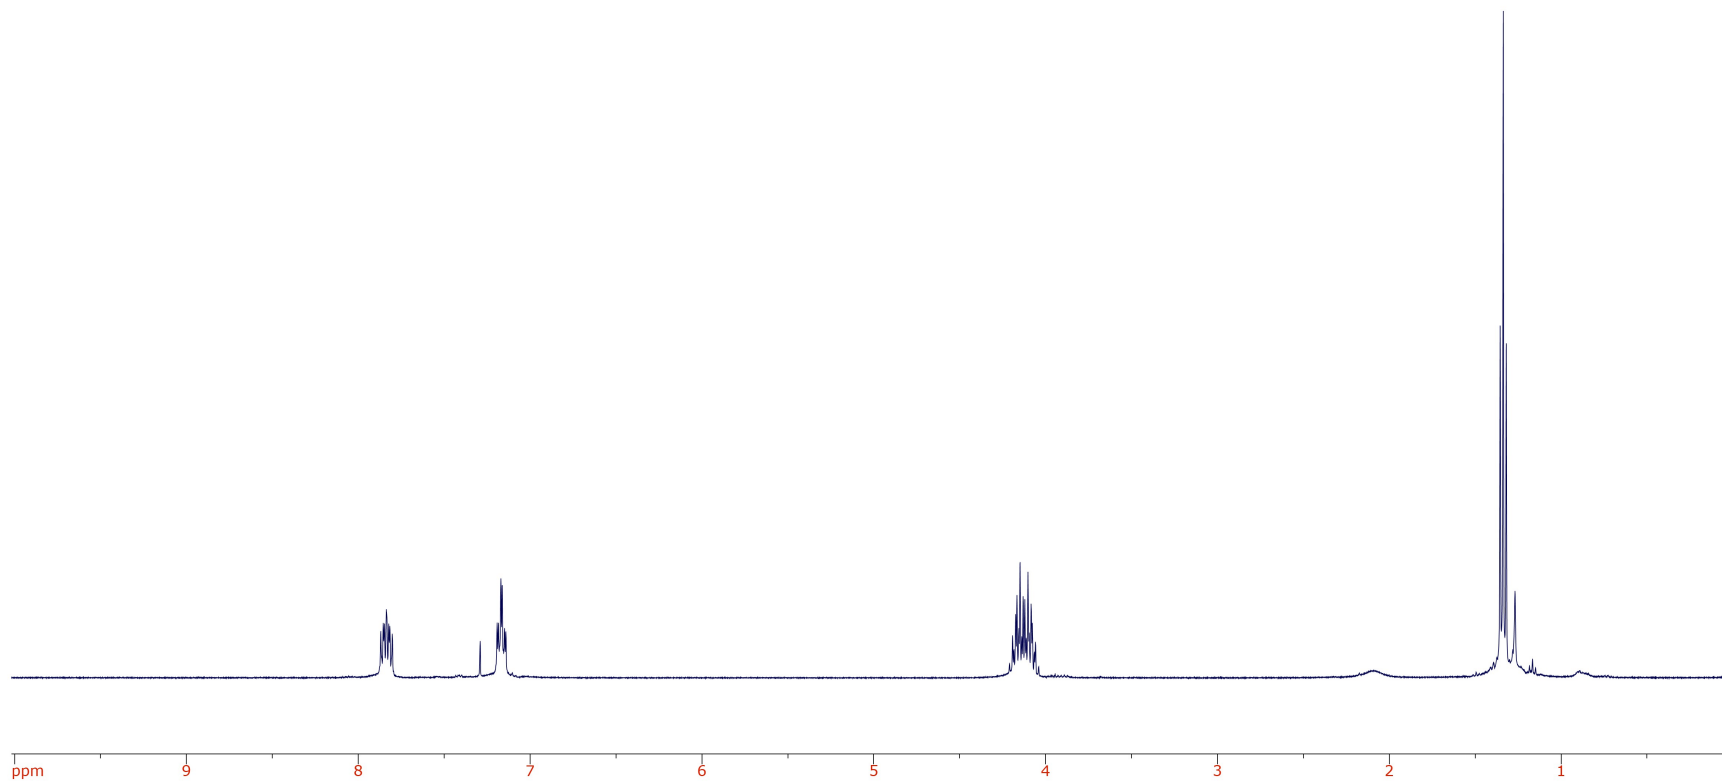

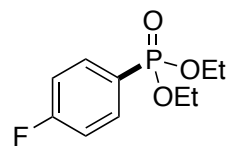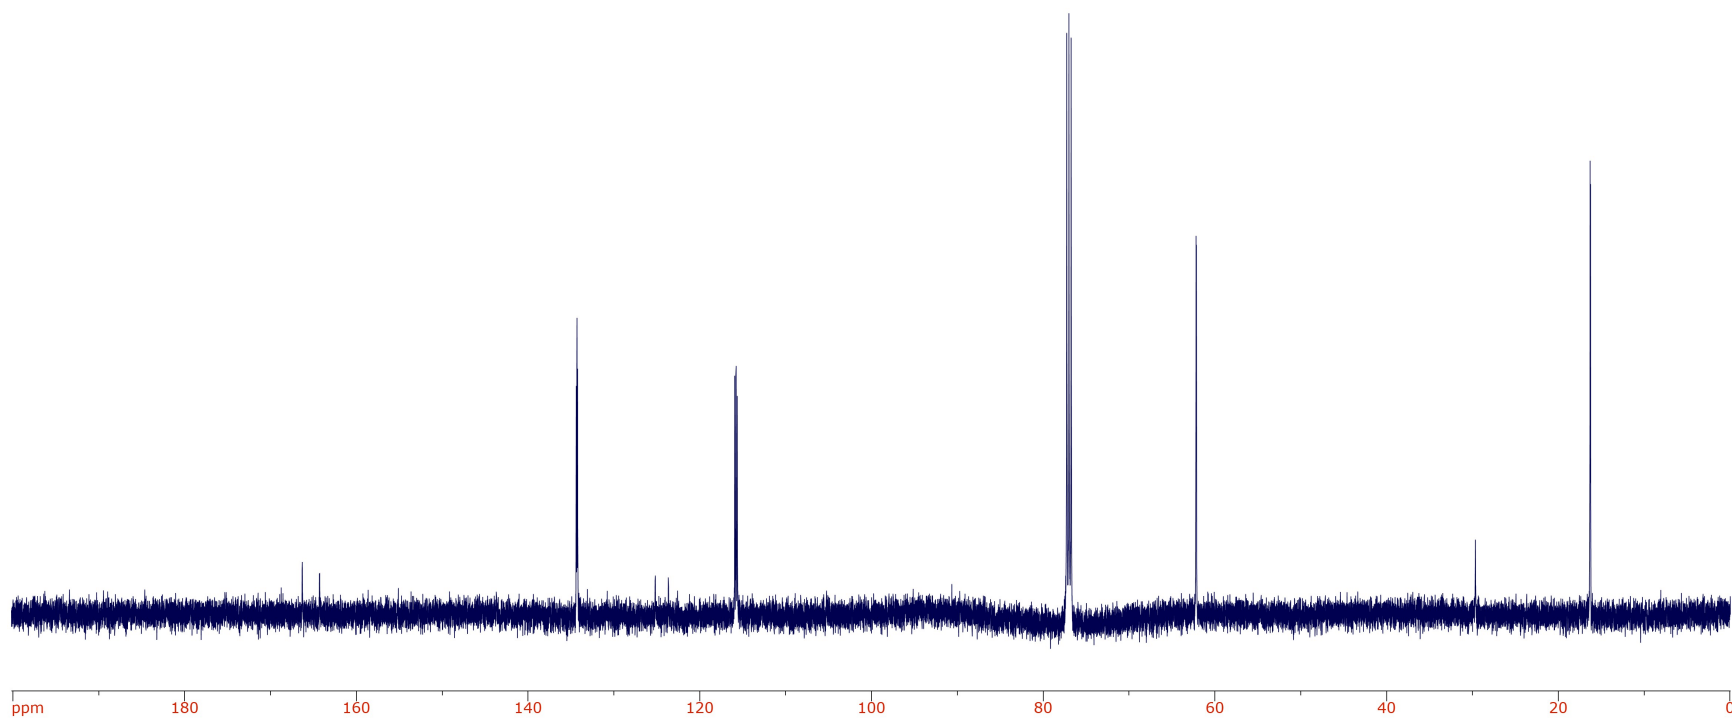



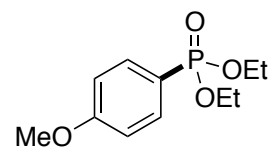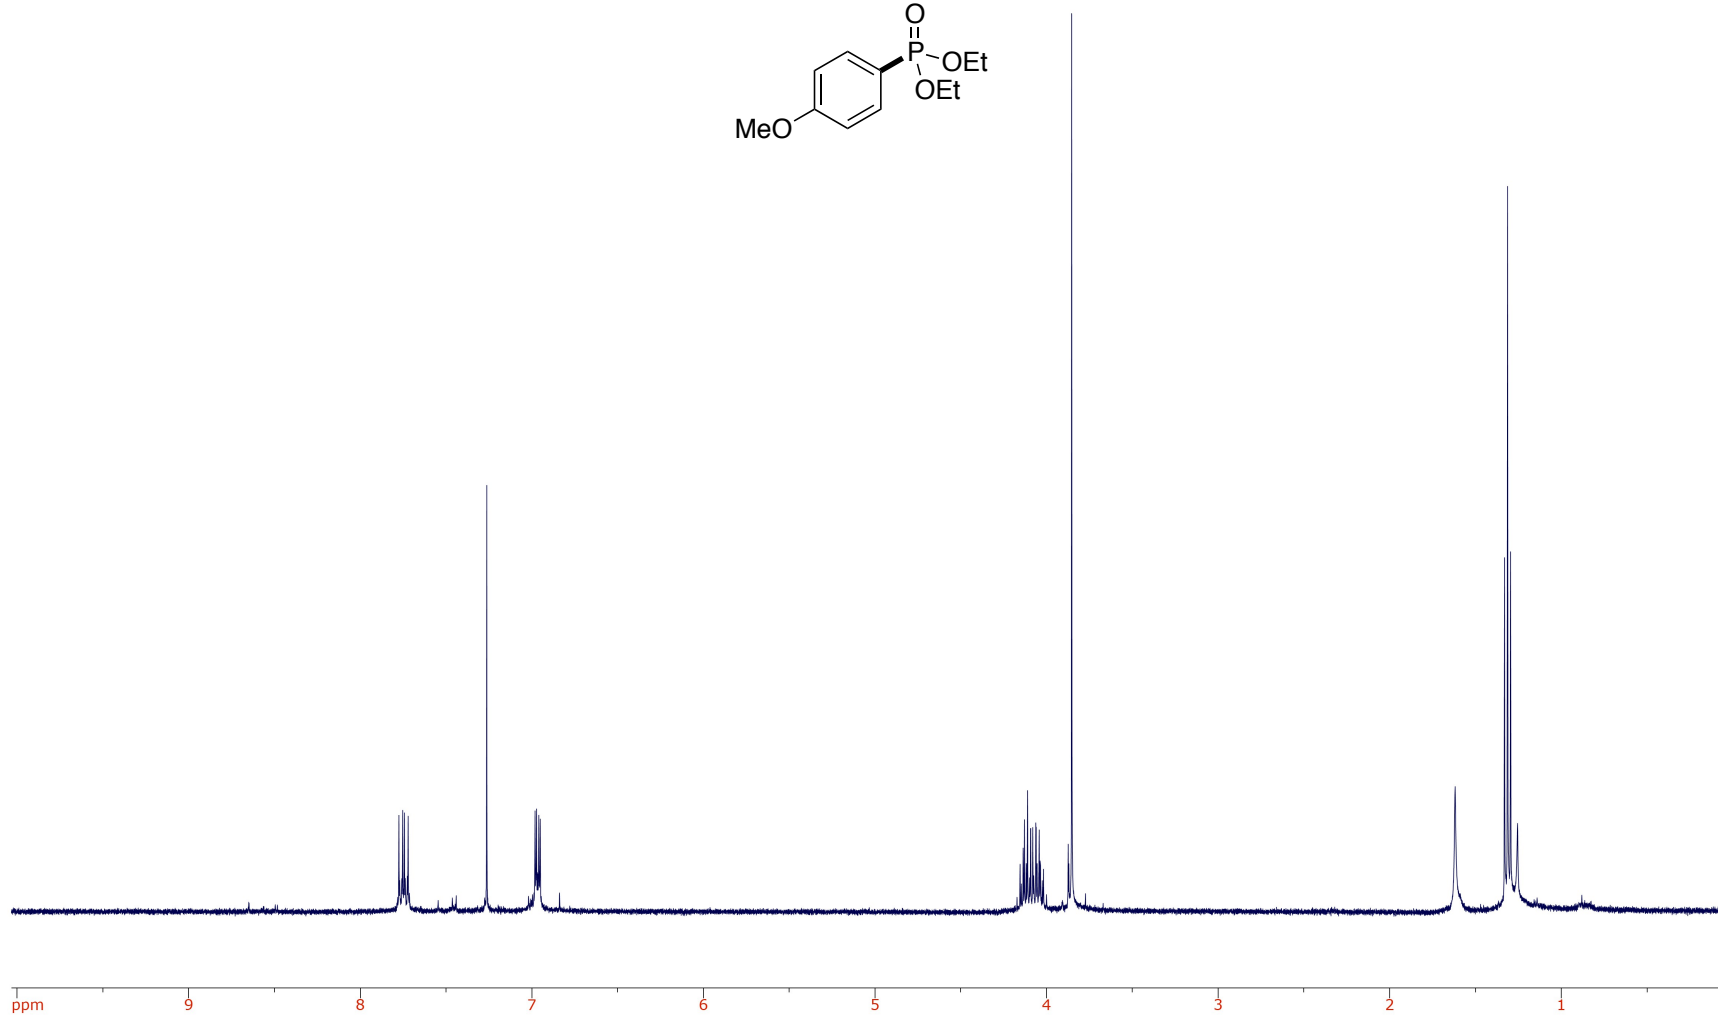

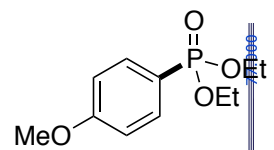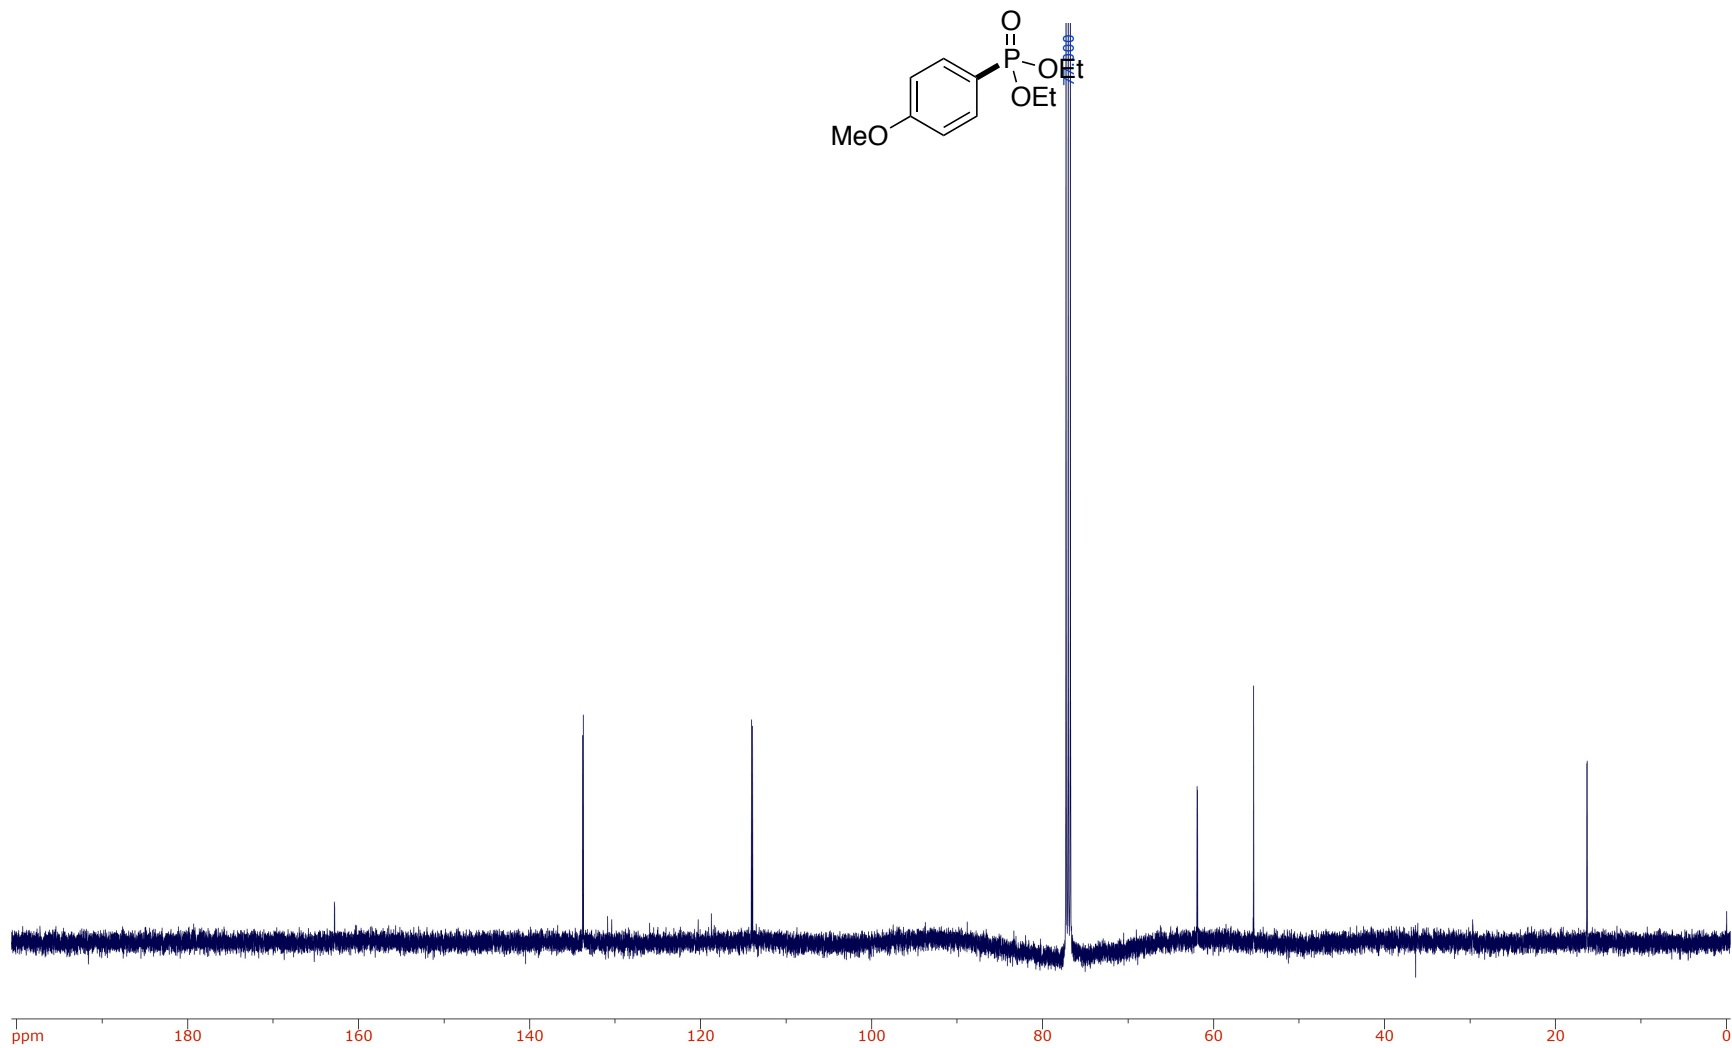

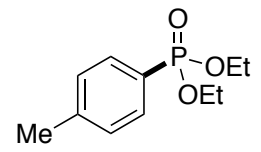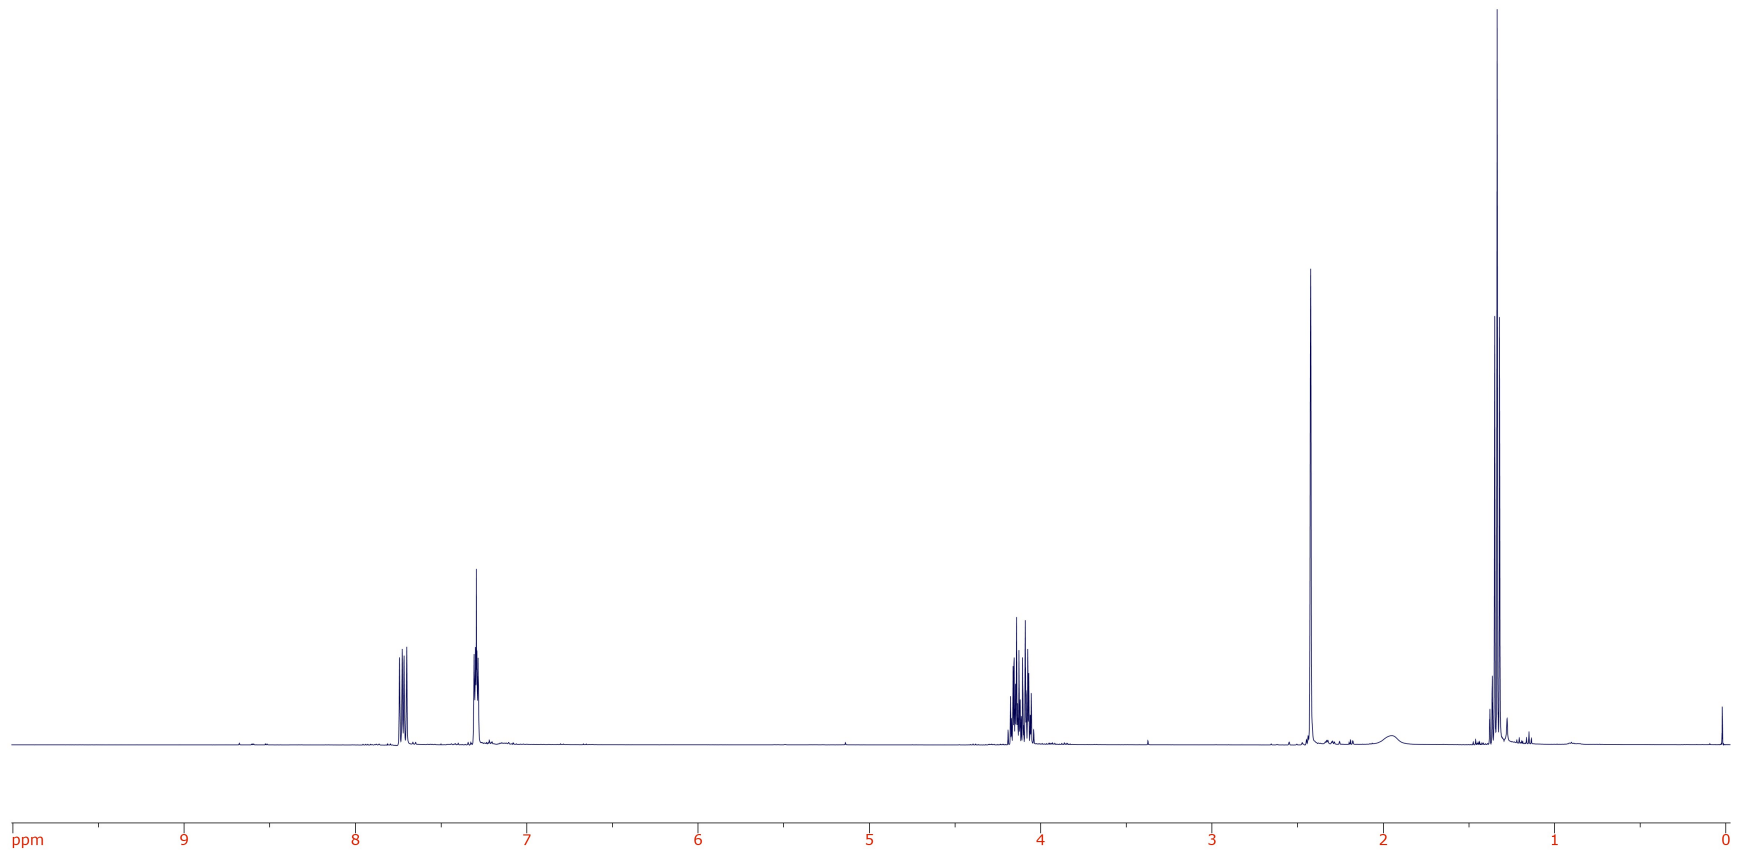

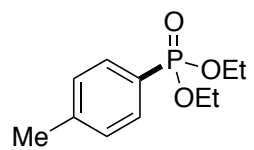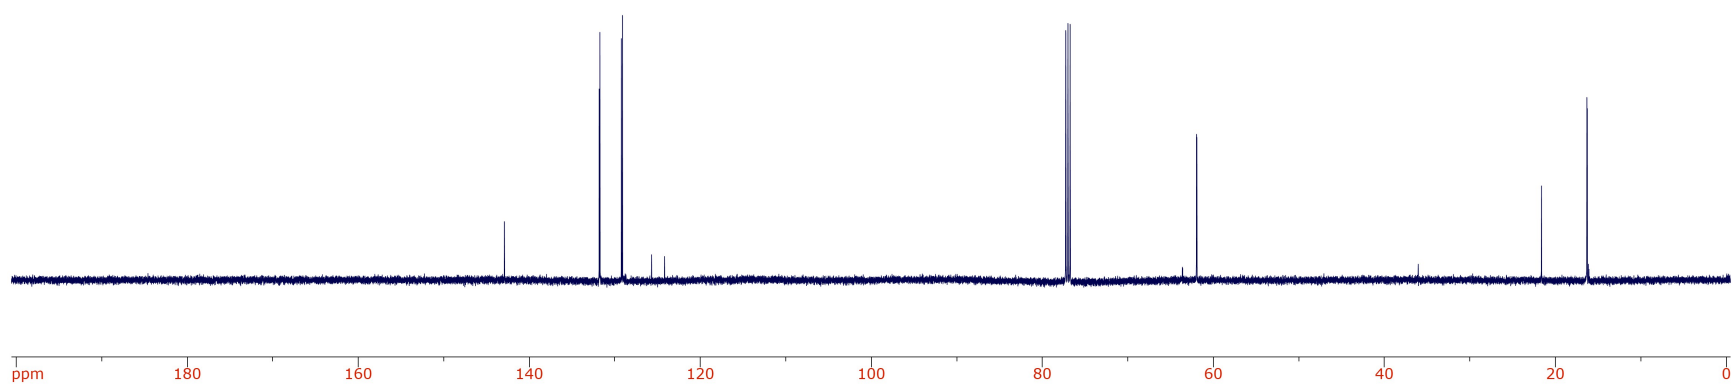

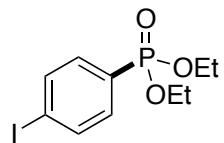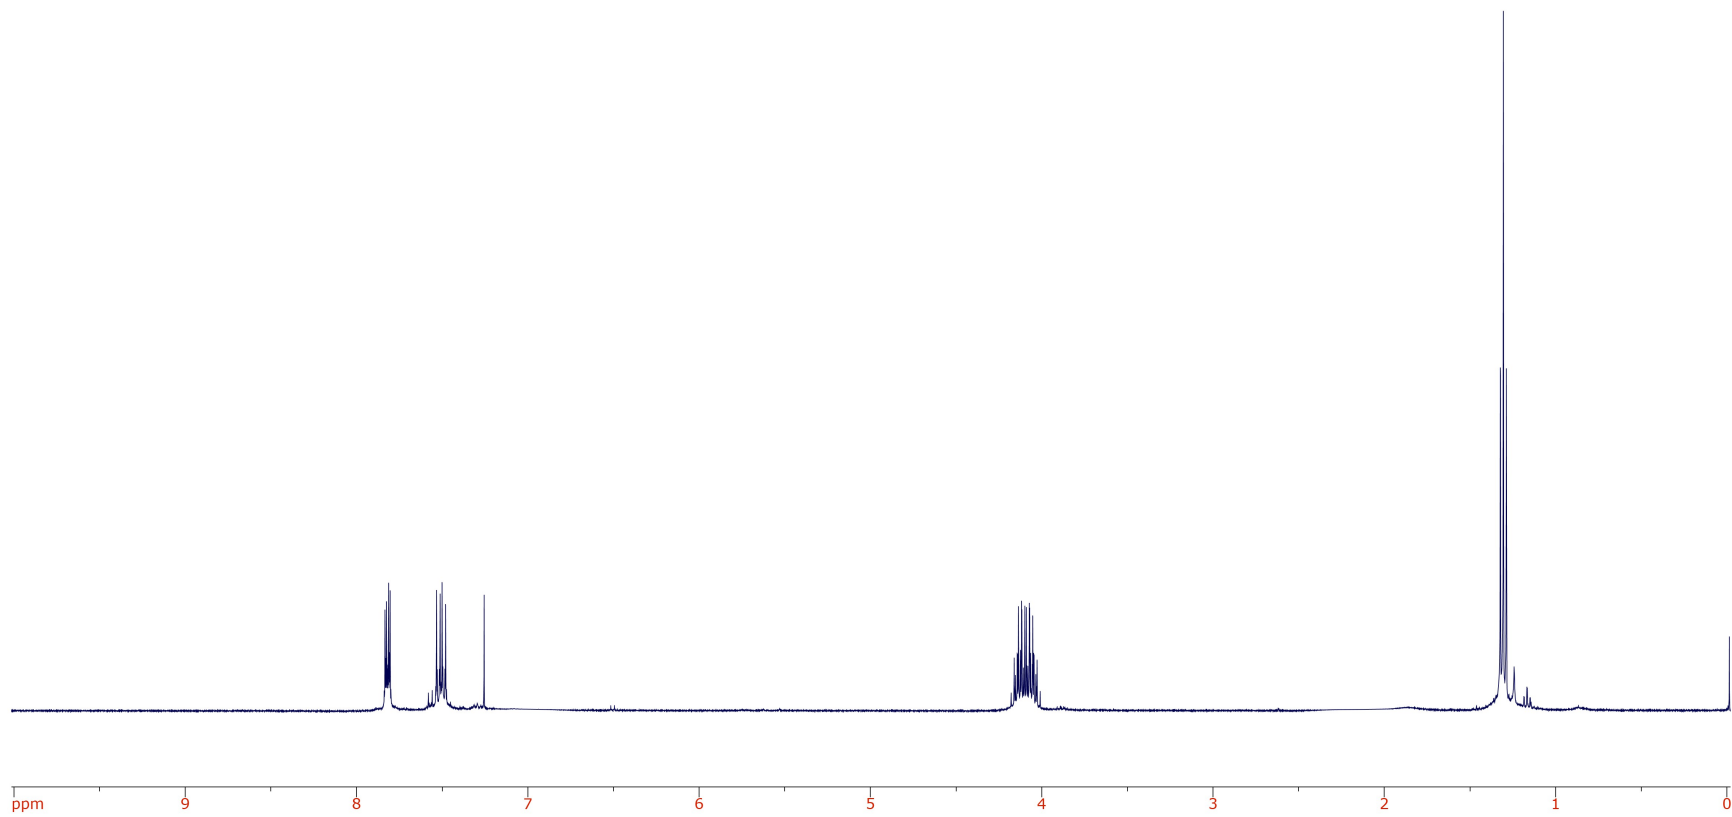

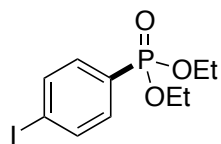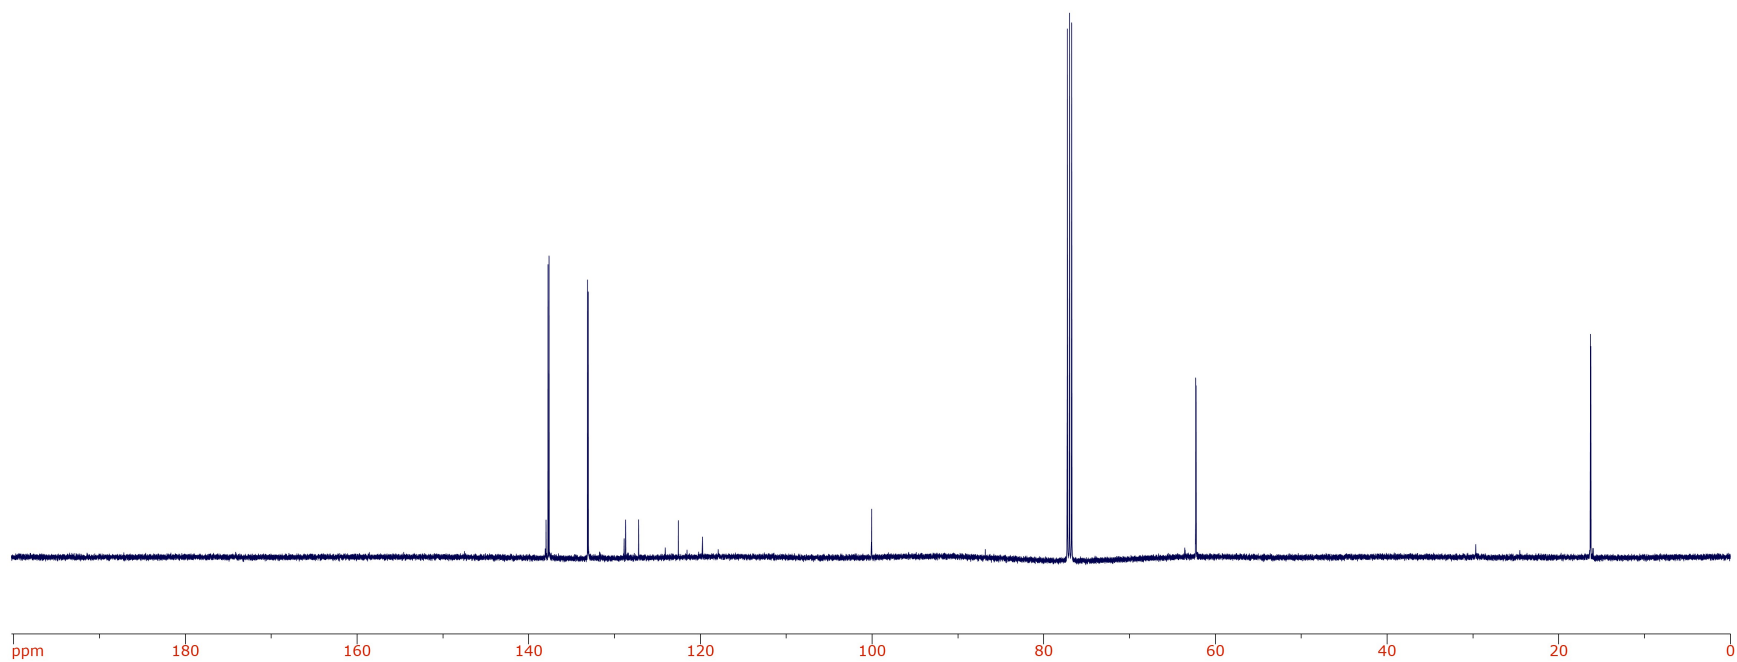

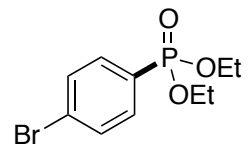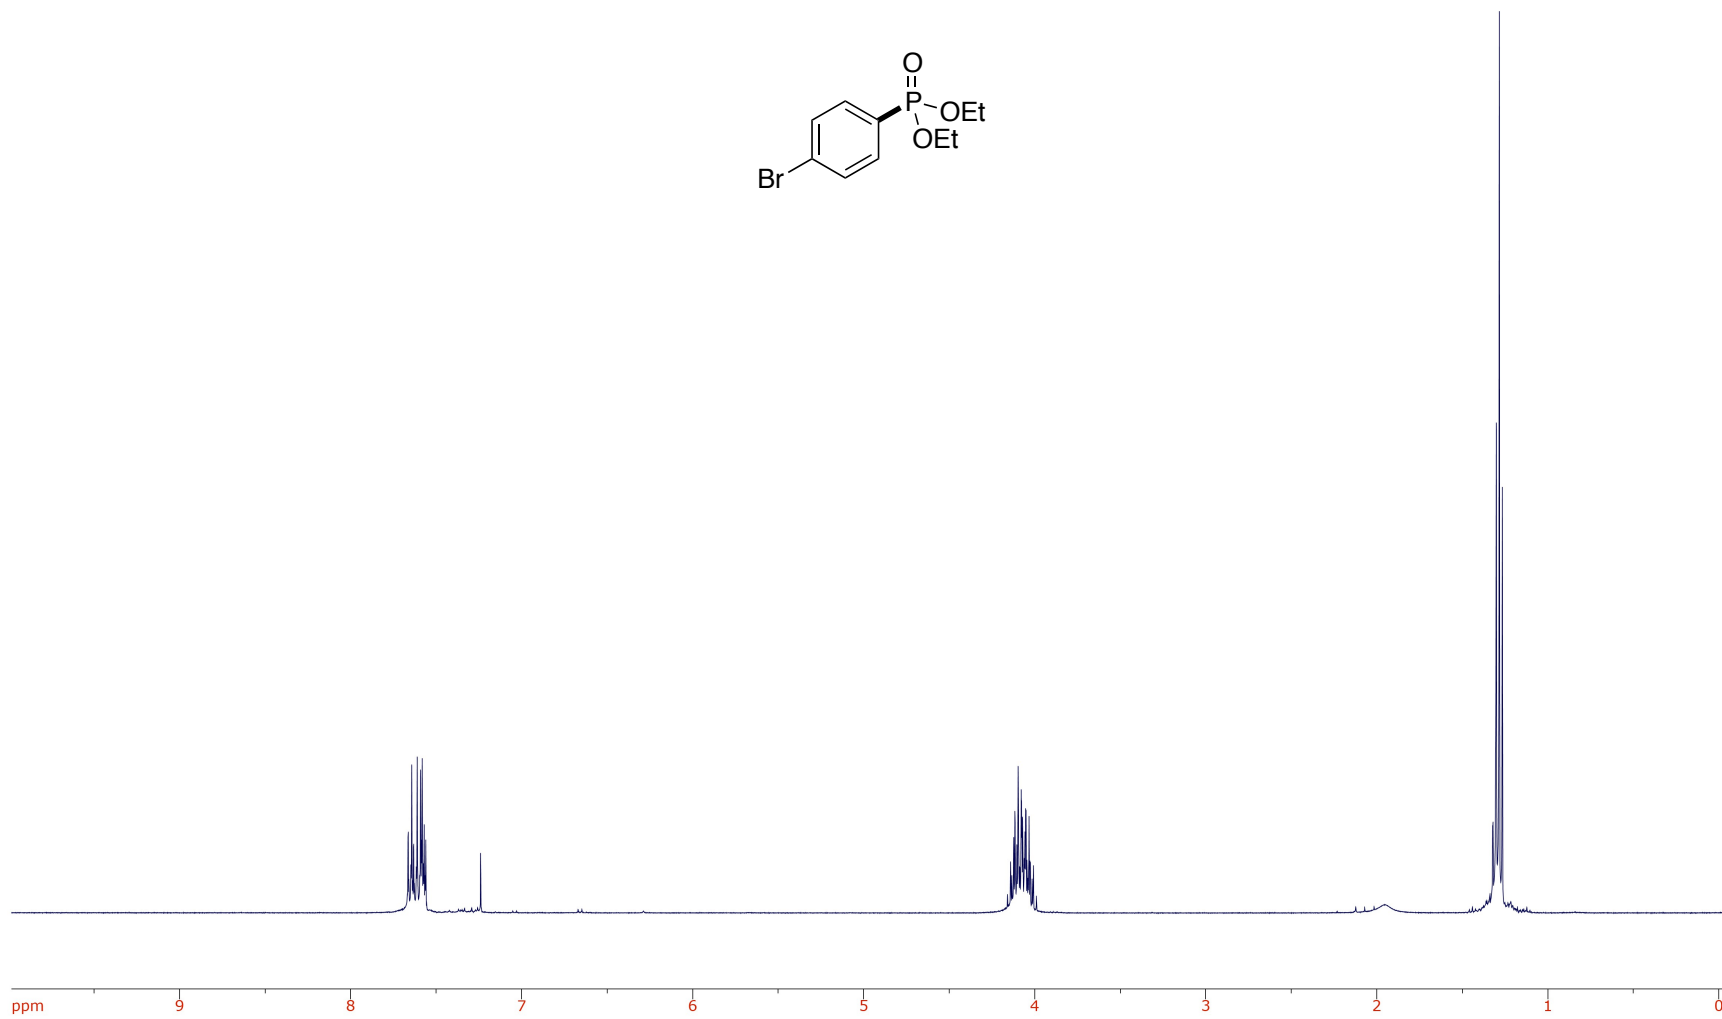

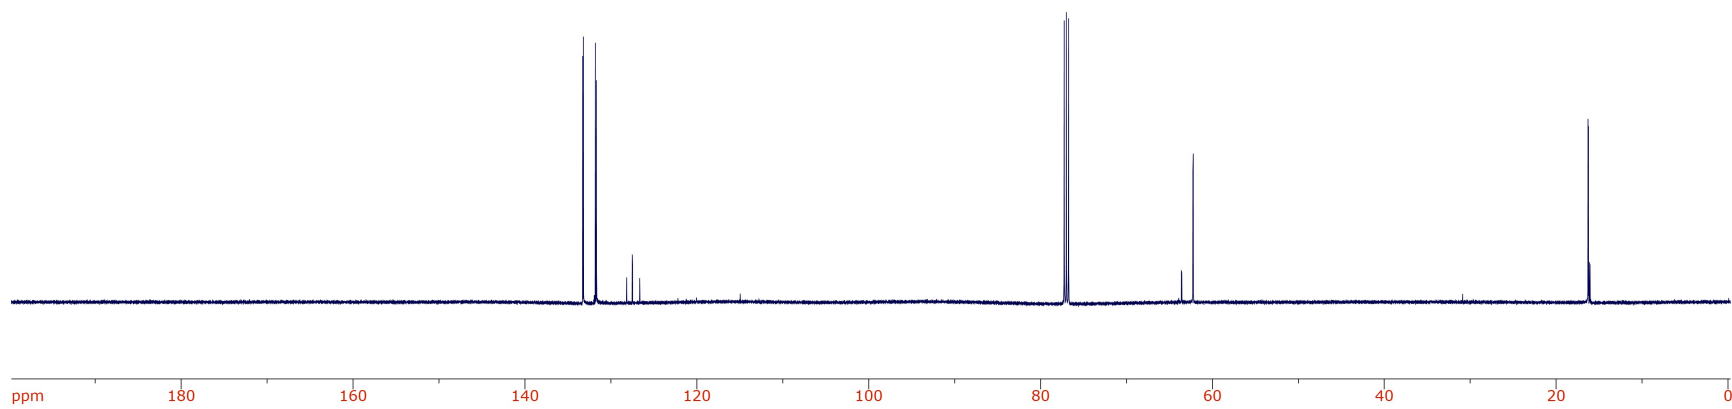



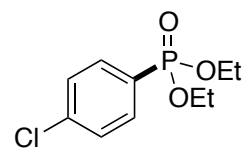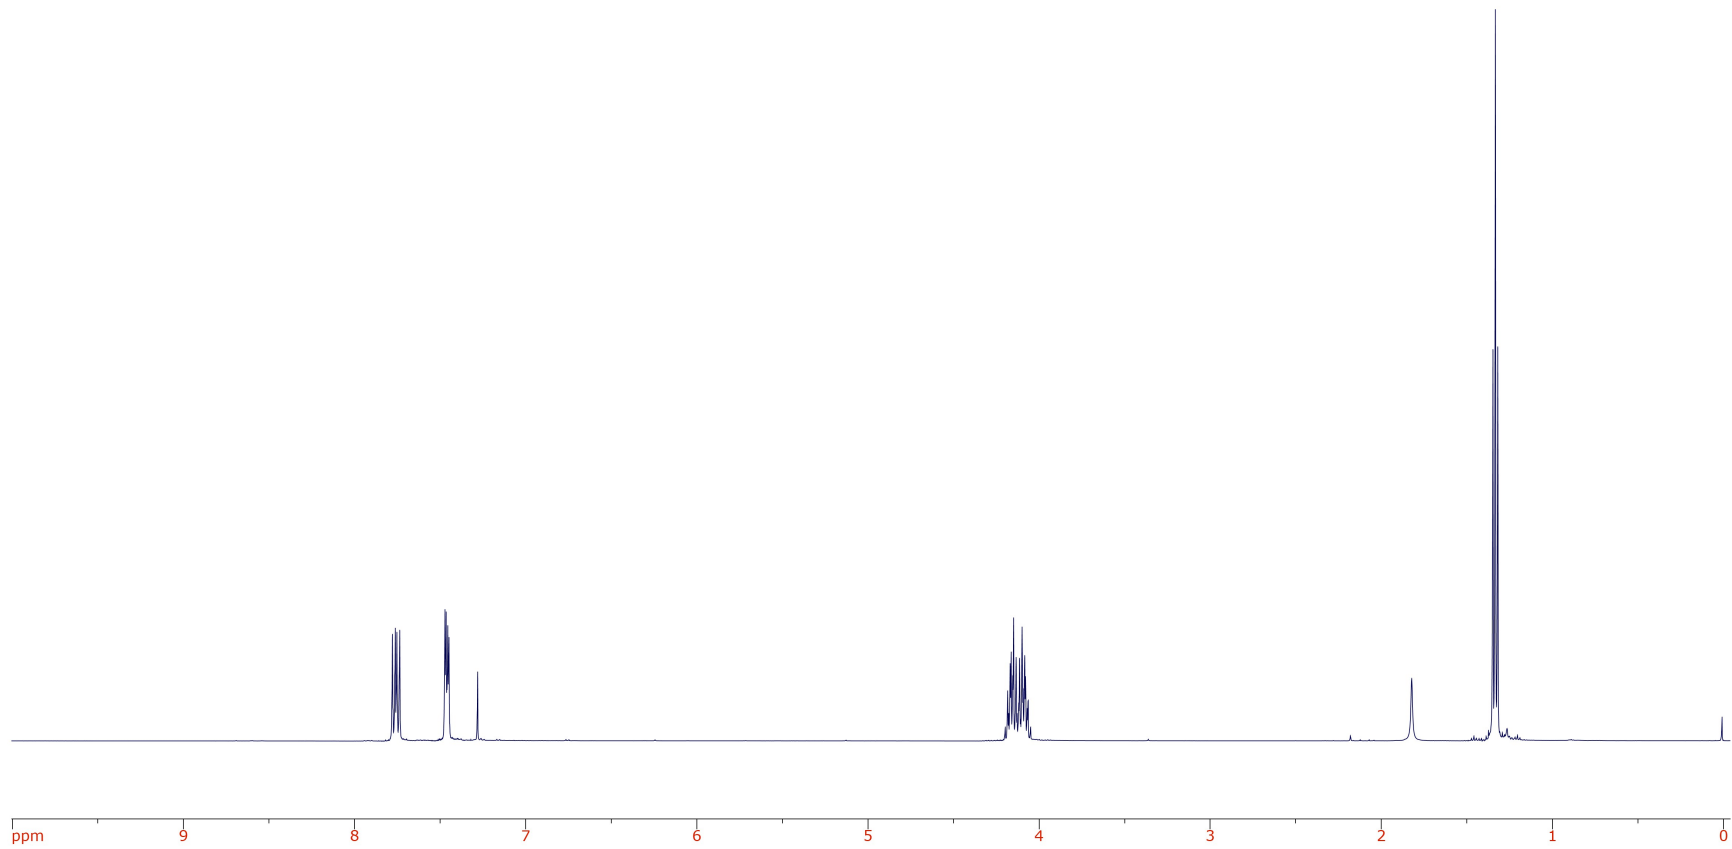

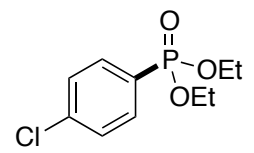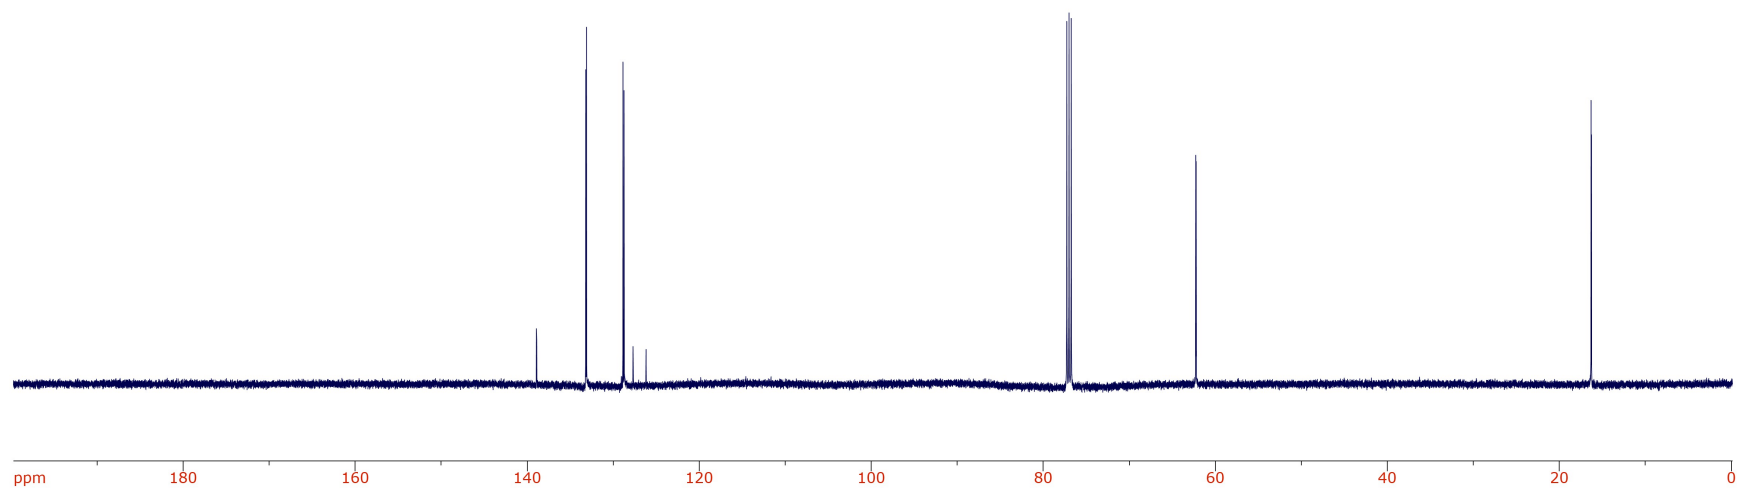

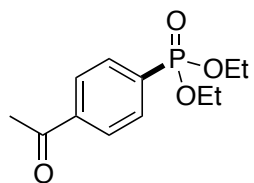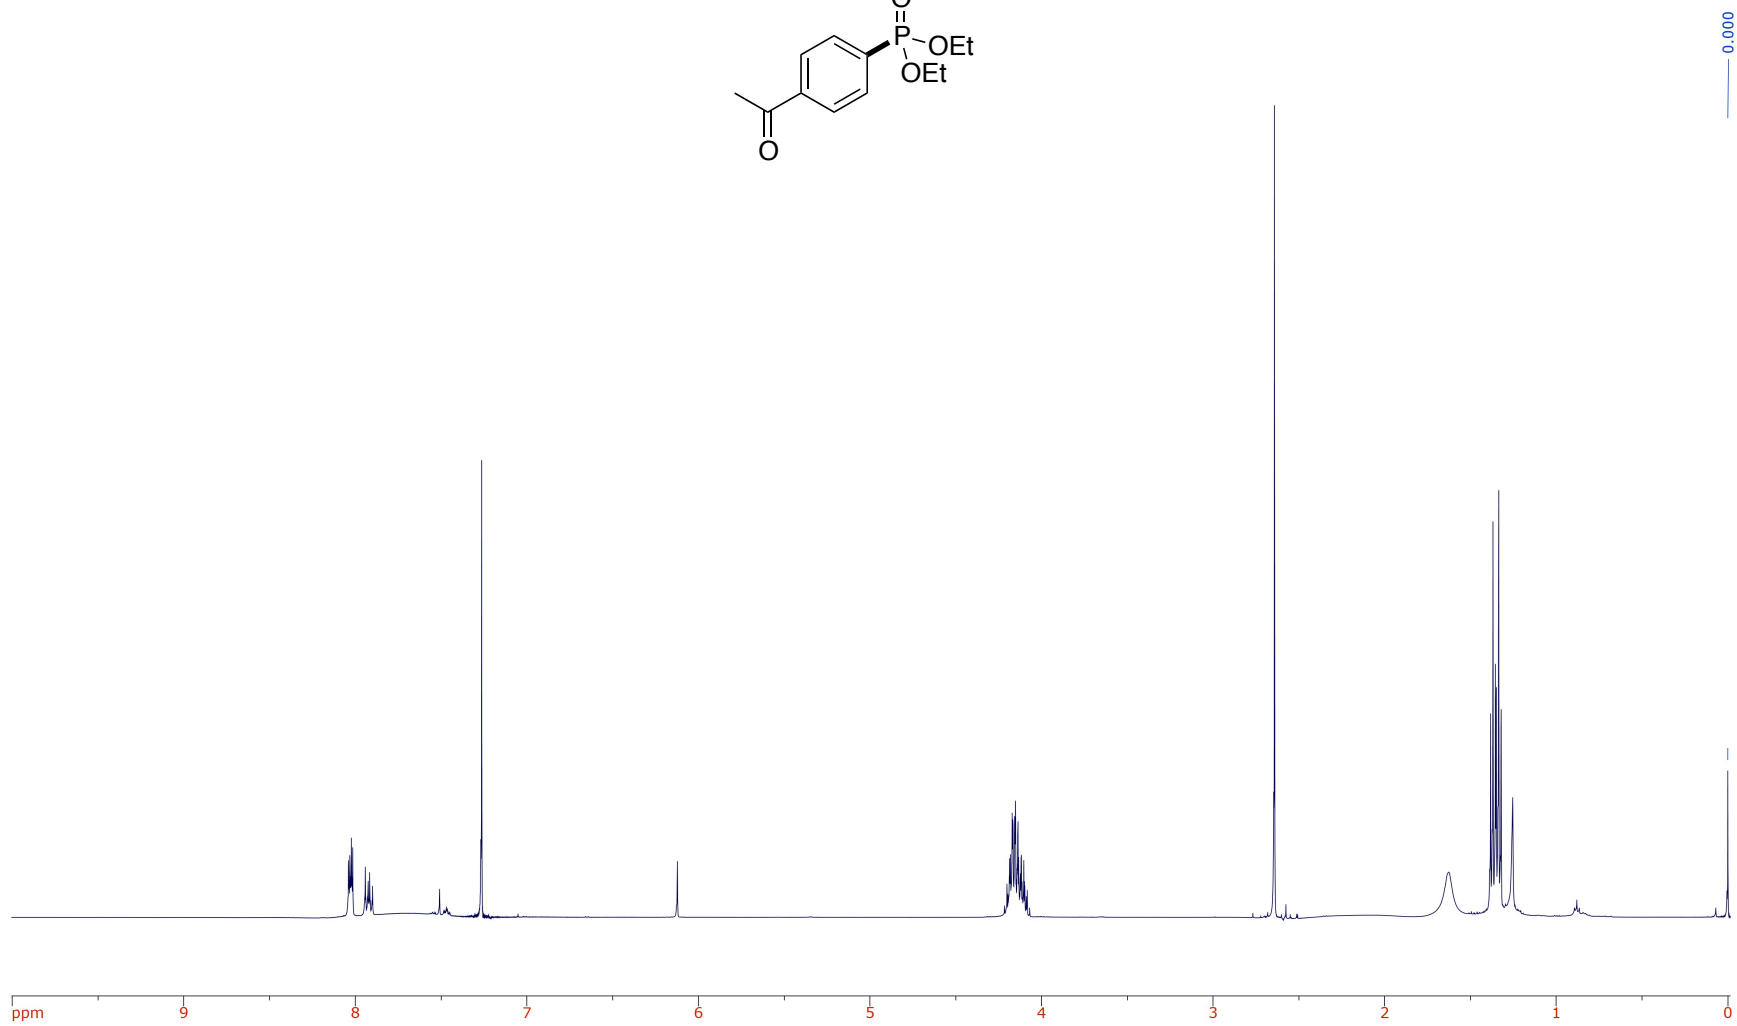

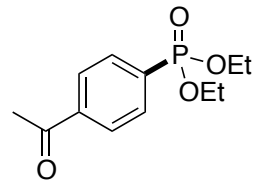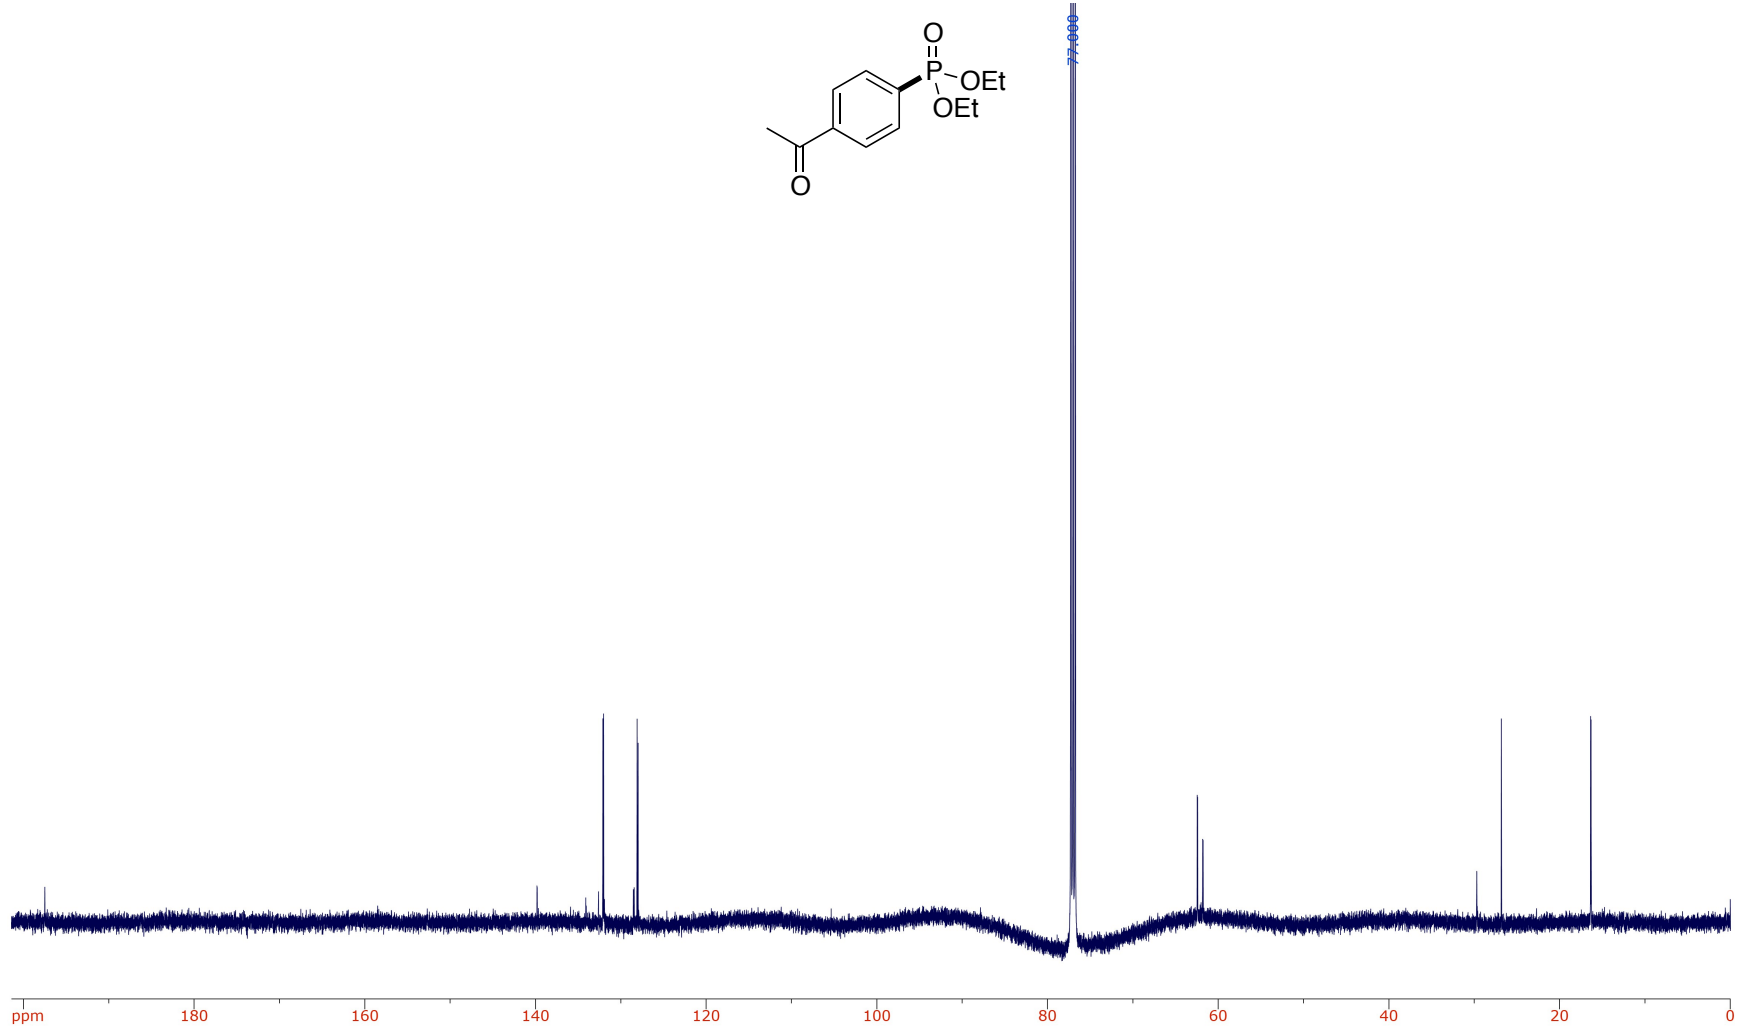

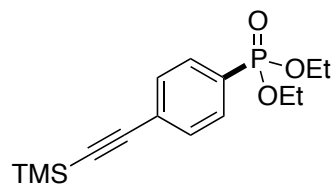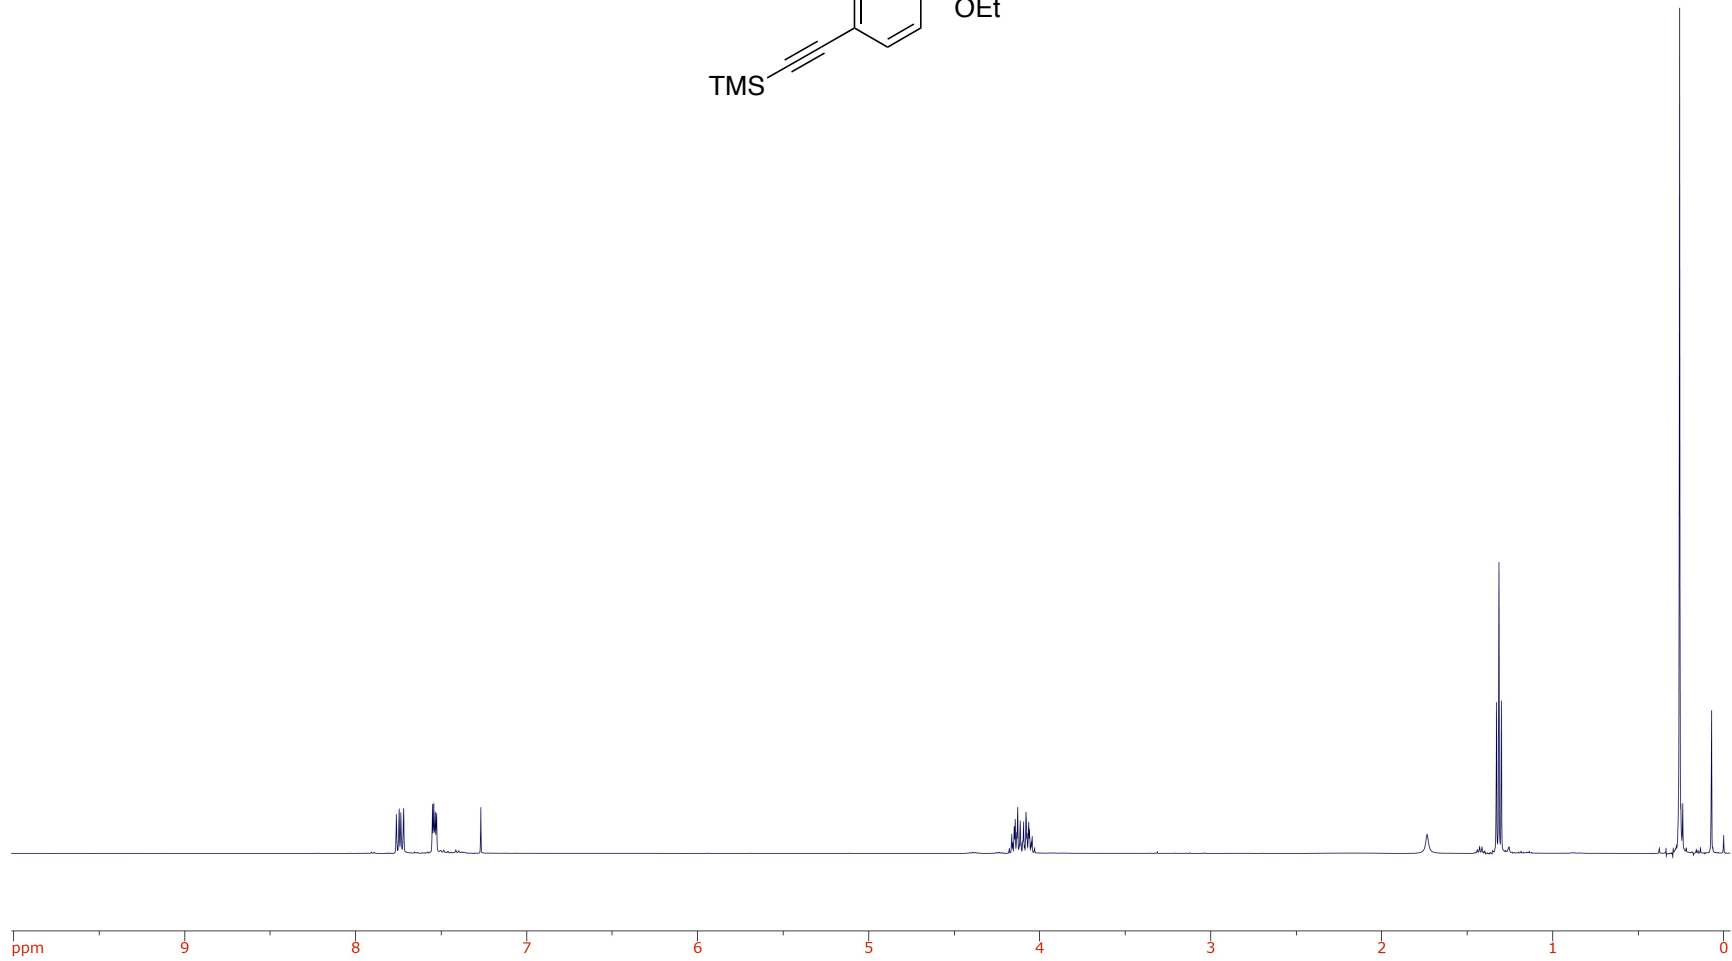

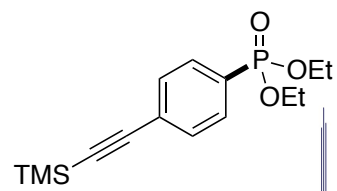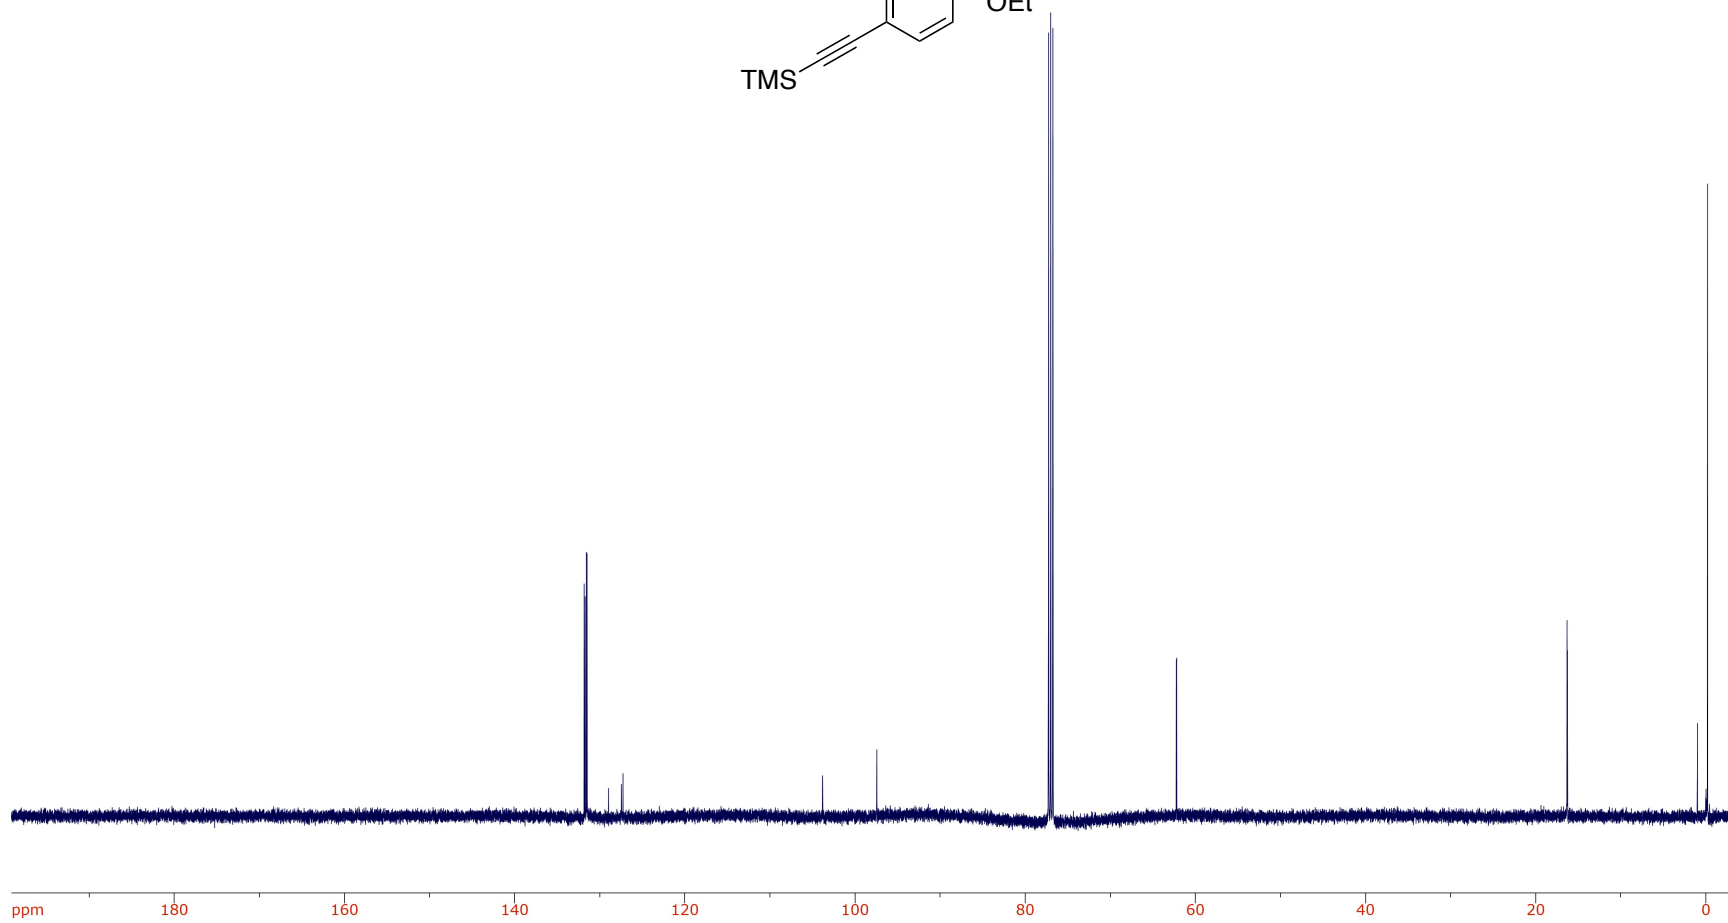

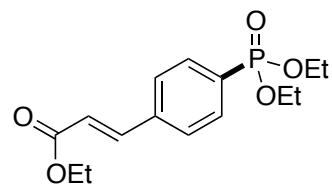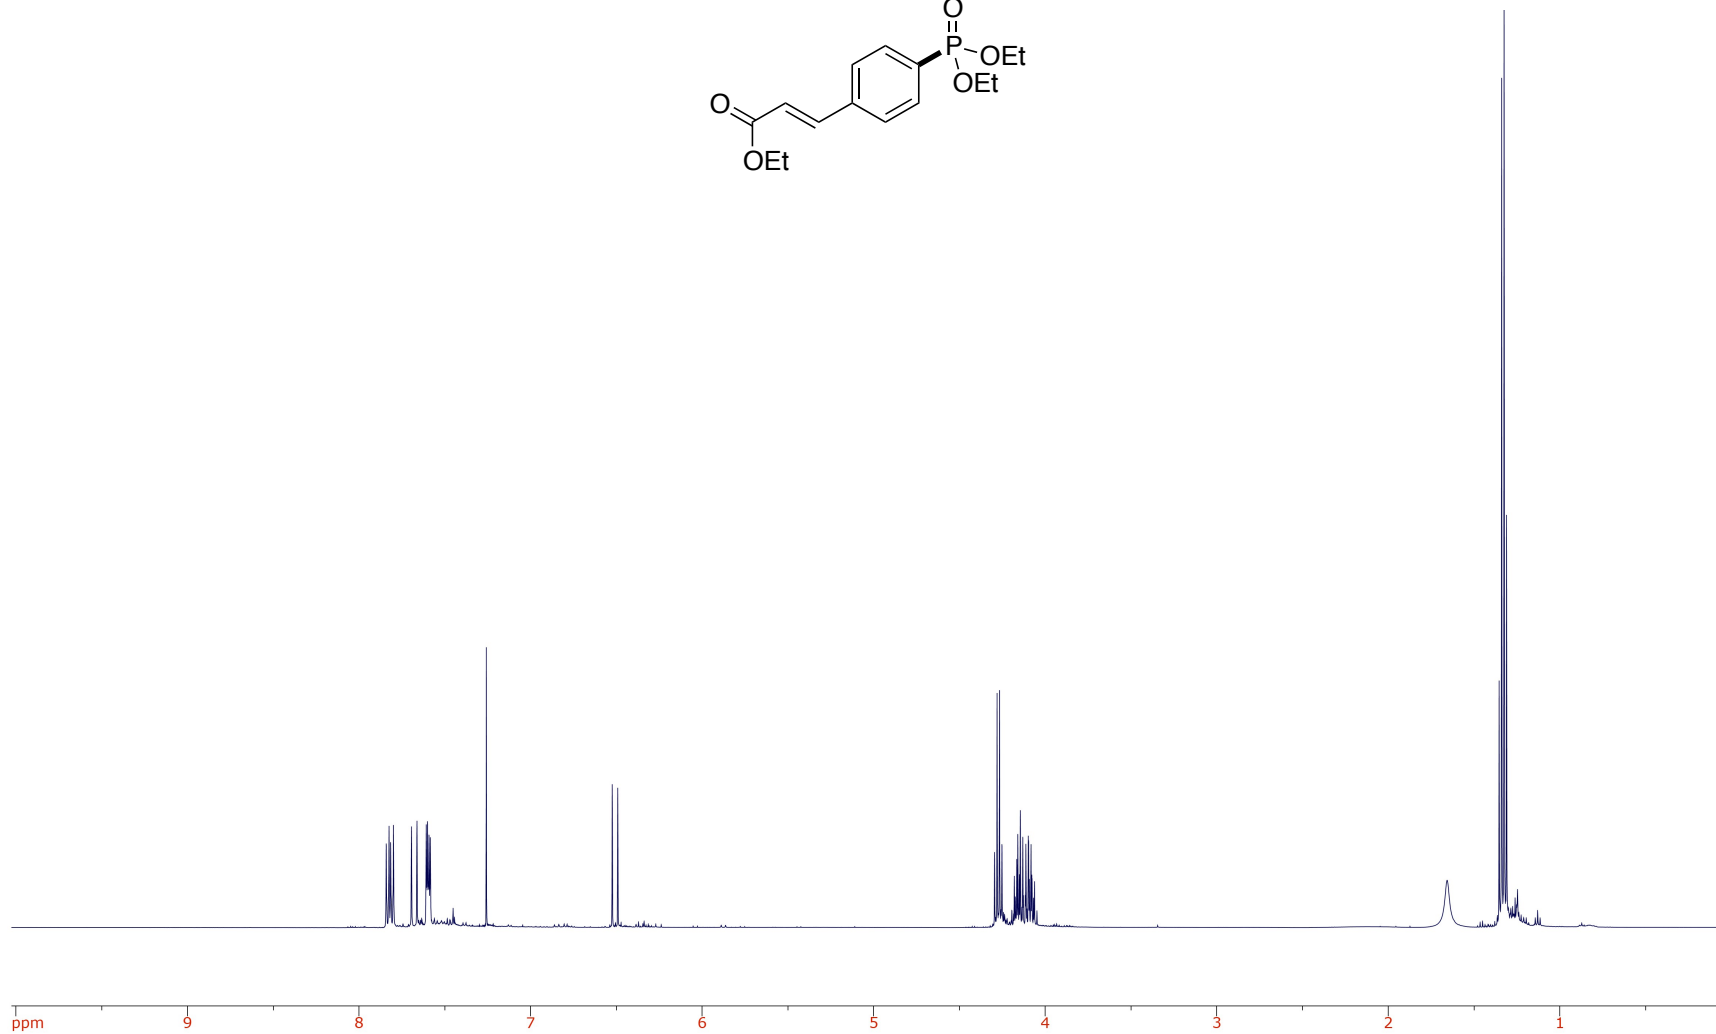

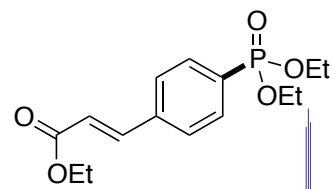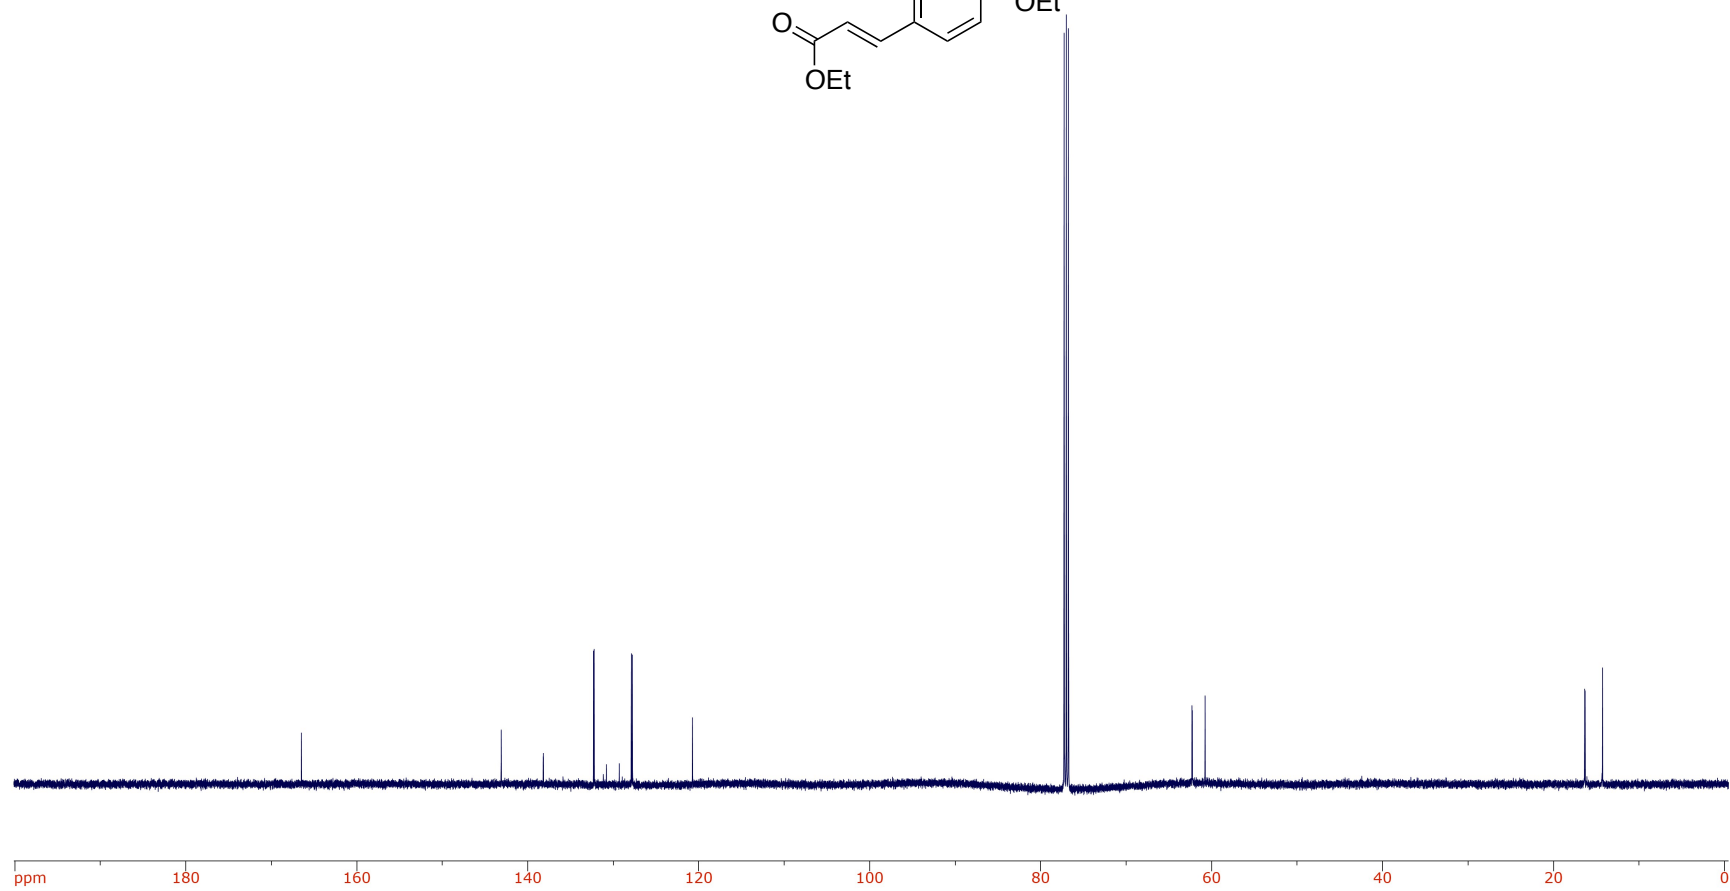



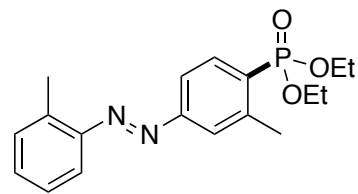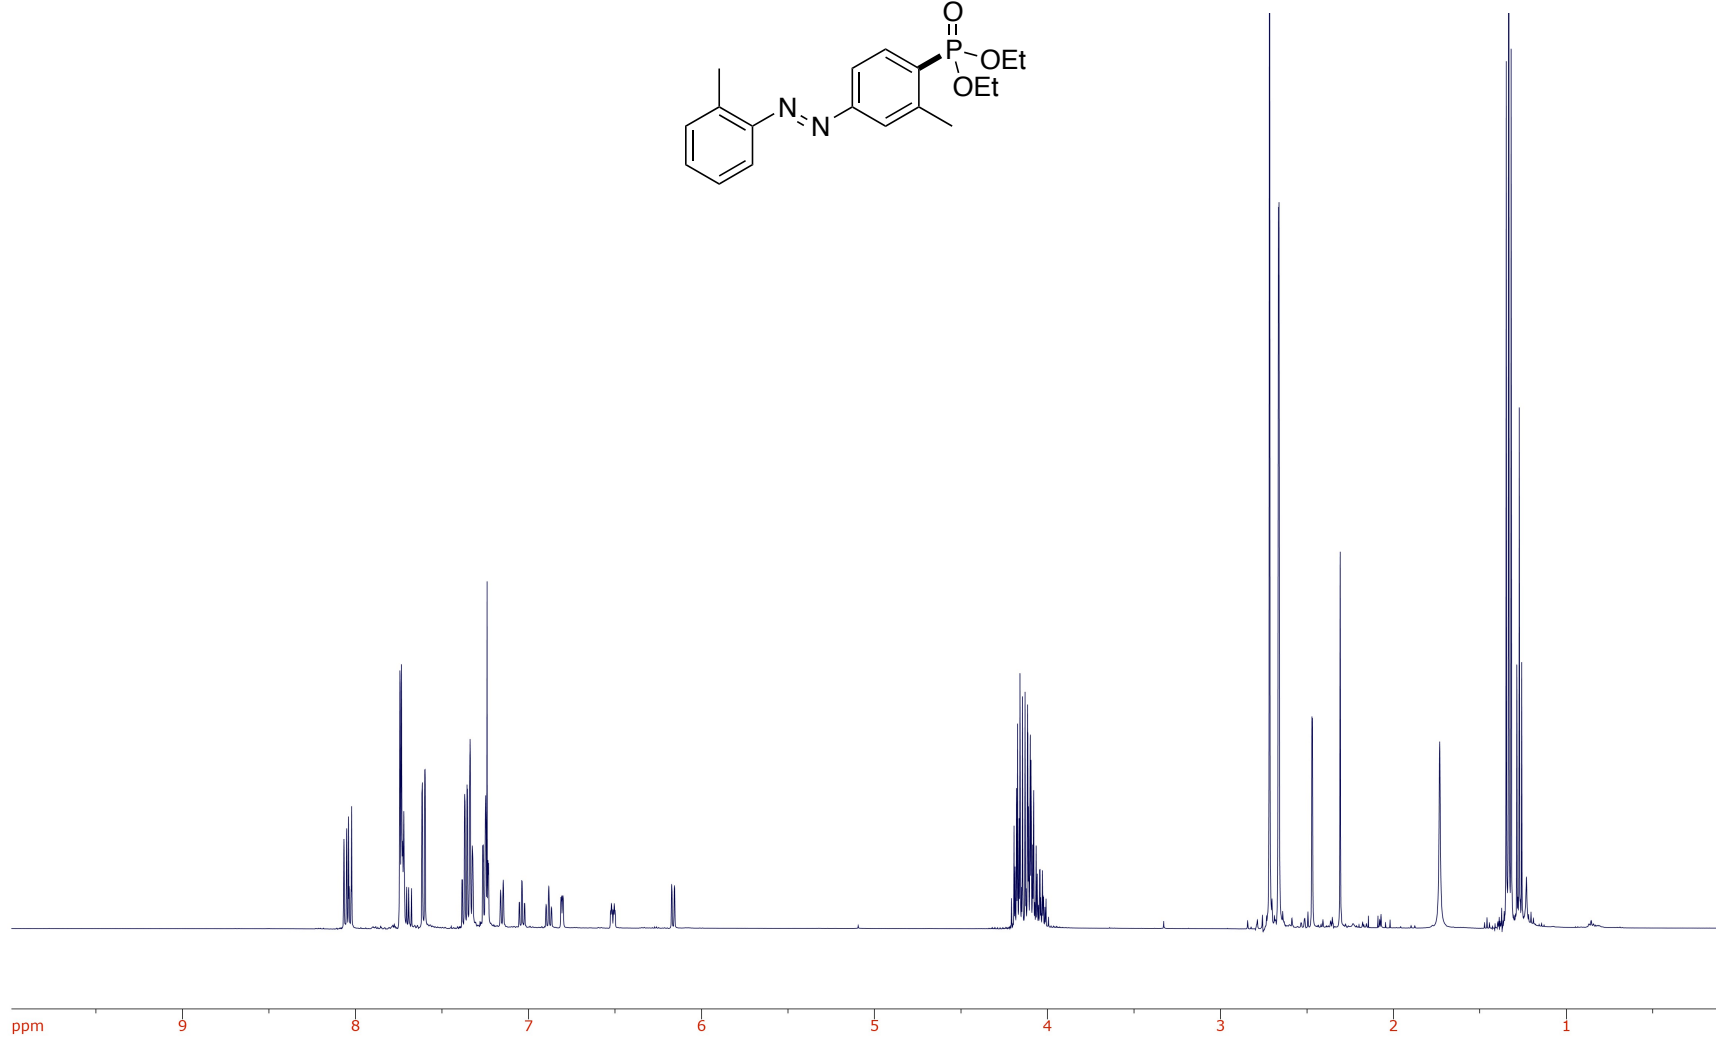

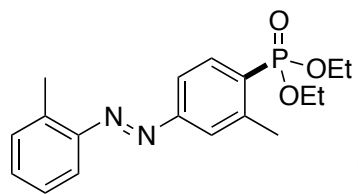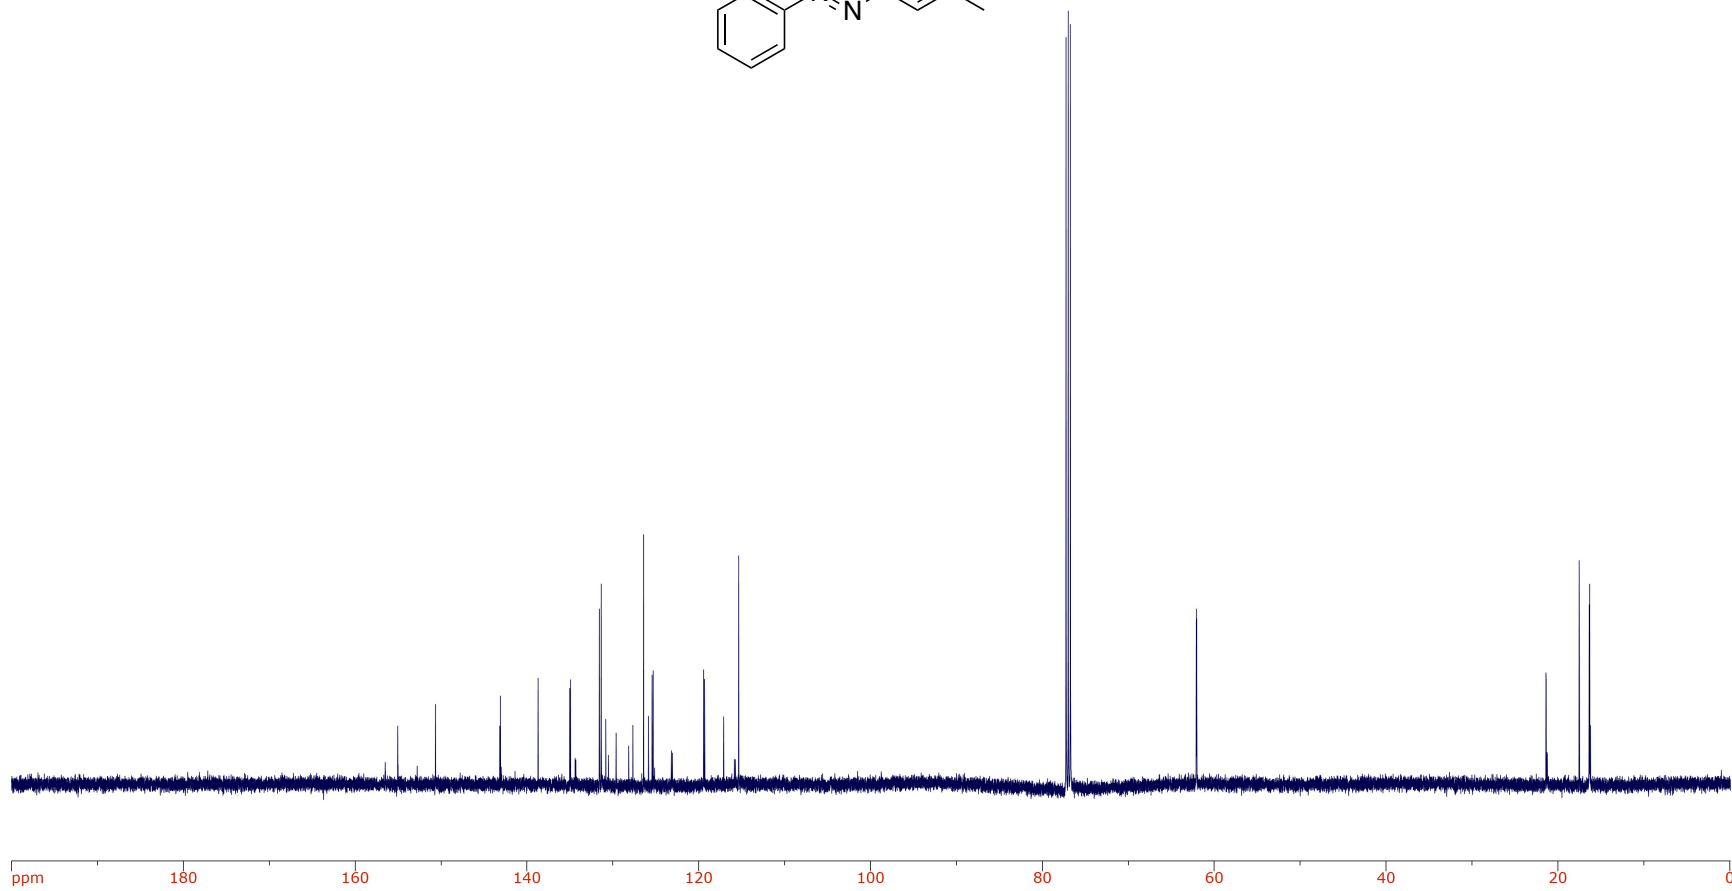

Supplement: SC-007-C6SC01742H-s001.pdf [file SC-007-C6SC01742H-s001.pdf]
